# Supplementary material
Source: PubMed Central journal article supplement (PMC5705240)

# *P*<sup>1</sup>,*P*<sup>2</sup>-Diimidazolyl derivatives of pyrophosphate and *bis*-phosphonates – Synthesis, Properties, and Use in Preparation of Dinucleoside Tetraphosphates and Analogs

Ivan B. Yanachkov, Edward J. Dix, Milka I. Yanachkova, George E. Wright

## Supplementary Materials

|                                                                                                                                                            |    |
|------------------------------------------------------------------------------------------------------------------------------------------------------------|----|
| <sup>1</sup> H NMR of the di-sodium salt of compound <b>7a</b> in D <sub>2</sub> O                                                                         | 2  |
| <sup>31</sup> P NMR (proton decoupled) of the di-sodium salt of compound <b>7a</b> in D <sub>2</sub> O                                                     | 3  |
| <sup>31</sup> P NMR (proton coupled) of the di-sodium salt of compound <b>7a</b> in D <sub>2</sub> O                                                       | 4  |
| <sup>13</sup> C NMR of the di-sodium salt of compound <b>7a</b> in D <sub>2</sub> O                                                                        | 5  |
| ESI Negative mode MS and selective MS <sup>2</sup> and MS <sup>3</sup> fragmentation of compound <b>7a</b>                                                 | 6  |
| ESI Positive mode MS and selective MS <sup>2</sup> fragmentation of compound <b>7a</b>                                                                     | 7  |
| <sup>1</sup> H NMR of the di-sodium salt of compound <b>7b</b> in DMSO-d <sub>6</sub> /D <sub>2</sub> O                                                    | 8  |
| <sup>31</sup> P NMR (proton decoupled) of the di-sodium salt of compound <b>7b</b> in DMSO-d <sub>6</sub> /D <sub>2</sub> O                                | 9  |
| <sup>31</sup> P NMR (proton coupled) of the di-sodium salt of compound <b>7b</b> in DMSO-d <sub>6</sub> /D <sub>2</sub> O                                  | 10 |
| LCMS of the di-sodium salt of compound <b>7b</b>                                                                                                           | 11 |
| LCMS of the di-sodium salt of compound <b>7c</b>                                                                                                           | 12 |
| <sup>1</sup> H NMR of the di-sodium salt of compound <b>7d</b> in DMSO-d <sub>6</sub>                                                                      | 13 |
| <sup>31</sup> P NMR (proton decoupled) of the di-sodium salt of compound <b>7d</b> in DMSO-d <sub>6</sub>                                                  | 14 |
| LCMS of the di-sodium salt of compound <b>7d</b>                                                                                                           | 15 |
| <sup>1</sup> H NMR spectrum of Ap <sub>4</sub> A sodium salt, <b>3a</b> in D <sub>2</sub> O                                                                | 16 |
| <sup>31</sup> P (proton decoupled) NMR spectrum of Ap <sub>4</sub> A sodium salt, <b>3a</b> in D <sub>2</sub> O                                            | 17 |
| <sup>31</sup> P (proton coupled) NMR spectrum of Ap <sub>4</sub> A sodium salt, <b>3a</b> in D <sub>2</sub> O                                              | 18 |
| LCMS of Ap <sub>4</sub> A, <b>3a</b>                                                                                                                       | 19 |
| <sup>1</sup> H NMR spectrum of Up <sub>4</sub> U sodium salt, <b>3f</b> in D <sub>2</sub> O                                                                | 20 |
| <sup>31</sup> P (proton decoupled) NMR spectrum of Up <sub>4</sub> U sodium salt, <b>3f</b> in D <sub>2</sub> O                                            | 21 |
| <sup>31</sup> P (proton coupled) NMR spectrum of Up <sub>4</sub> U sodium salt, <b>3f</b> in D <sub>2</sub> O                                              | 22 |
| LCMS of Up <sub>4</sub> U, <b>3f</b>                                                                                                                       | 23 |
| Simulated fitting of an AA'XX' spin system to the <sup>31</sup> P NMR spectra of Ap <sub>4</sub> A and Up <sub>4</sub> U ( <b>3a</b> and <b>3f</b> , resp) | 24 |
| <sup>1</sup> H NMR of APPCHCIPPA sodium salt, <b>3c</b> in D <sub>2</sub> O                                                                                | 25 |
| <sup>31</sup> P NMR (proton decoupled) of APPCHCIPPA sodium salt, <b>3c</b> in D <sub>2</sub> O                                                            | 26 |
| <sup>31</sup> P NMR (proton coupled) of APPCHCIPPA sodium salt, <b>3c</b> in D <sub>2</sub> O                                                              | 27 |
| LCMS analysis of APPCHCIPPA sodium salt, <b>3c</b>                                                                                                         | 28 |
| <sup>1</sup> H NMR of APPCHFPPA, <b>3e</b> as the tetrabutylammonium salt in D <sub>2</sub> O                                                              | 29 |
| <sup>31</sup> P NMR (proton decoupled) of APPCHFPPA, <b>3e</b> as the tetrabutylammonium salt in D <sub>2</sub> O                                          | 30 |
| <sup>31</sup> P NMR (proton coupled) of APPCHFPPA, <b>3e</b> as the tetrabutylammonium salt in D <sub>2</sub> O                                            | 31 |
| LCMS of APPCHFPPA sodium salt, <b>3e</b>                                                                                                                   | 32 |
| <sup>1</sup> H NMR of AP(S)PPP(S)A sodium salt, <b>3b</b> in D <sub>2</sub> O                                                                              | 33 |
| <sup>31</sup> P (proton decoupled) NMR of AP(S)PPP(S)A sodium salt, <b>3b</b> in D <sub>2</sub> O                                                          | 34 |
| Separation of the three diastereomers of AP(S)PPP(S)A, <b>3b</b> by reverse phase ion-pairing chromatography                                               | 35 |
| <sup>1</sup> H NMR spectrum of AP(S)PCHCIPP(S)A sodium salt, <b>3d</b> in D <sub>2</sub> O                                                                 | 36 |
| <sup>31</sup> P (proton decoupled) NMR spectrum of AP(S)PCHCIPP(S)A sodium salt, <b>3d</b> in D <sub>2</sub> O                                             | 37 |
| <sup>31</sup> P (proton coupled) NMR spectrum of AP(S)PCHCIPP(S)A sodium salt, <b>3d</b> in D <sub>2</sub> O                                               | 38 |
| Separation of the four diastereomers of AP(S)PPCHCIP(S)A, <b>3d</b> by reverse phase ion-pairing chromatography                                            | 39 |

<sup>1</sup>H NMR of the di-sodium salt of compound 7a in D<sub>2</sub>O

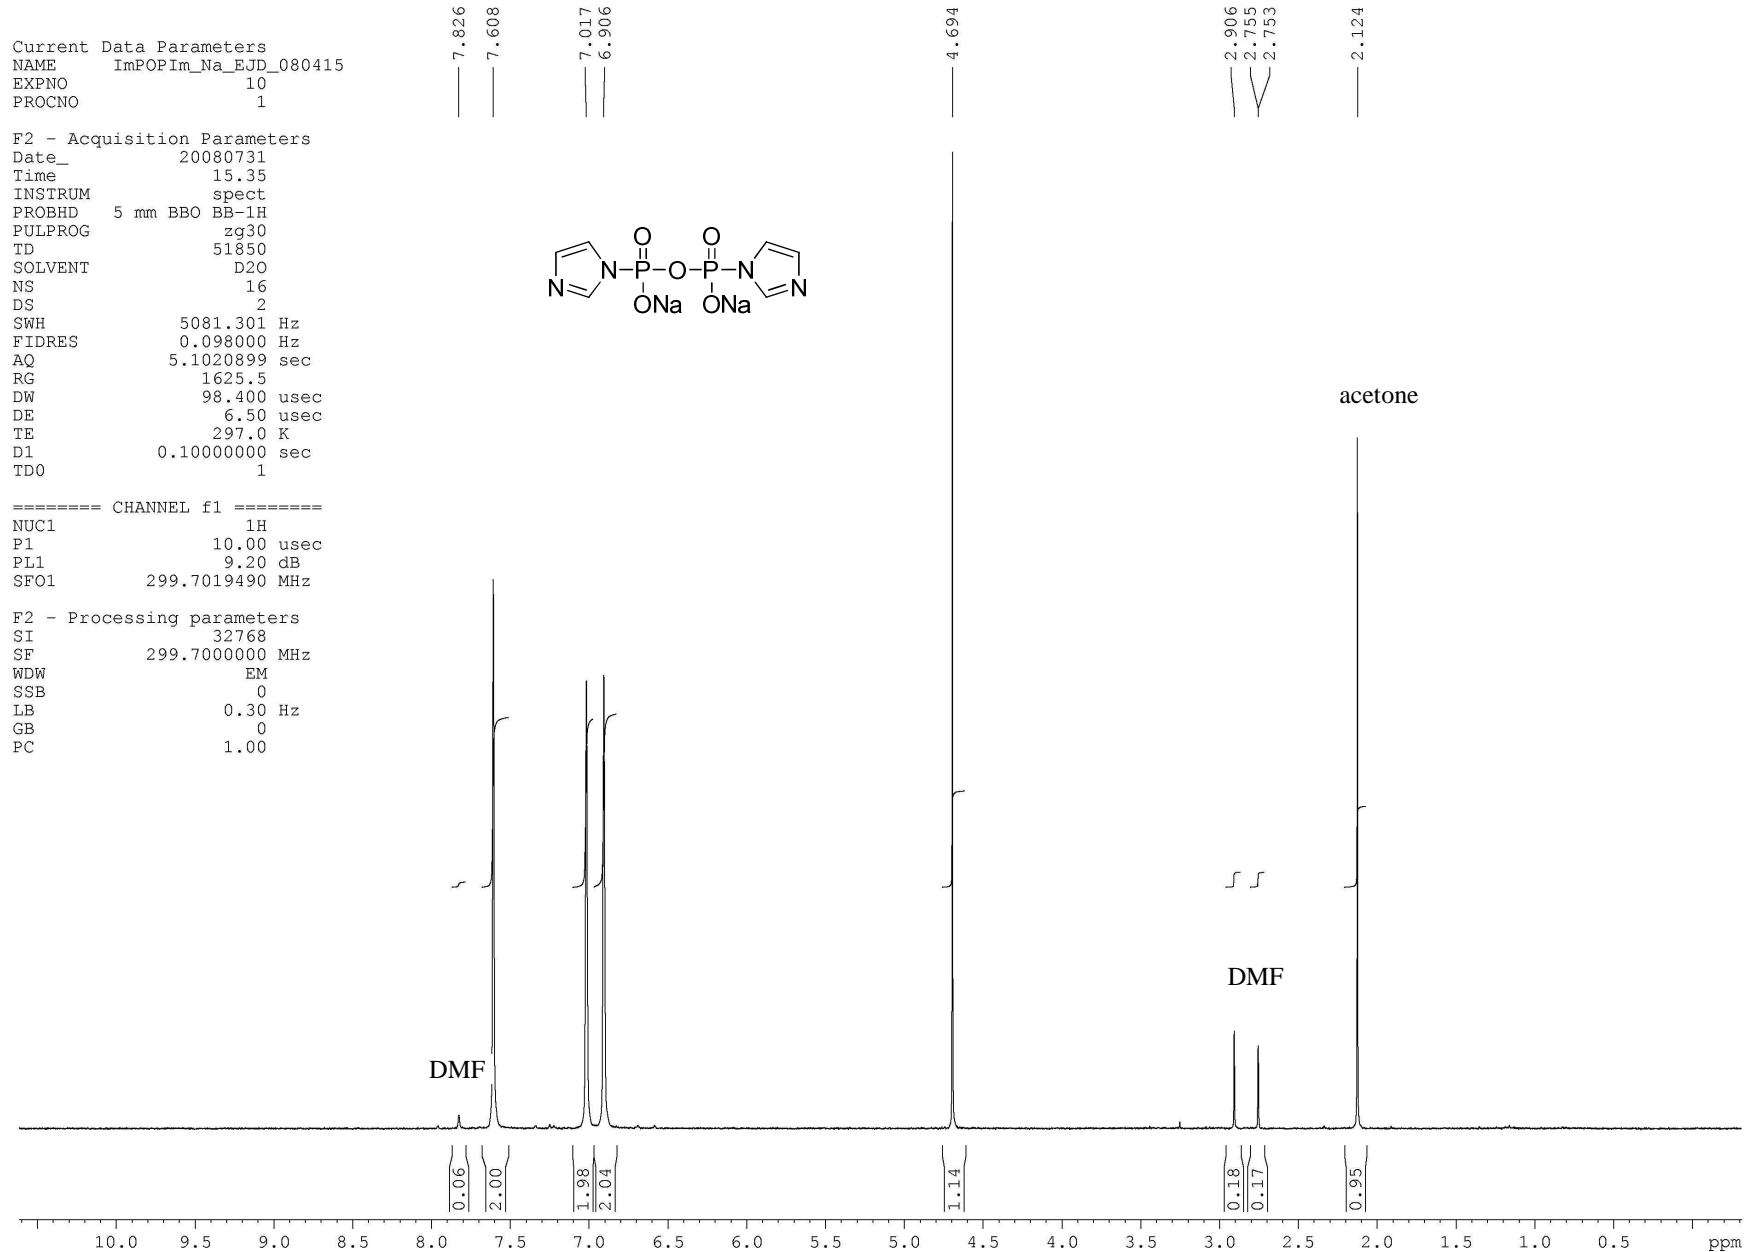

<sup>31</sup>P NMR (proton decoupled) of the di-sodium salt of compound **7a** in D<sub>2</sub>O

Current Data Parameters  
NAME ImPOPm\_Na\_EJD\_080415  
EXPNO 20  
PROCNO 1

F2 - Acquisition Parameters

Date\_ 20080731  
Time 15.38  
INSTRUM spect  
PROBHD 5 mm BBO BB-1H  
PULPROG zgpg30  
TD 136248  
SOLVENT D2O  
NS 152  
DS 4  
SWH 48661.801 Hz  
FIDRES 0.357156 Hz  
AQ 1.3999982 sec  
RG 14596.5  
DW 10.275 usec  
DE 6.50 usec  
TE 297.0 K  
D1 0.10000000 sec  
d11 0.03000000 sec  
DELTA 0.00000000 sec  
TD0 1

===== CHANNEL f1 =====

NUC1 31P  
P1 7.00 usec  
PL1 12.70 dB  
SFO1 121.3207840 MHz

===== CHANNEL f2 =====

CPDPRG2 waltz16  
NUC2 1H  
PCPD2 100.00 usec  
PL12 29.00 dB  
PL13 120.00 dB  
PL2 9.00 dB  
SFO2 299.7011988 MHz

F2 - Processing parameters

SI 32768  
SF 121.3207388 MHz  
WDW EM  
SSB 0  
LB 1.00 Hz  
GB 0  
PC 1.40

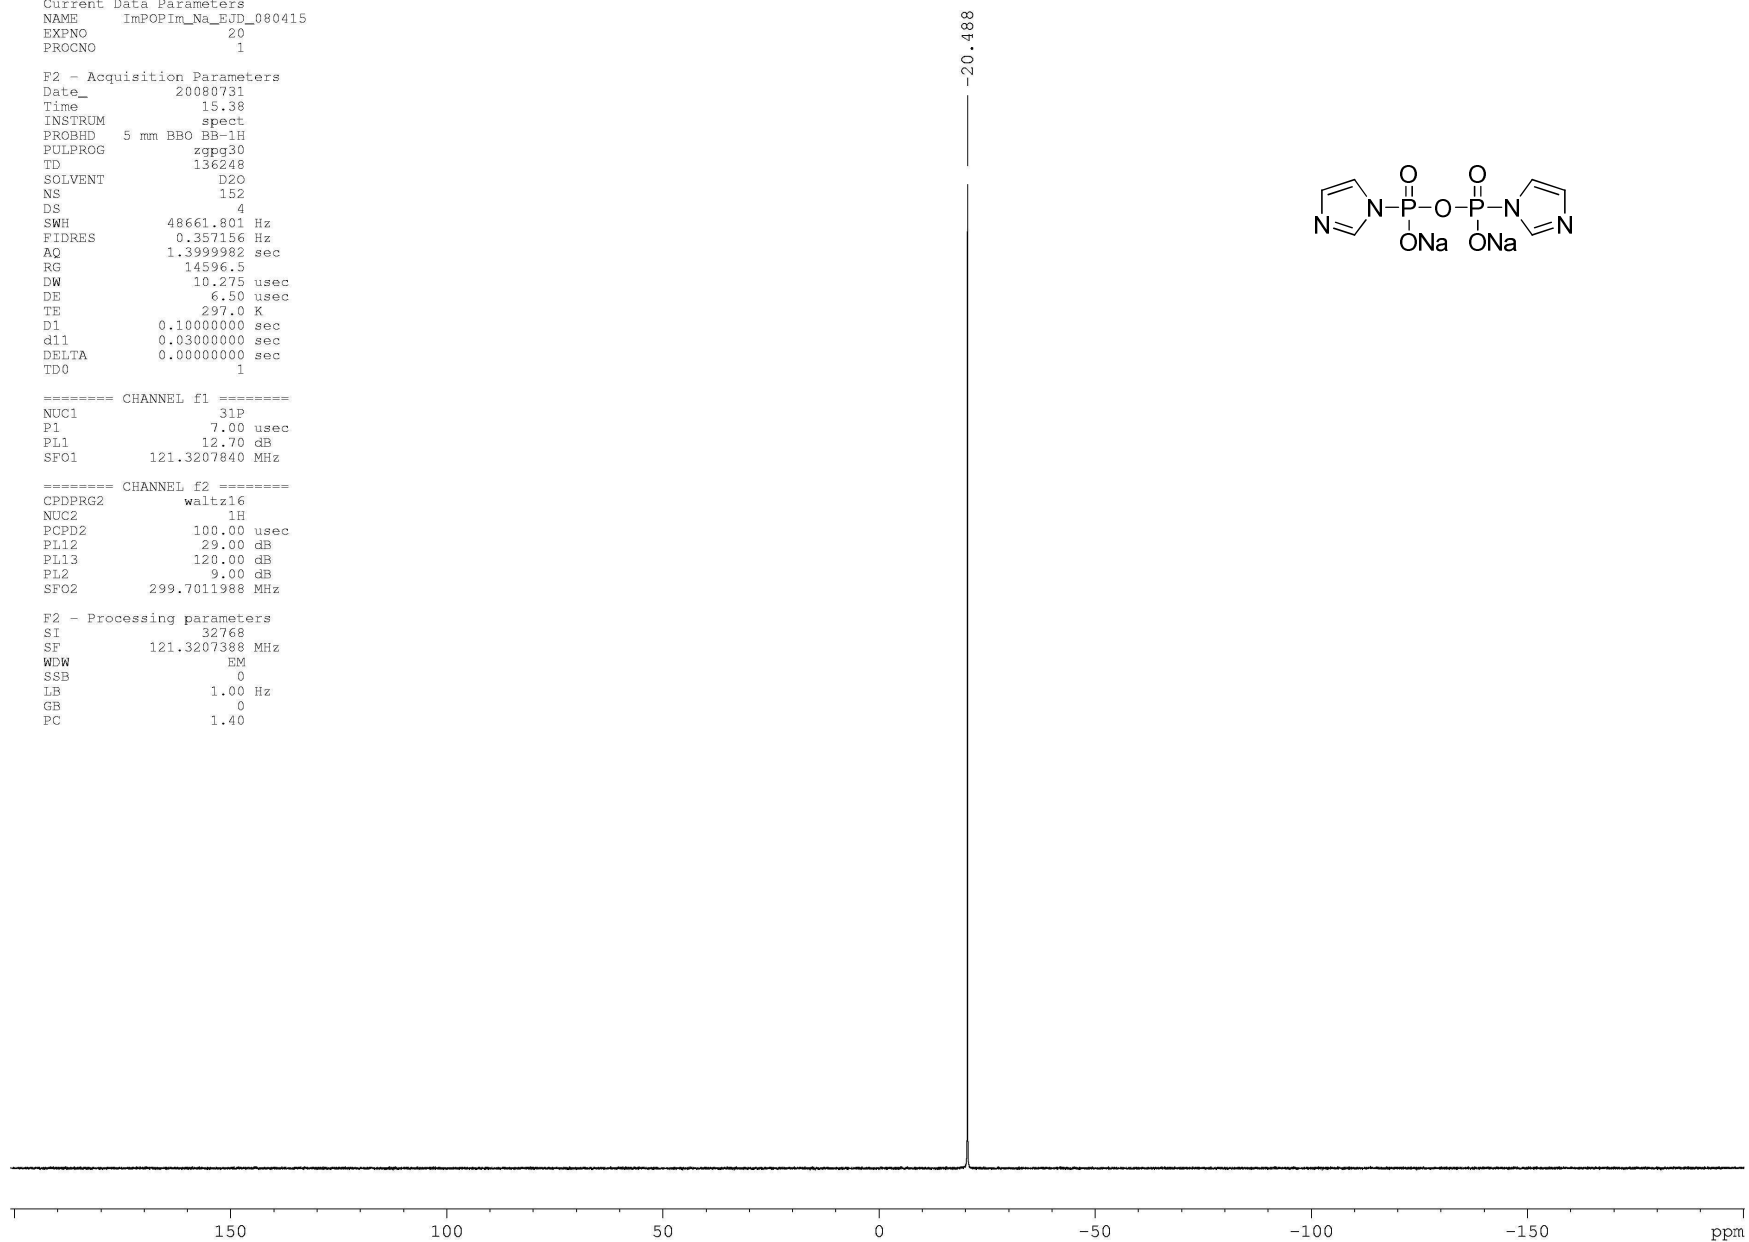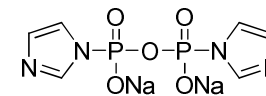

<sup>31</sup>P NMR (proton coupled) of the di-sodium salt of compound **7a** in D<sub>2</sub>O

Current Data Parameters  
NAME ImPOPIm\_Na\_EJD\_080415  
EXPNO 30  
PROCNO 1

F2 - Acquisition Parameters  
Date\_ 20080731  
Time 15.43  
INSTRUM spect  
PROBHD 5 mm BBO BB-1H  
PULPROG zg30  
TD 175176  
SOLVENT D2O  
NS 32  
DS 4  
SWH 48661.801 Hz  
FIDRES 0.277788 Hz  
AQ 1.7999834 sec  
RG 2580.3  
DW 10.275 usec  
DE 6.50 usec  
TE 297.1 K  
D1 0.10000000 sec  
TD0 1

===== CHANNEL f1 =====  
NUC1 31P  
P1 7.00 usec  
PL1 12.70 dB  
SFO1 121.3147177 MHz

F2 - Processing parameters  
SI 32768  
SF 121.3207840 MHz  
WDW EM  
SSB 0  
LB 1.00 Hz  
GB 0  
PC 1.40

-20.860

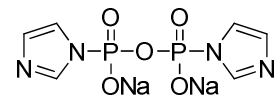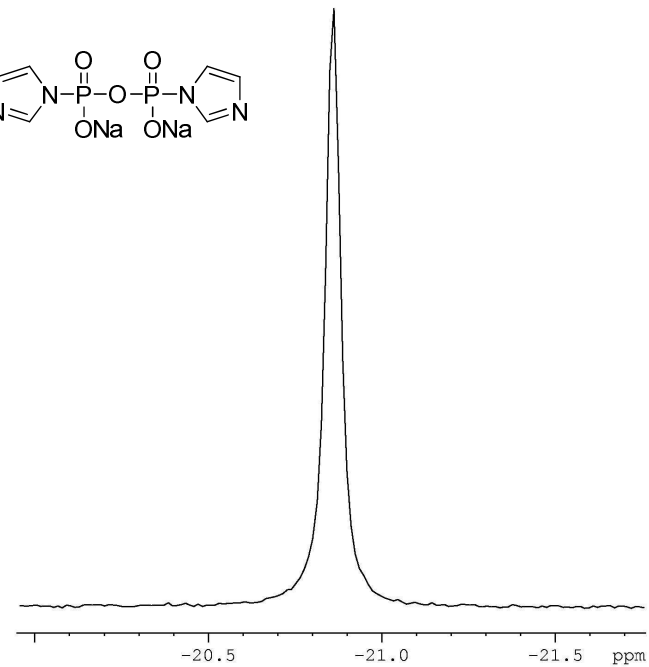

100 50 0 -50 -100 -150 -200 ppm

<sup>13</sup>C NMR of the di-sodium salt of compound **7a** in D<sub>2</sub>O

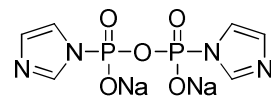

Current Data Parameters  
NAME ImPOPIm\_Na\_EJD\_080415  
EXPNO 41  
PROCNO 1

F2 - Acquisition Parameters  
Date\_ 20080731  
Time 23.01  
INSTRUM spect  
PROBHD 5 mm BBO BB-1H  
PULPROG zgpg30  
TD 65536  
SOLVENT D2O  
NS 10240  
DS 4  
SWH 17985.611 Hz  
FIDRES 0.274439 Hz  
AQ 1.8219508 sec  
RG 2580.3  
DW 27.800 usec  
DE 6.50 usec  
TE 295.0 K  
D1 0.10000000 sec  
d11 0.03000000 sec  
DELTA 0.00000000 sec  
TDO 1

===== CHANNEL f1 =====  
NUC1 13C  
P1 8.00 usec  
PL1 6.30 dB  
SFO1 75.3671609 MHz

===== CHANNEL f2 =====  
CPDPRG2 waltz16  
NUC2 1H  
PCPD2 100.00 usec  
PL12 29.00 dB  
PL13 120.00 dB  
PL2 9.00 dB  
SFO2 299.7011988 MHz

F2 - Processing parameters  
SI 32768  
SF 75.3596627 MHz  
WDW EM  
SSB 0  
LB 0.50 Hz  
GB 0  
PC 1.40

139.18  
128.21  
119.41

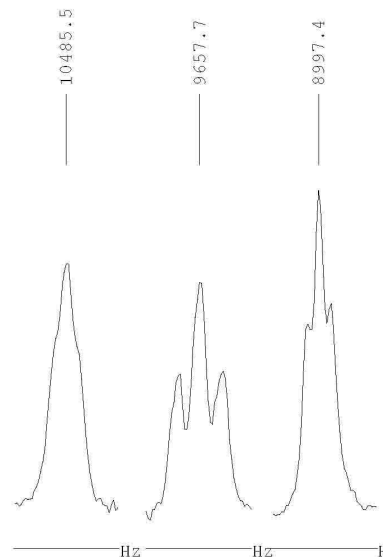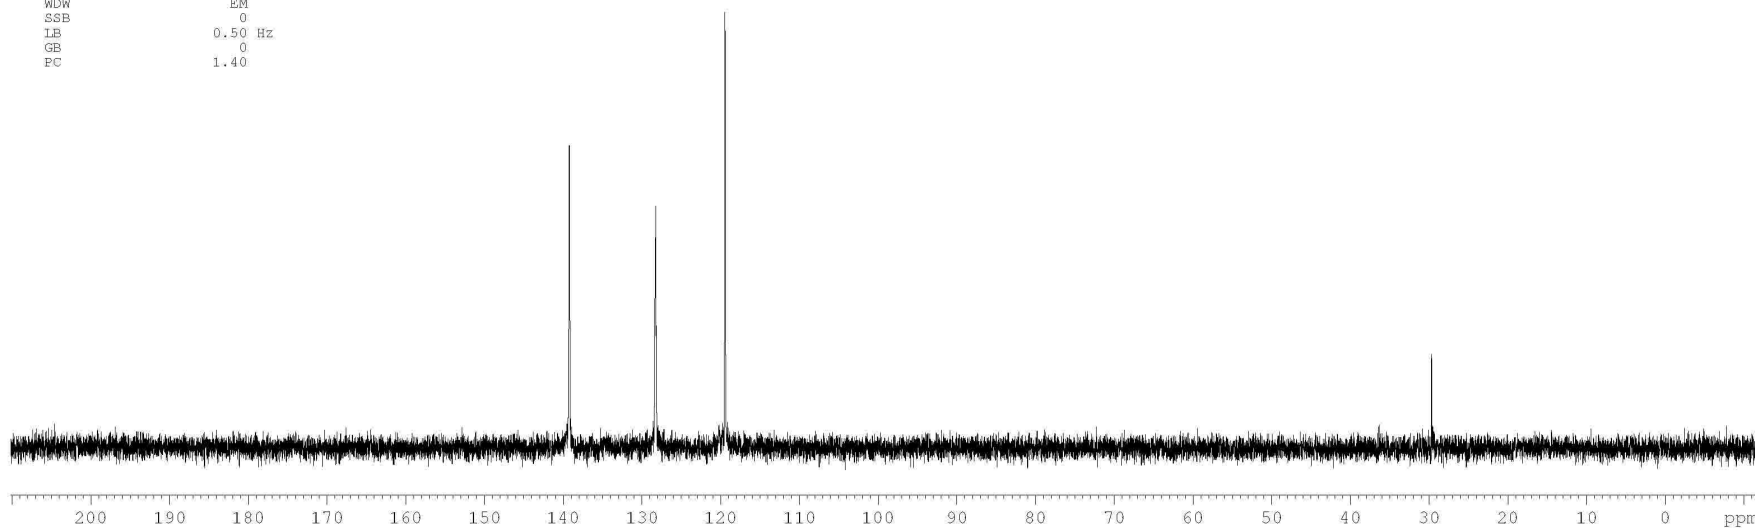

ESI Negative mode MS and selective MS<sup>2</sup> and MS<sup>3</sup> fragmentation of compound **7a**

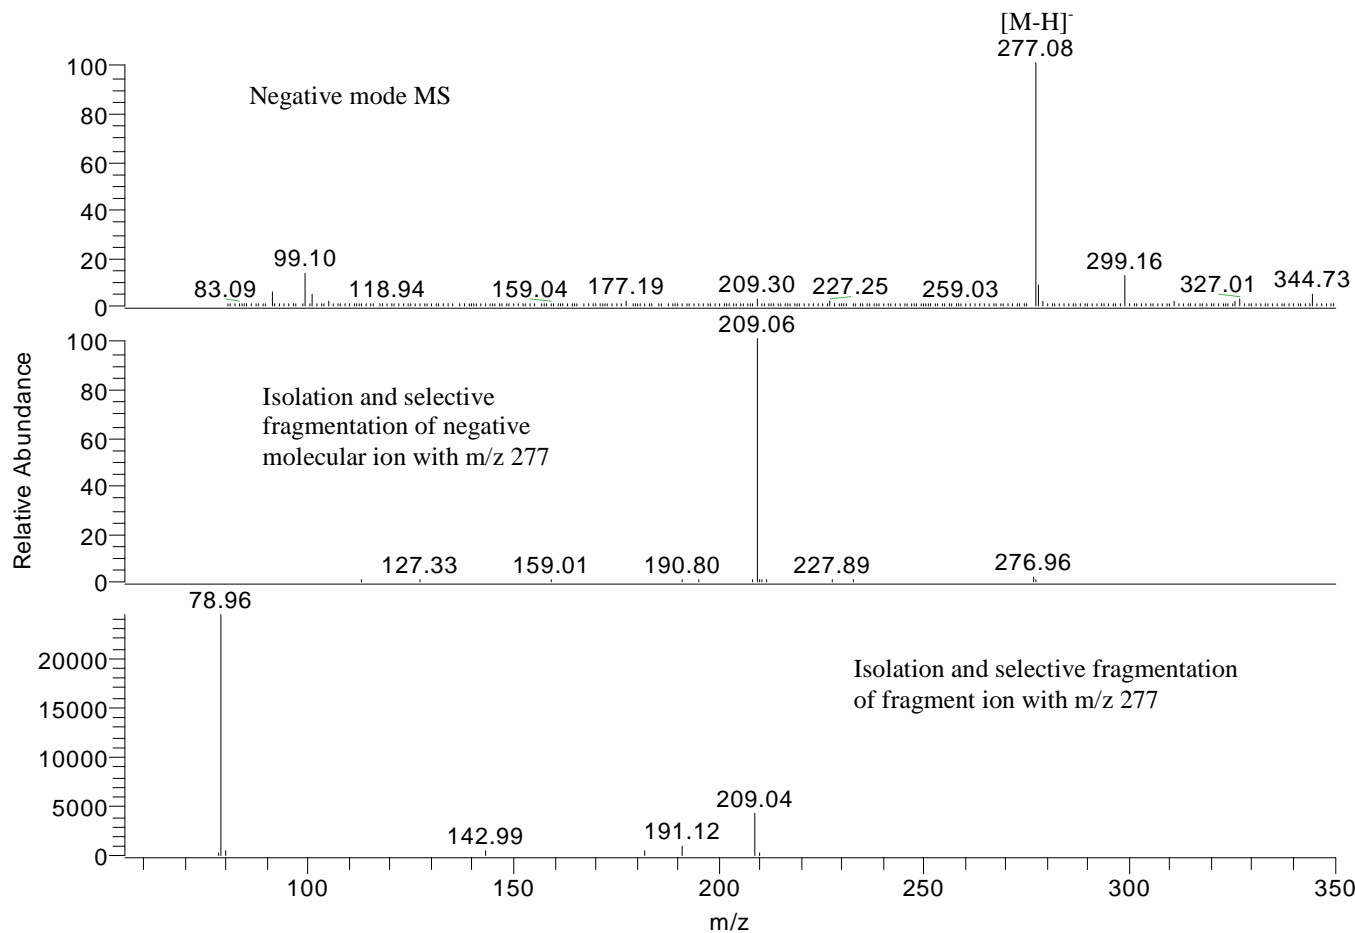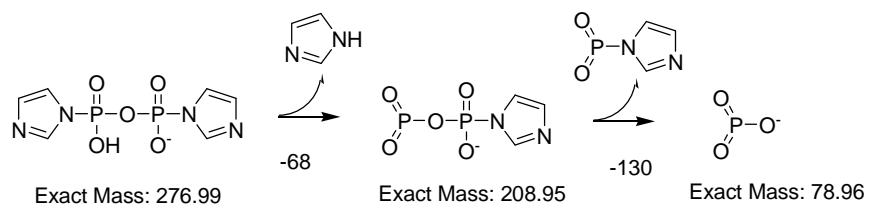

Negative mode fragmentation scheme

ESI Positive mode MS and selective MS<sup>2</sup> fragmentation of compound **7a**

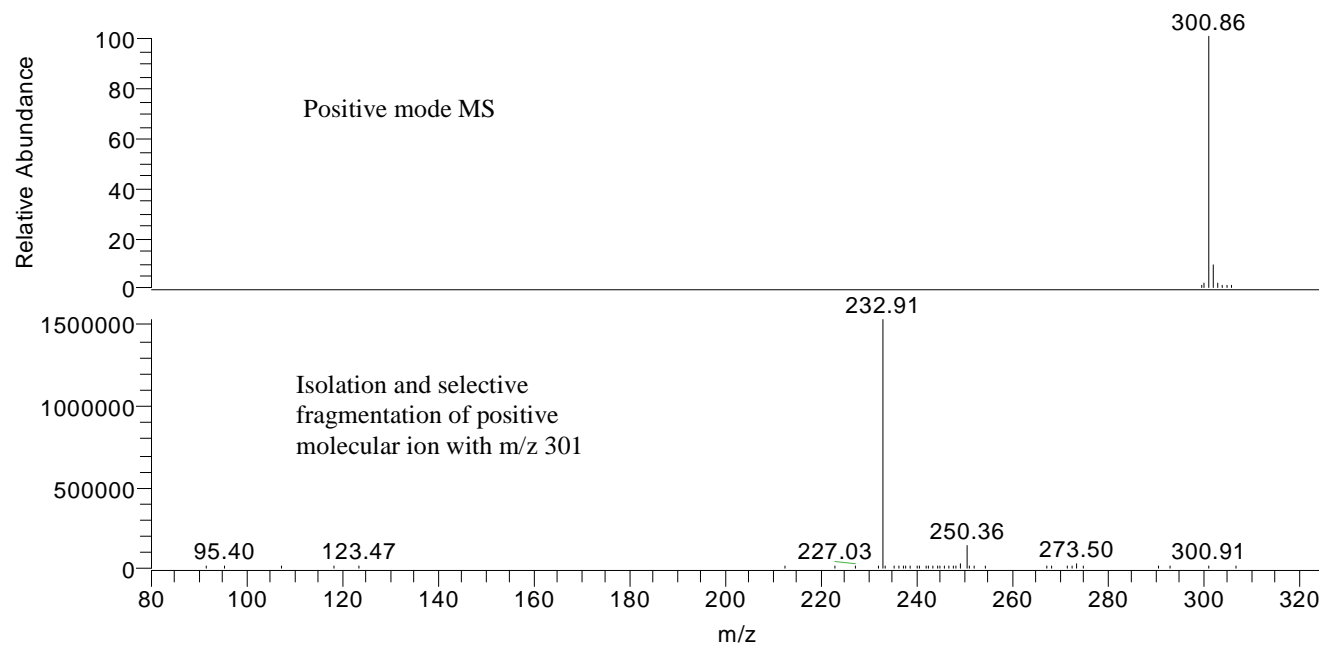

NL: 1.23E7  
 ImPOPI<sub>m</sub>\_Na<sub>inf</sub>#1053-  
 1159 RT: 10.89-11.68 AV:  
 107 T: + c ESI Full ms  
 [299.00-306.00]

NL: 1.53E6  
 ImPOPI<sub>m</sub>\_Na<sub>inf</sub>#1455-  
 1509 RT: 18.27-19.01 AV:  
 55 T: + c ESI Full ms<sup>2</sup>  
 300.90@cid30.00  
 [80.00-325.00]

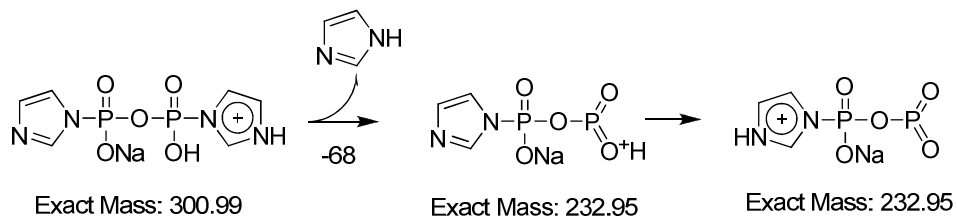

Positive mode fragmentation scheme

<sup>1</sup>H NMR of the di-sodium salt of compound **7b** in DMSO-d<sub>6</sub>/D<sub>2</sub>O

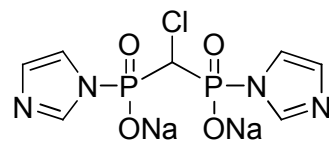

Current Data Parameters  
NAME 070917 ImPCHCLPIm 2Na  
EXPNO 10  
PROCNO 1

F2 - Acquisition Parameters  
Date\_ 20070919  
Time 10.47  
INSTRUM spect  
PROBHD 5 mm BBO BB-1H  
PULPROG zg30  
TD 43208  
SOLVENT DMSO  
NS 16  
DS 2  
SWH 4990.020 Hz  
FIDRES 0.115488 Hz  
AQ 4.3294916 sec  
RG 1625.5  
DW 100.200 usec  
DE 6.50 usec  
TE 298.2 K  
DL 0.10000000 sec  
TD0 1

----- CHANNEL f1 -----  
NUC1 1H  
P1 10.00 usec  
PL1 9.20 dB  
SFO1 299.7518511 MHz

F2 - Processing parameters  
SI 32768  
SF 299.7500055 MHz  
WDW EM  
SSB 0  
LB 0.30 Hz  
GB 0  
PC 1.00

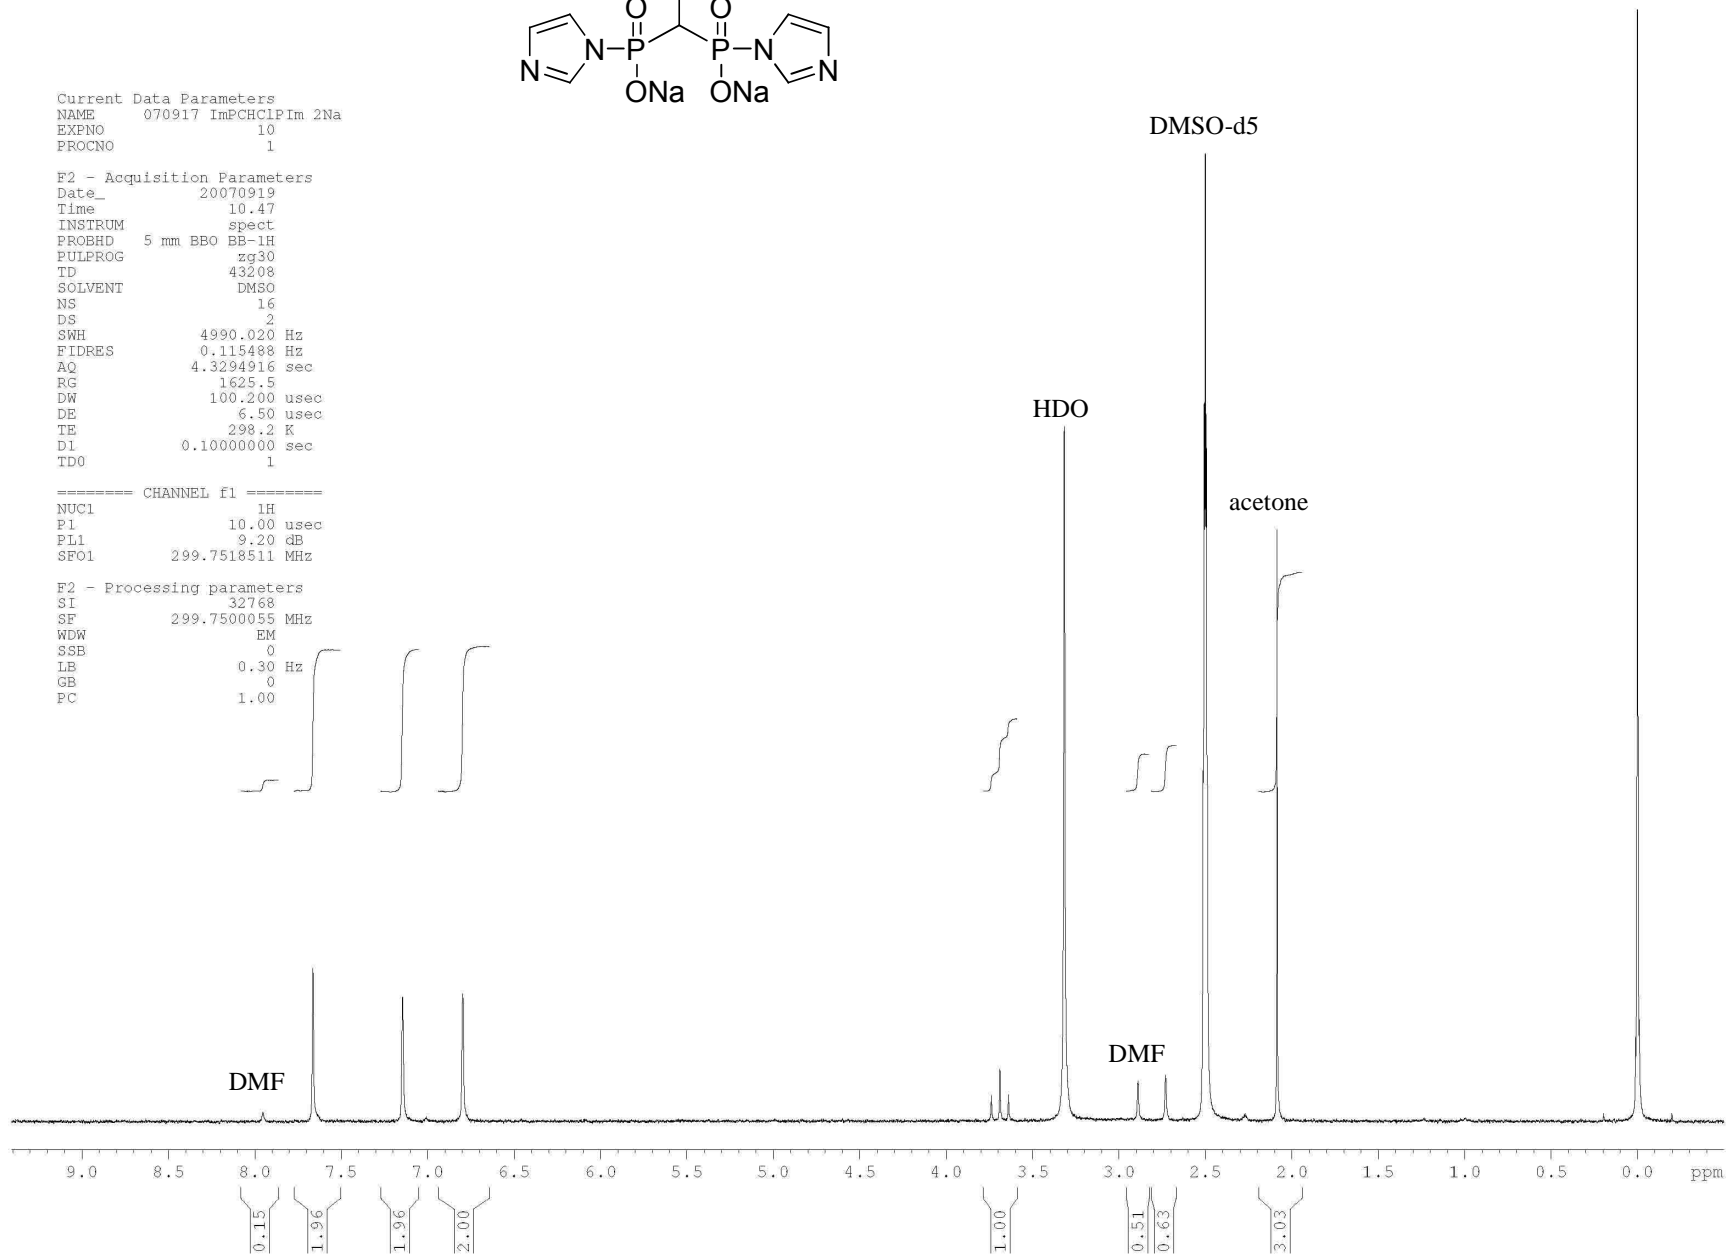



<sup>31</sup>P NMR (proton decoupled) of the di-sodium salt of compound **7b** in DMSO-d6/D<sub>2</sub>O

31P dec of final product

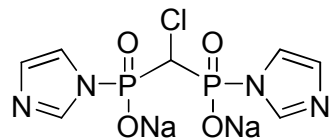

Current Data Parameters  
NAME 070917 ImFCHClPm 2Na  
EXPNO 20  
PROCNO 1

F2 - Acquisition Parameters  
Date\_ 20070919  
Time 11.02  
INSTRUM spect  
PROBHD 5 mm BBO BB-1H  
PULPROG zgpg30  
TD 126514  
SOLVENT DMSO  
NS 601  
DS 4  
SWH 48661.801 Hz  
FIDRES 0.384636 Hz  
AQ 1.2999614 sec  
RG 16384  
DW 10.275 usec  
DE 6.50 usec  
TE 298.2 K  
D1 0.10000000 sec  
d11 0.03000000 sec  
DELTA 0.00000000 sec  
TD0 1

===== CHANNEL f1 =====  
NUC1 31P  
P1 5.00 usec  
PL1 12.70 dB  
SFO1 121.3422374 MHz

===== CHANNEL f2 =====  
CPDPRG2 waltz16  
NUC2 1H  
PCPD2 100.00 usec  
PL12 29.00 dB  
PL13 120.00 dB  
PL2 9.00 dB  
SFO2 299.7511990 MHz

F2 - Processing parameters  
SI 32768  
SF 121.3410240 MHz  
WDW EM  
SSE 0  
LB 1.00 Hz  
GB 0  
PC 1.40

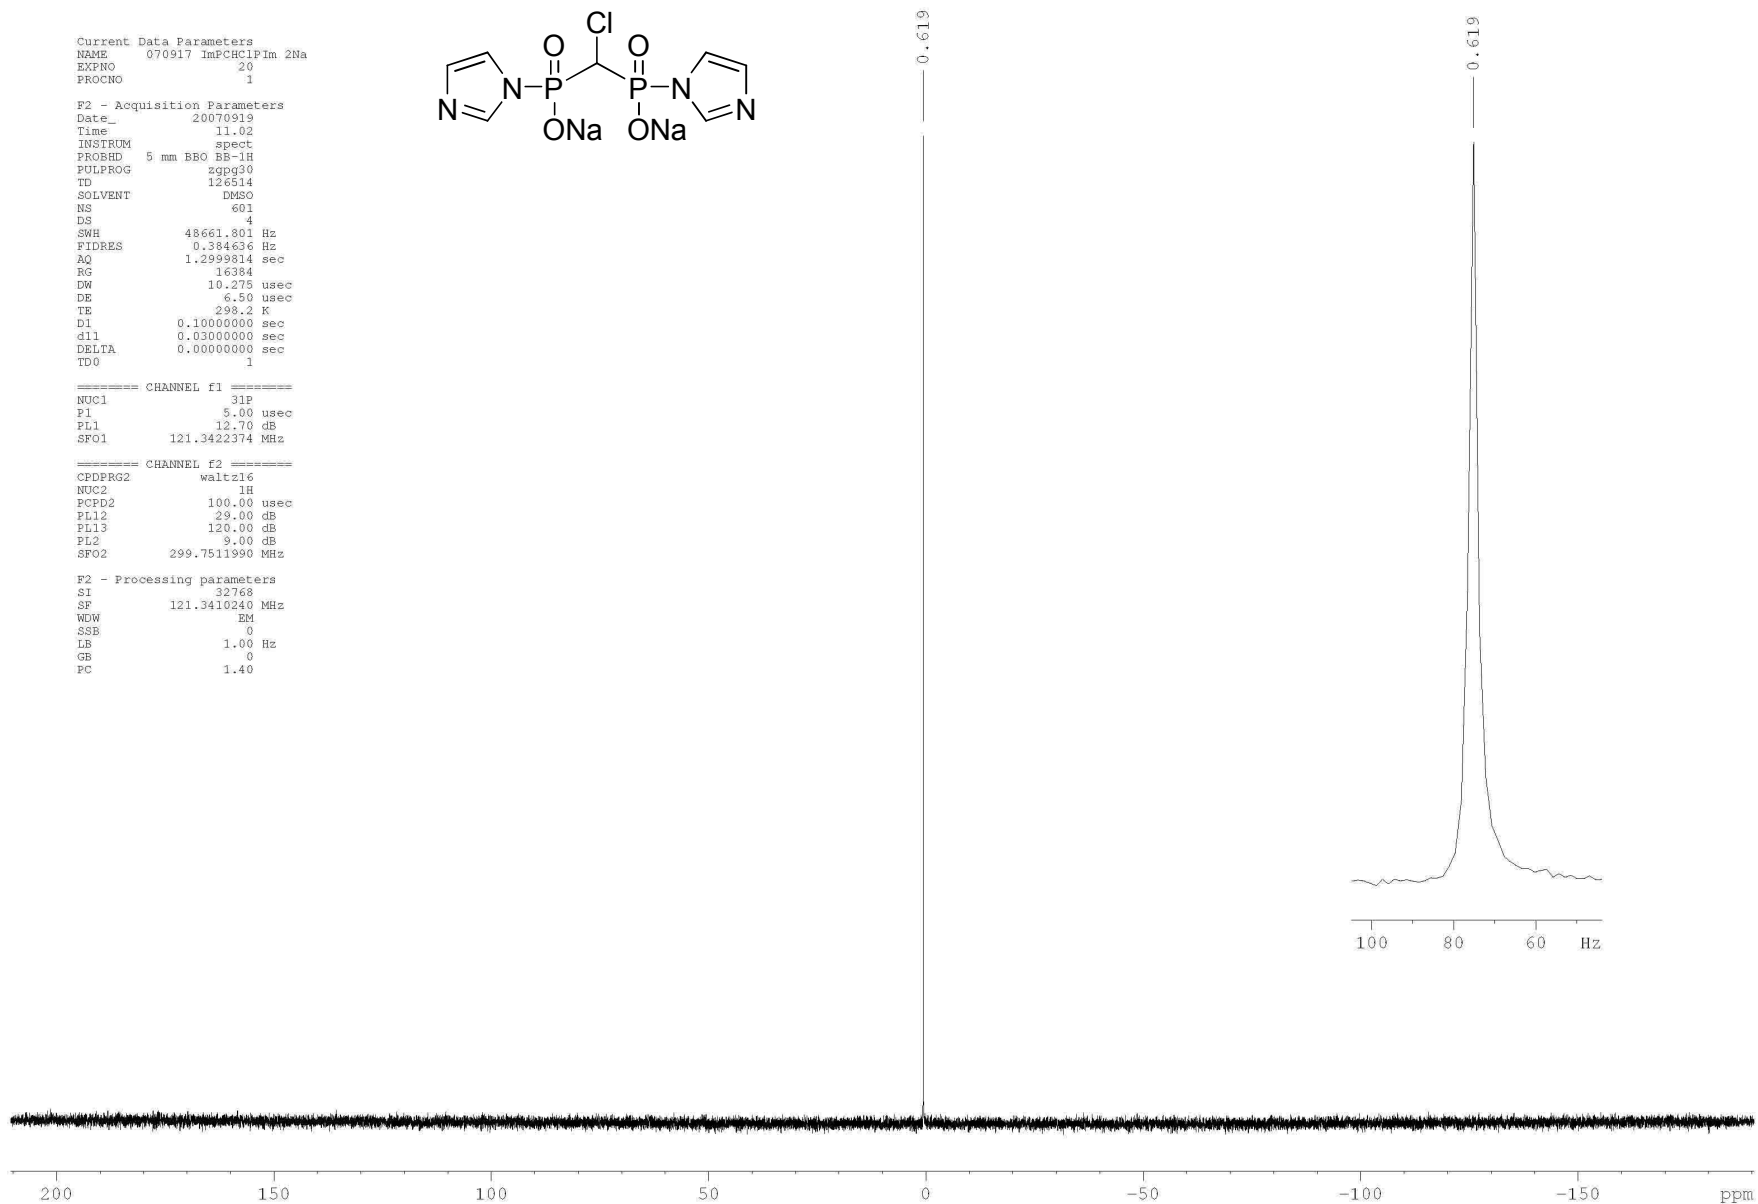

<sup>31</sup>P NMR (proton coupled) of the di-sodium salt of compound **7b** in DMSO-d<sub>6</sub>/D<sub>2</sub>O

<sup>31</sup>P of final product

Current Data Parameters  
NAME 070917 ImpCHClPIm 2Na  
EXPNO 30  
PROCNO 1

F2 - Acquisition Parameters  
Date\_ 20070919  
Time 11.47  
INSTRUM spect  
PROBHD 5 mm BBO BB-1H  
PULPROG zg30  
TD 126514  
SOLVENT DMSO  
NS 5001  
DS 4  
SWH 48661.801 Hz  
FIDRES 0.384636 Hz  
AQ 1.2999814 sec  
RG 18390.4  
DW 10.275 usec  
DE 6.50 usec  
TE 298.2 K  
D1 0.10000000 sec  
TD0 1

==== CHANNEL f1 =====  
NUC1 31P  
P1 5.00 usec  
PL1 12.70 dB  
SFO1 121.3422374 MHz

F2 - Processing parameters  
SI 32768  
SF 121.3410240 MHz  
WDW EM  
SSB 0  
LB 2.00 Hz  
GB 0  
PC 1.40

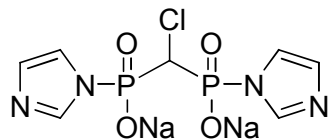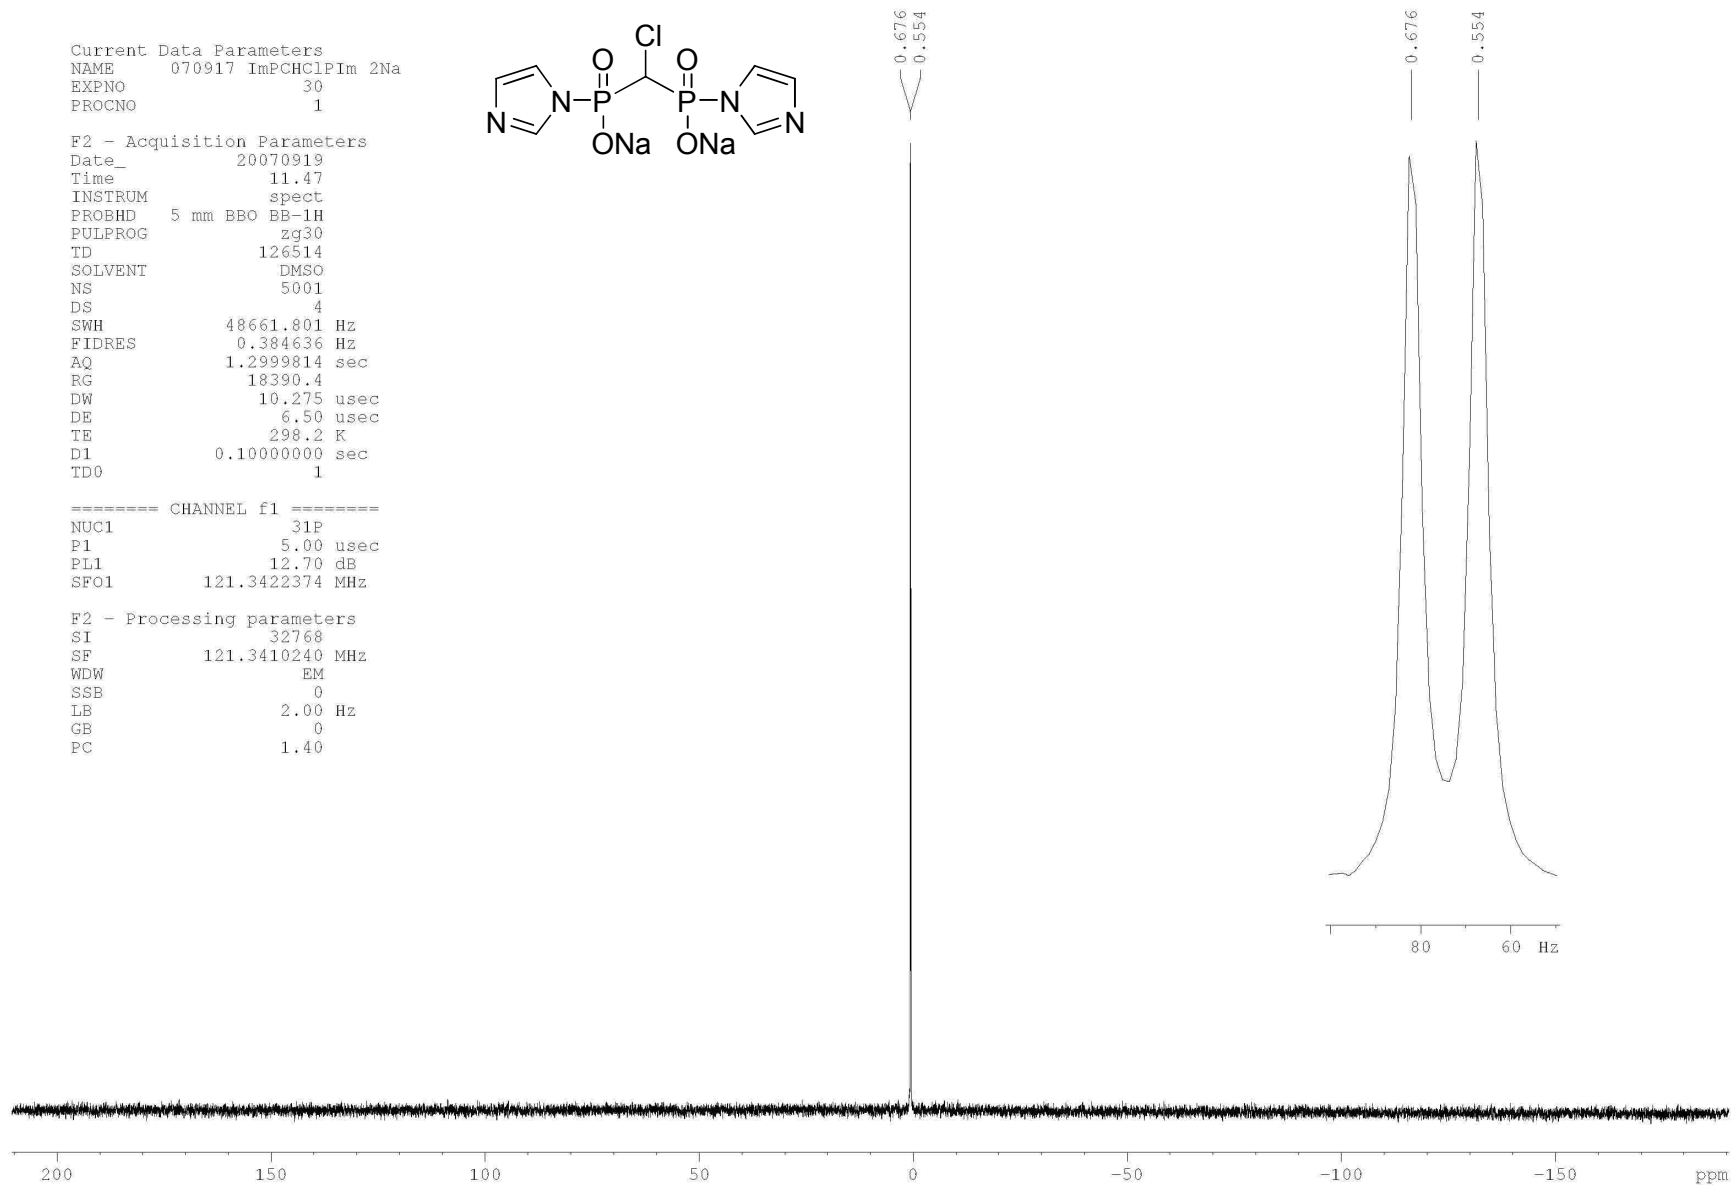

# LCMS of the di-sodium salt of compound 7b

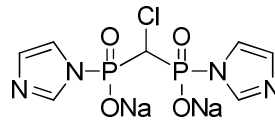

040825\_lmPPCHCIPlm\_Na\_040909172926

9/9/2004 5:29:26 PM

RT: 0.00 - 12.99 SM: 3B

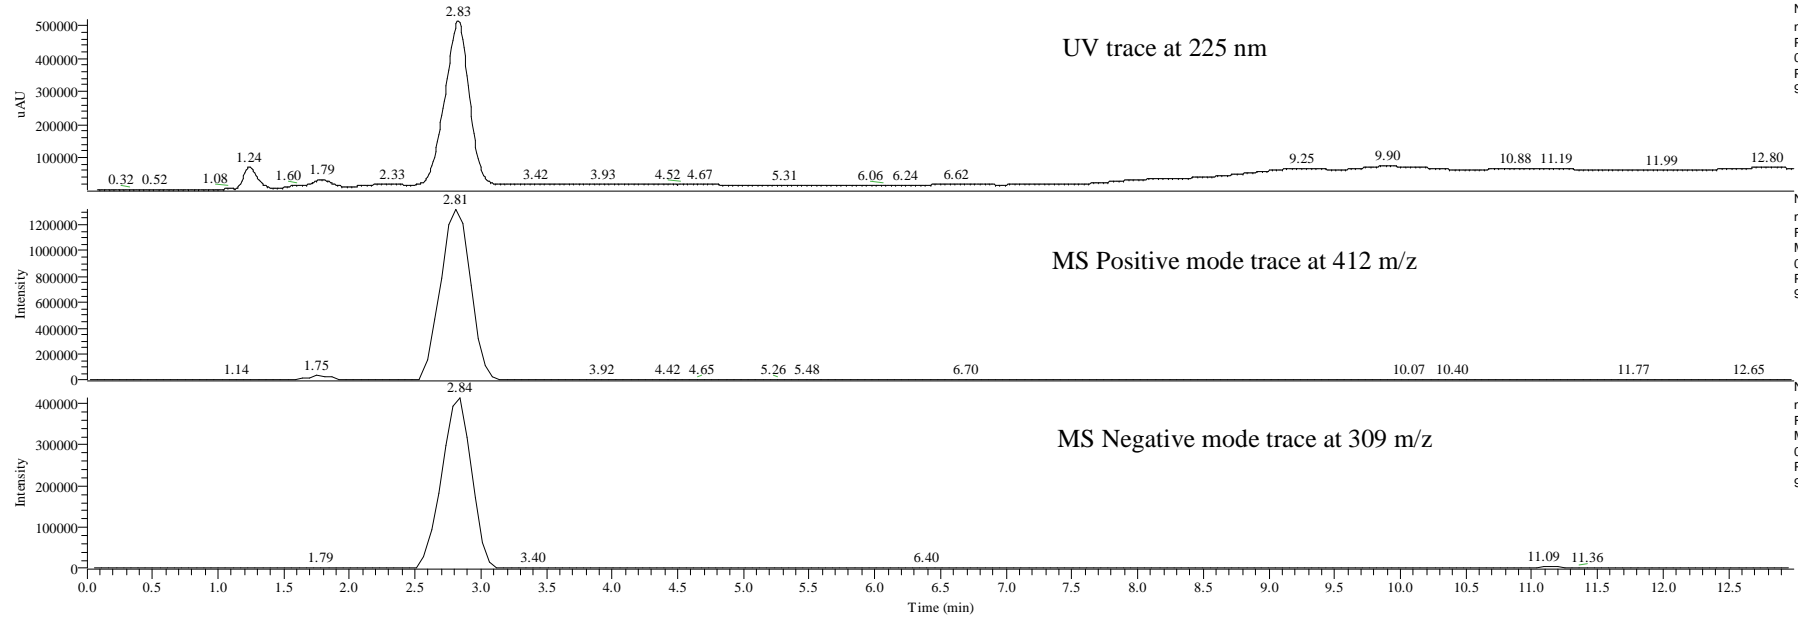

NL: 5.16E5  
nm=224.4-225.4  
PDA  
040825\_lmPPCHCI  
Plm\_Na\_040909172  
926

NL: 132E6  
m/z= 410.90-412.57  
F: + c ESI Full ms  
MS  
040825\_lmPPCHCI  
Plm\_Na\_040909172  
926

NL: 4.12E5  
m/z= 307.63-312.63  
F: - c ESI Full ms  
MS  
040825\_lmPPCHCI  
Plm\_Na\_040909172  
926

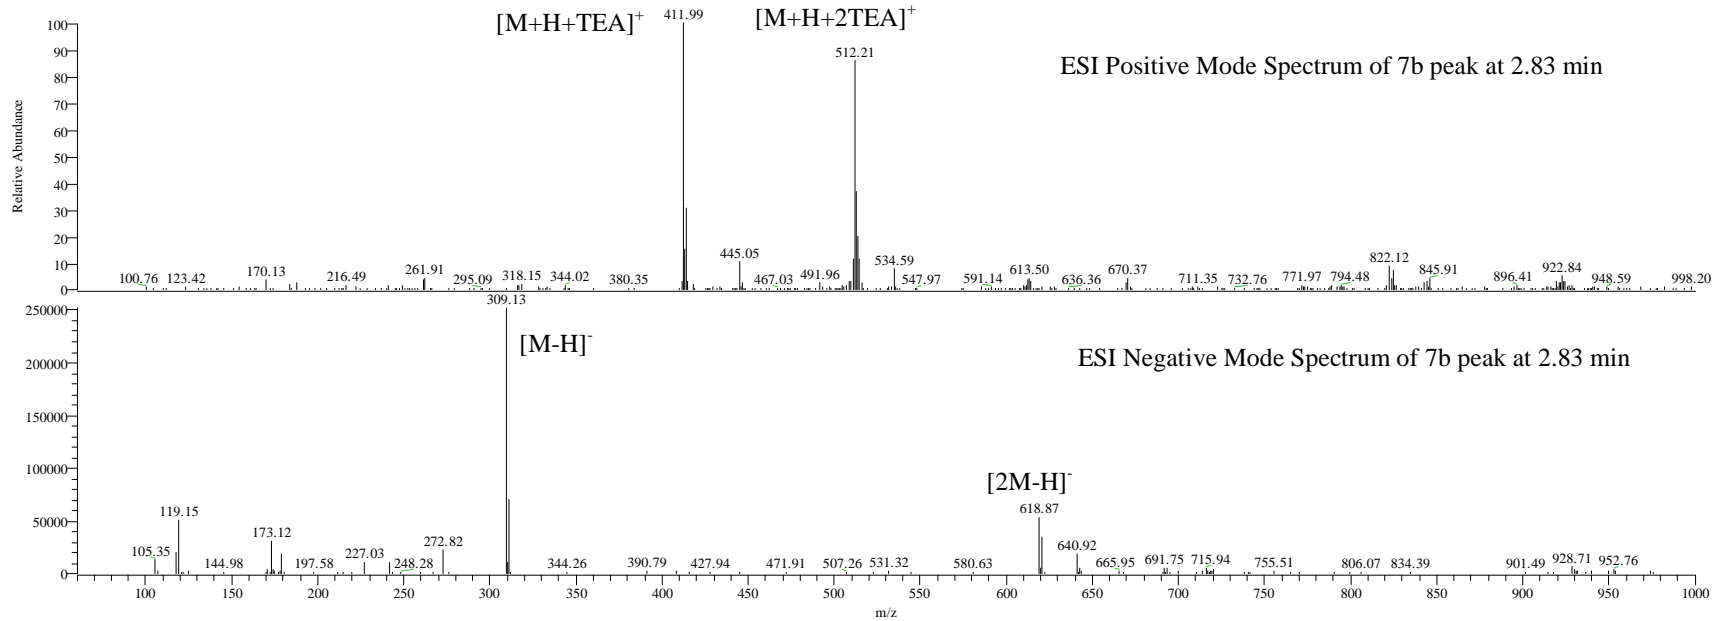

NL: 1.18E6  
040825\_lmPPCHCIPlm\_Na\_040  
909172926#96-103 RT:  
2.70-2.87 AV: 4 SB: 7  
MS  
2.40-2.53 , 3.12-3.31 T: + c  
ESI Full ms [60.00-1000.00]

NL: 2.51E5  
040825\_lmPPCHCIPlm\_Na\_040  
909172926#97-107 RT:  
2.73-2.95 AV: 5 SB: 10  
MS  
2.34-2.53 , 3.07-3.34 F: - c ESI  
Full ms

LCMS of the di-sodium salt of compound 7c

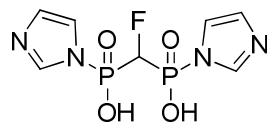

Exact Mass: 294.01

040910\_lmPCHFPIm\_MeOH\_25min\_040910151220

9/10/2004 3:12:20 PM

RT: 0.00 - 12.20 SM: 3B

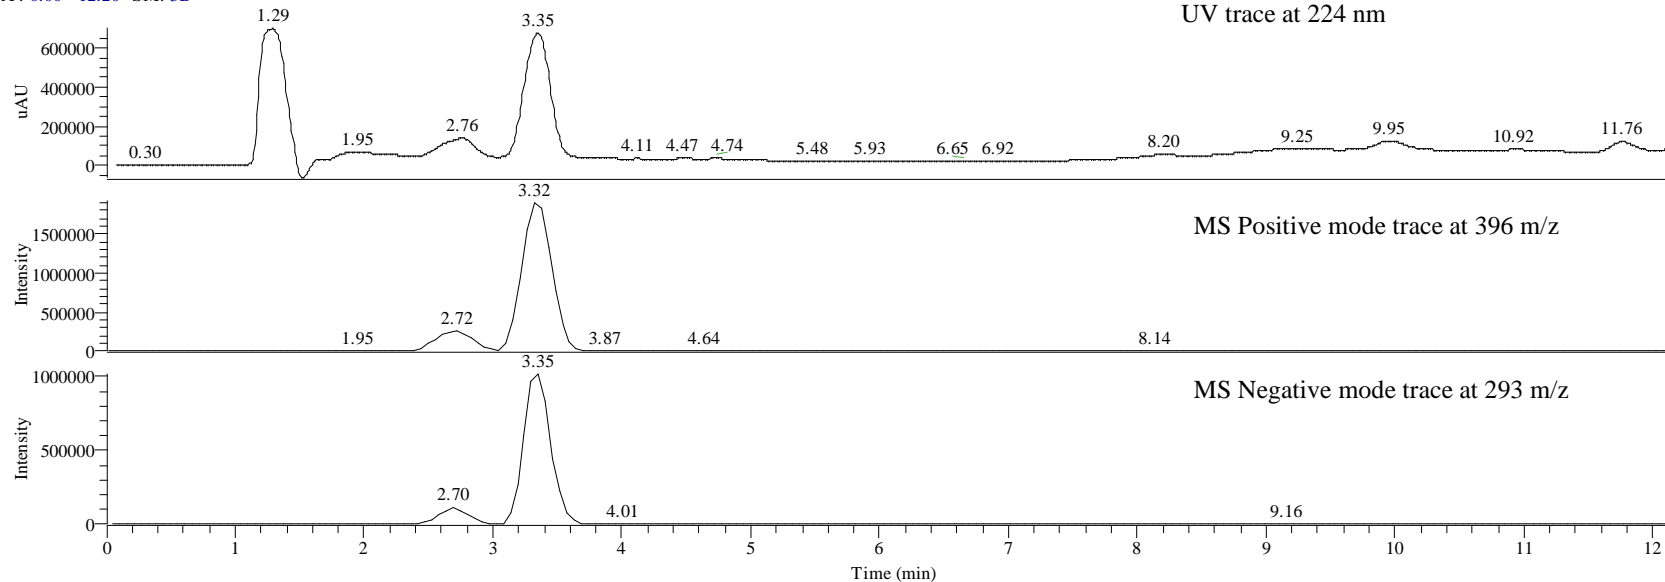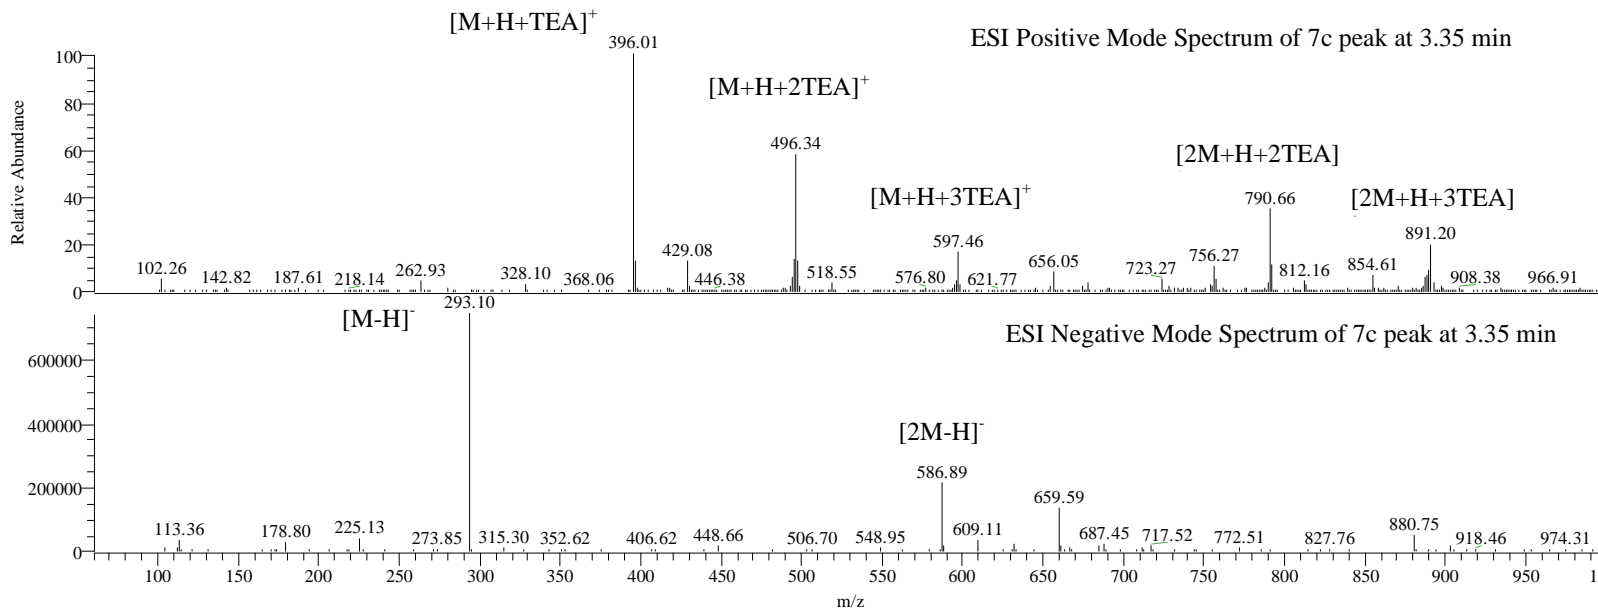

<sup>1</sup>H NMR of the di-sodium salt of compound **7d** in DMSO-d<sub>6</sub>

1H of Na salt in dms0 9 mg in 0.7 ml

Current Data Parameters  
NAME MYIV66\_ImPCCl2PIm\_Na  
EXPNO 10  
PROCNO 1

F2 - Acquisition Parameters  
Date\_ 20081017  
Time 11.10  
INSTRUM spect  
PROBHD 5 mm BBO BB-1H  
PULPROG zg30  
TD 51850  
SOLVENT DMSO  
NS 18  
DS 2  
SWH 5081.301 Hz  
FIDRES 0.098000 Hz  
AQ 5.1020899 sec  
RG 1290.2  
DW 98.400 usec  
DE 6.50 usec  
TE 298.2 K  
D1 0.10000000 sec  
TD0 1

===== CHANNEL f1 =====  
NUC1 1H  
P1 10.00 usec  
PL1 9.20 dB  
SFO1 299.7019490 MHz

F2 - Processing parameters  
SI 32768  
SF 299.7000000 MHz  
WDW EM  
SSB 0  
LB 0.30 Hz  
GB 0  
PC 1.00

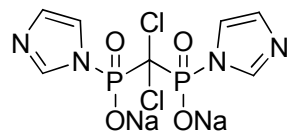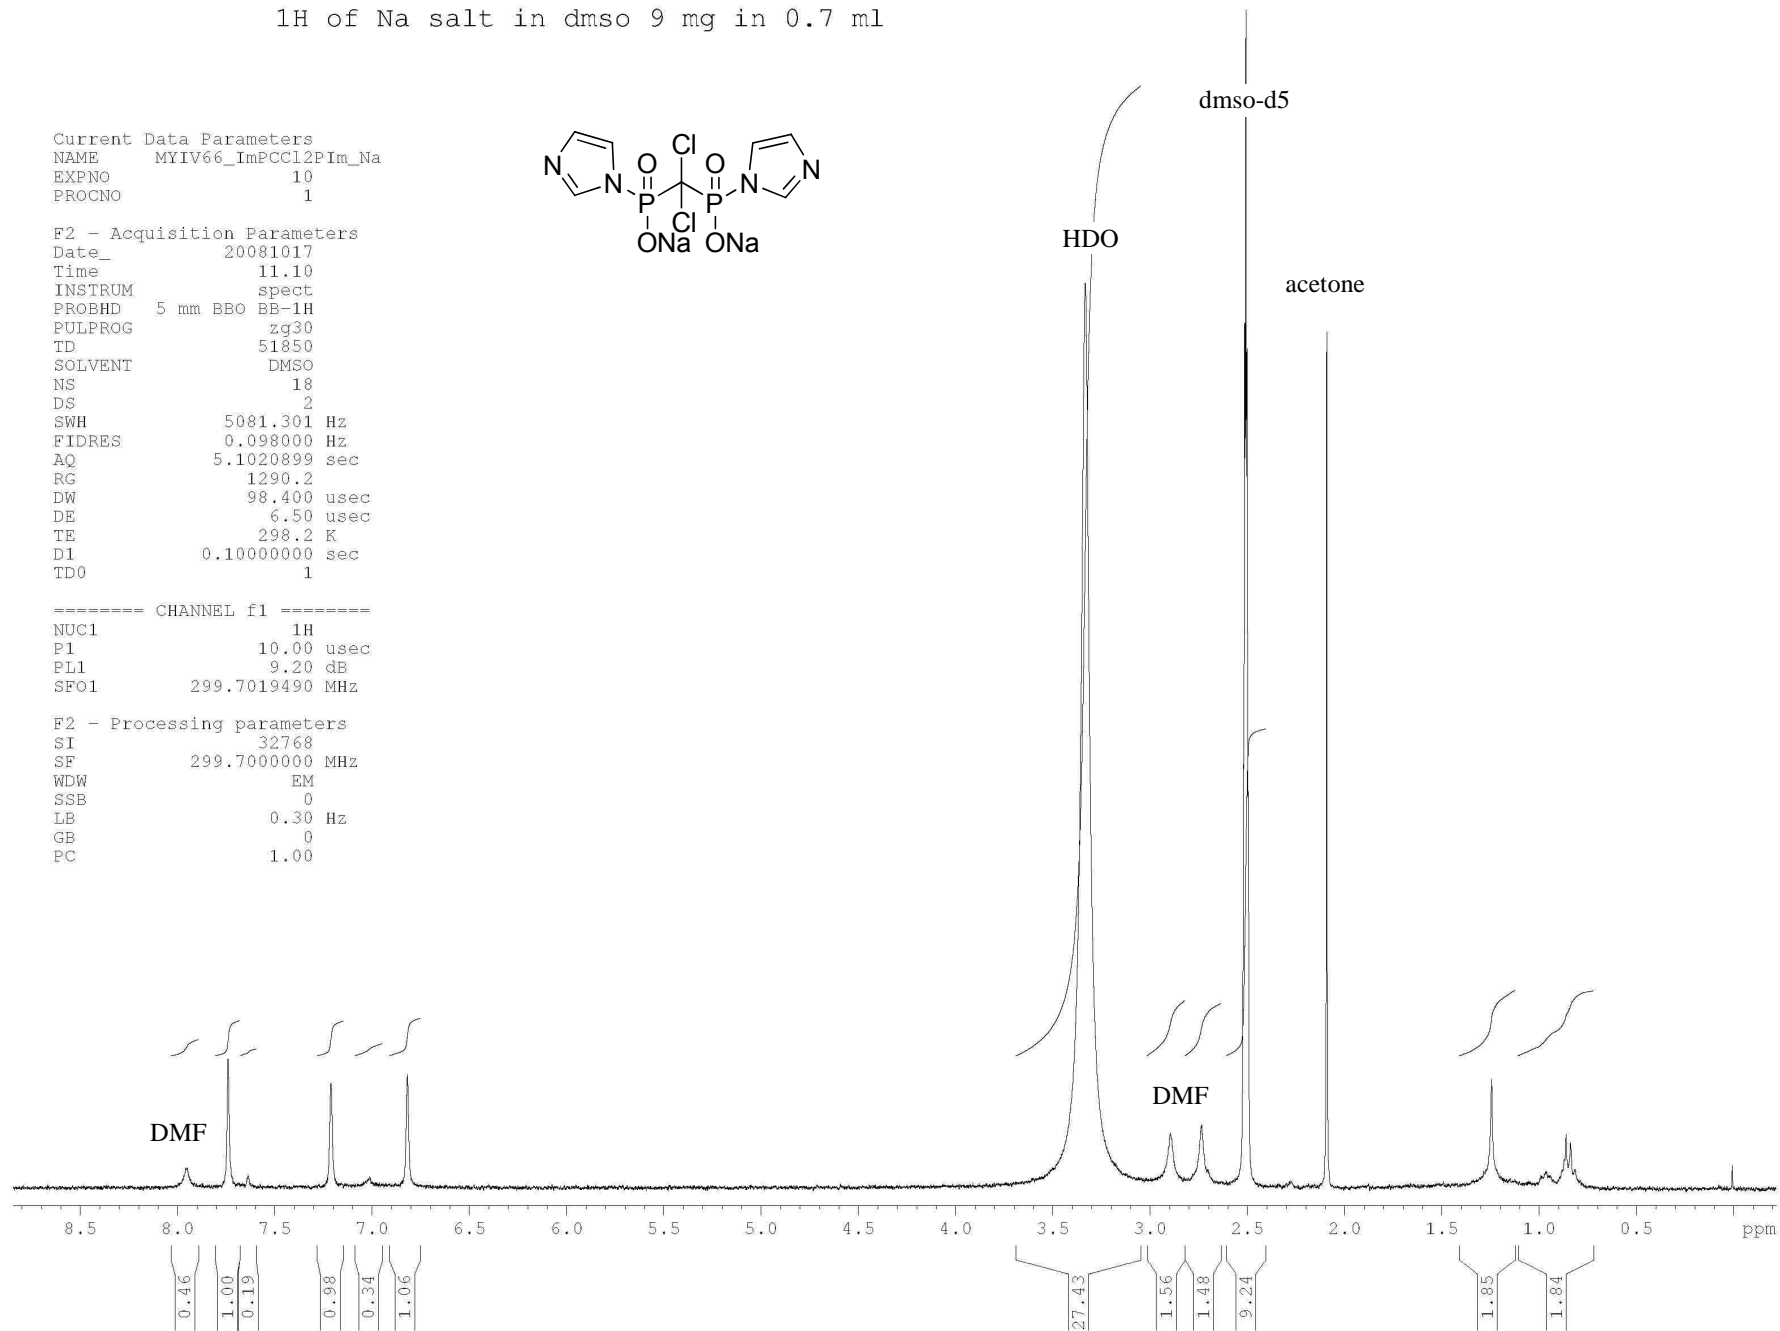

<sup>31</sup>P NMR (proton decoupled) of the di-sodium salt of compound **7d** in DMSO-d<sub>6</sub>

31P dec of Na salt in dms0 9 mg in 0.7 ml

```
Current Data Parameters
NAME MYIV66_impCCl2Pim_Na
EXPNO 20
PROCNO 1

F2 - Acquisition Parameters
Date_ 20081017
Time 11:13
INSTRUM spect
PROBHD 5 mm BBO BB-1H
PULPROG zgpg30
TD 136248
SOLVENT DMSO
NS 454
DS 4
SWH 48661.801 Hz
FIDRES 0.357156 Hz
AQ 1.3999982 sec
RG 16384
DW 10.275 usec
DE 6.50 usec
TE 298.2 K
D1 0.10000000 sec
d11 0.03000000 sec
DELTA 0.00000000 sec
TD0 1

===== CHANNEL f1 =====
NUC1 31P
P1 7.00 usec
PL1 12.70 dB
SFO1 121.3207840 MHz

===== CHANNEL f2 =====
CPDPRG2 waltz16
NUC2 1H
PCPD2 100.00 usec
PL12 29.00 dB
PL13 120.00 dB
PL2 9.00 dB
SFO2 299.7011988 MHz

F2 - Processing parameters
SI 32768
SF 121.3207388 MHz
WDW EM
SSB 0
LB 1.00 Hz
GB 0
PC 1.40
```

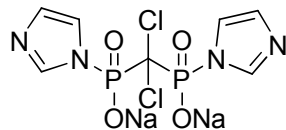

-0.658

proton  
decoupled

proton  
coupled

-0.658

-0.659

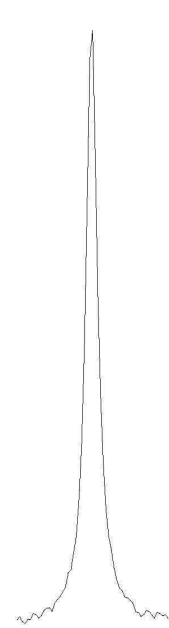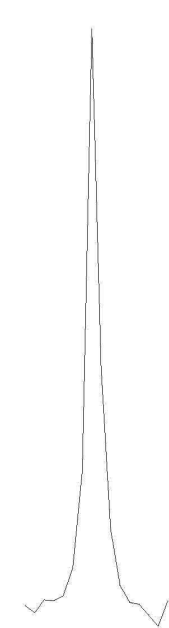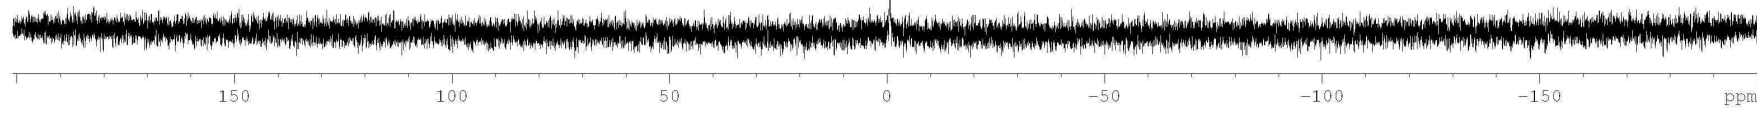

# LCMS of the di-sodium salt of compound 7d

\\90.0.0.63\csl\...MYIV66\_impCC12plm\_ol  
5 mg/ml in 20 mM TEAA

5/27/2009 6:00:40 PM

RT: 0.00 - 12.97 SM: 3B

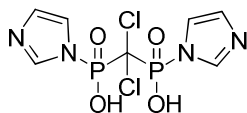

Exact Mass: 343.94

UV trace at 225 nm

NL: 7.28E5  
nm=223.5-224.5  
PDA  
MYIV66\_impCC12  
plm\_ol

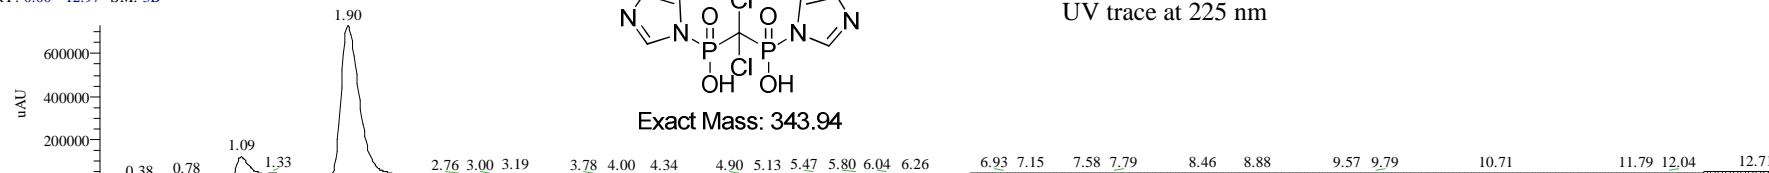

MS Positive mode trace at 446 m/z

NL: 2.00E7  
m/z=  
444.29-449.38 F: +  
c ESIFull ms  
MS  
MYIV66\_impCC12  
plm\_ol

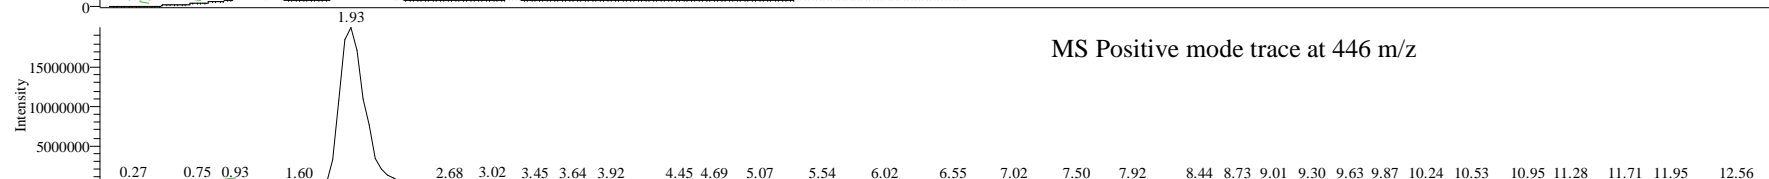

MS Negative mode trace at 343 m/z

NL: 7.83E6  
m/z=  
34198-345.93 F: -  
c ESIFull ms  
MS  
MYIV66\_impCC12  
plm\_ol

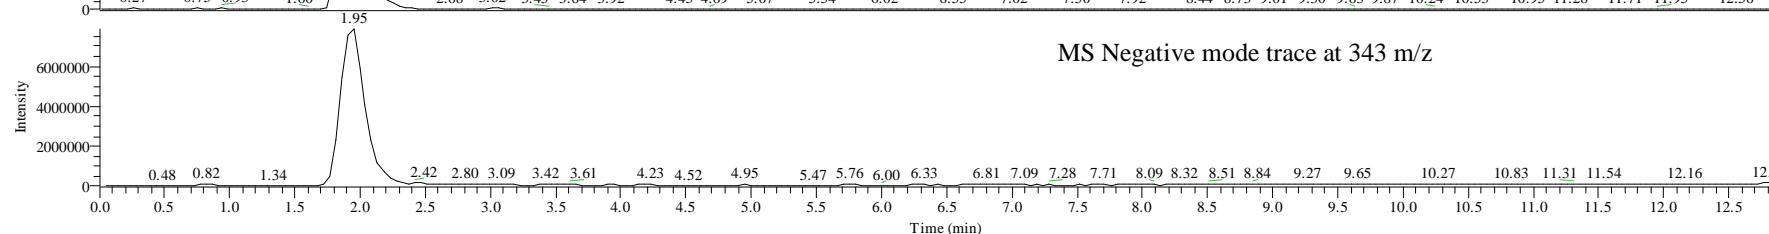

$[M+H+2TEA]^+$

ESI Positive Mode Spectrum of 7d peak at 1.93 min

NL: 1.12E7  
MYIV66\_impCC12plm\_ol  
d#76-87 RT: 1.84-2.06  
AV: 6 SB: 14 1.48-1.74  
, 2.21-2.54 F: + c ESI  
Full ms

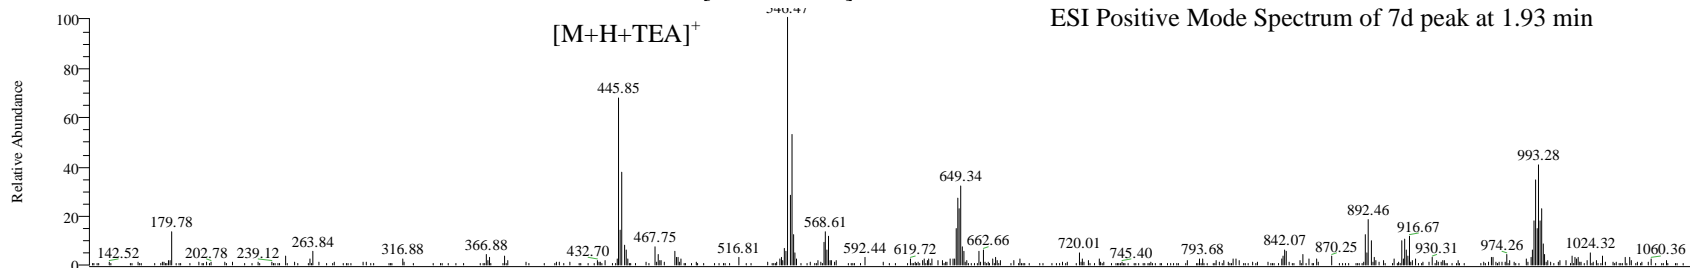

$[M-H]^-$

ESI Negative Mode Spectrum of 7d peak at 1.93 min

NL: 3.13E6  
MYIV66\_impCC12plm\_ol  
d#75-86 RT: 1.81-2.04  
AV: 6 SB: 12 1.46-1.72  
, 2.18-2.42 F: - c ESI  
Full ms

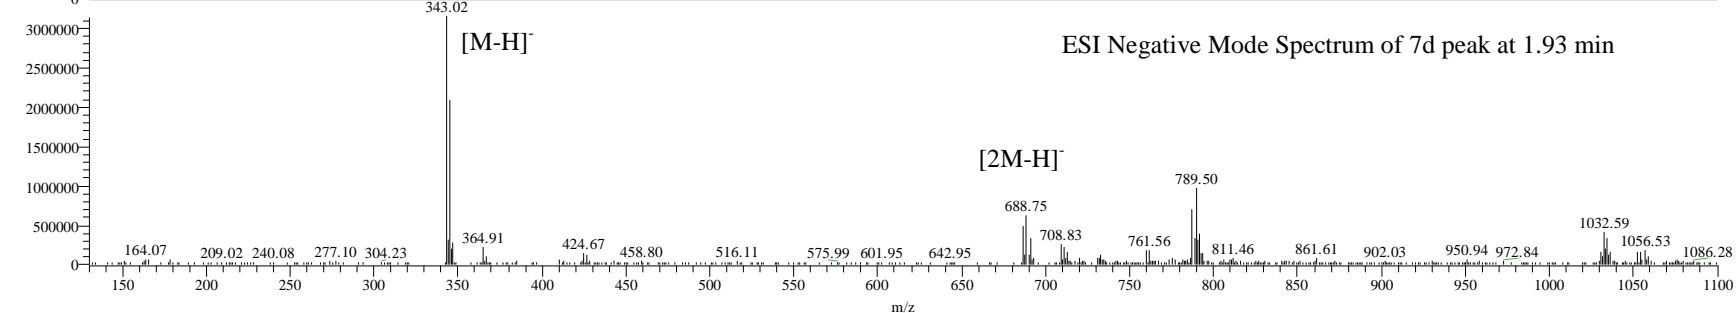

$[2M-H]^-$

# 1H NMR spectrum of Ap4A sodium salt, **3a** in D<sub>2</sub>O

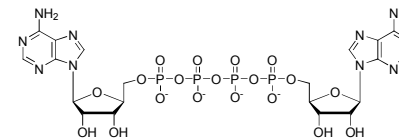

1H NMR of Ap4A Na salt in D2O batch 070420

## Current Data Parameters

NAME 070420\_Ap4A  
EXPNO 20  
PROCNO 1

## F2 - Acquisition Parameters

Date\_ 20070531  
Time 13.27  
INSTRUM spect  
PROBHD 5 mm BBO BB-1H  
PULPROG zg  
TD 65536  
SOLVENT D2O  
NS 16  
DS 2  
SWH 6172.839 Hz  
FIDRES 0.094190 Hz  
AQ 5.3084660 sec  
RG 456.1  
DW 81.000 usec  
DE 6.50 usec  
TE 298.2 K  
D1 0.1000000 sec  
TD0 1

## CHANNEL f1

NUC1 1H  
P1 10.00 usec  
PL1 9.20 dB  
SFO1 299.7518511 MHz

## F2 - Processing parameters

SI 32768  
SF 299.7500000 MHz  
WDW EM  
SSB 0  
LB 0.30 Hz  
GB 0  
PC 1.00

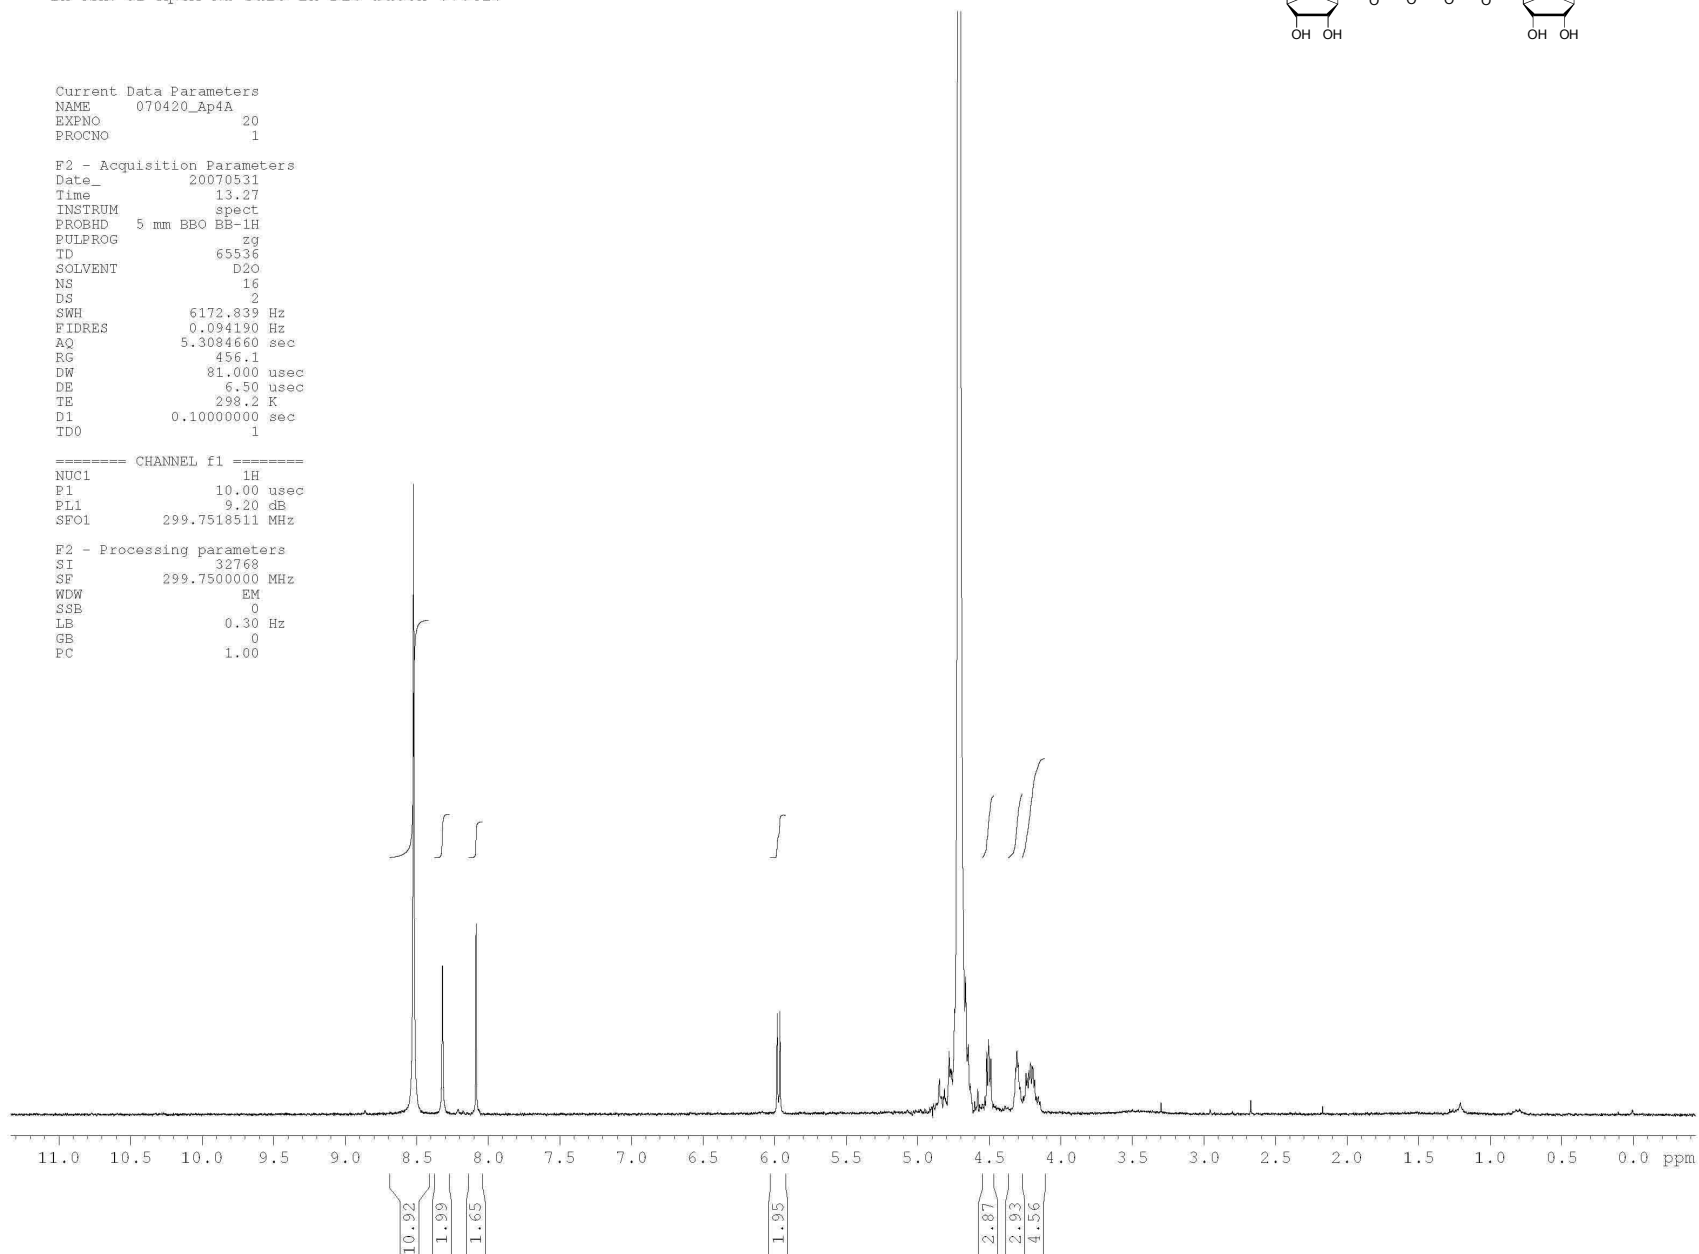



<sup>31</sup>P (proton decoupled) NMR spectrum of Ap<sub>4</sub>A sodium salt, **3a** in D<sub>2</sub>O

Current Data Parameters  
 NAME 070420\_Ap4A  
 EXPNO 30  
 PROCNO 1

F2 - Acquisition Parameters  
 Date\_ 20070531  
 Time 12.50  
 INSTRUM spect  
 PROBHD 5 mm BBO BB-1H  
 PULPROG zg  
 TD 126514  
 SOLVENT D2O  
 NS 94  
 DS 4  
 SMH 48661.801 Hz  
 FIDRES 0.384636 Hz  
 AQ 1.2999814 sec  
 RG 23170.5  
 DW 10.275 usec  
 DE 6.50 usec  
 TE 298.2 K  
 D1 0.20000000 sec  
 TD0 1

==== CHANNEL f1 =====  
 NUC1 31P  
 P1 5.00 usec  
 PL1 12.70 dB  
 SFO1 121.3349571 MHz

==== CHANNEL f2 =====  
 CPDPRG2 waltz16  
 NUC2 1H  
 PCPD2 100.00 usec  
 PL12 29.00 dB  
 PL13 120.00 dB  
 PL2 9.00 dB  
 SFO2 299.7511990 MHz

F2 - Processing parameters  
 SI 32768  
 SF 121.3410240 MHz  
 WDW EM  
 SSB 0  
 LB 1.00 Hz  
 GB 0  
 PC 1.40

-11.033  
 -11.118  
 -11.156  
 -11.220  
 -11.262  
 -11.341  
 -22.471  
 -22.553  
 -22.594  
 -22.658  
 -22.695  
 -22.785

-1349.081  
 -1353.629  
 -1361.388  
 -1366.507  
 -2736.628  
 -2741.617  
 -2749.344  
 -2753.889

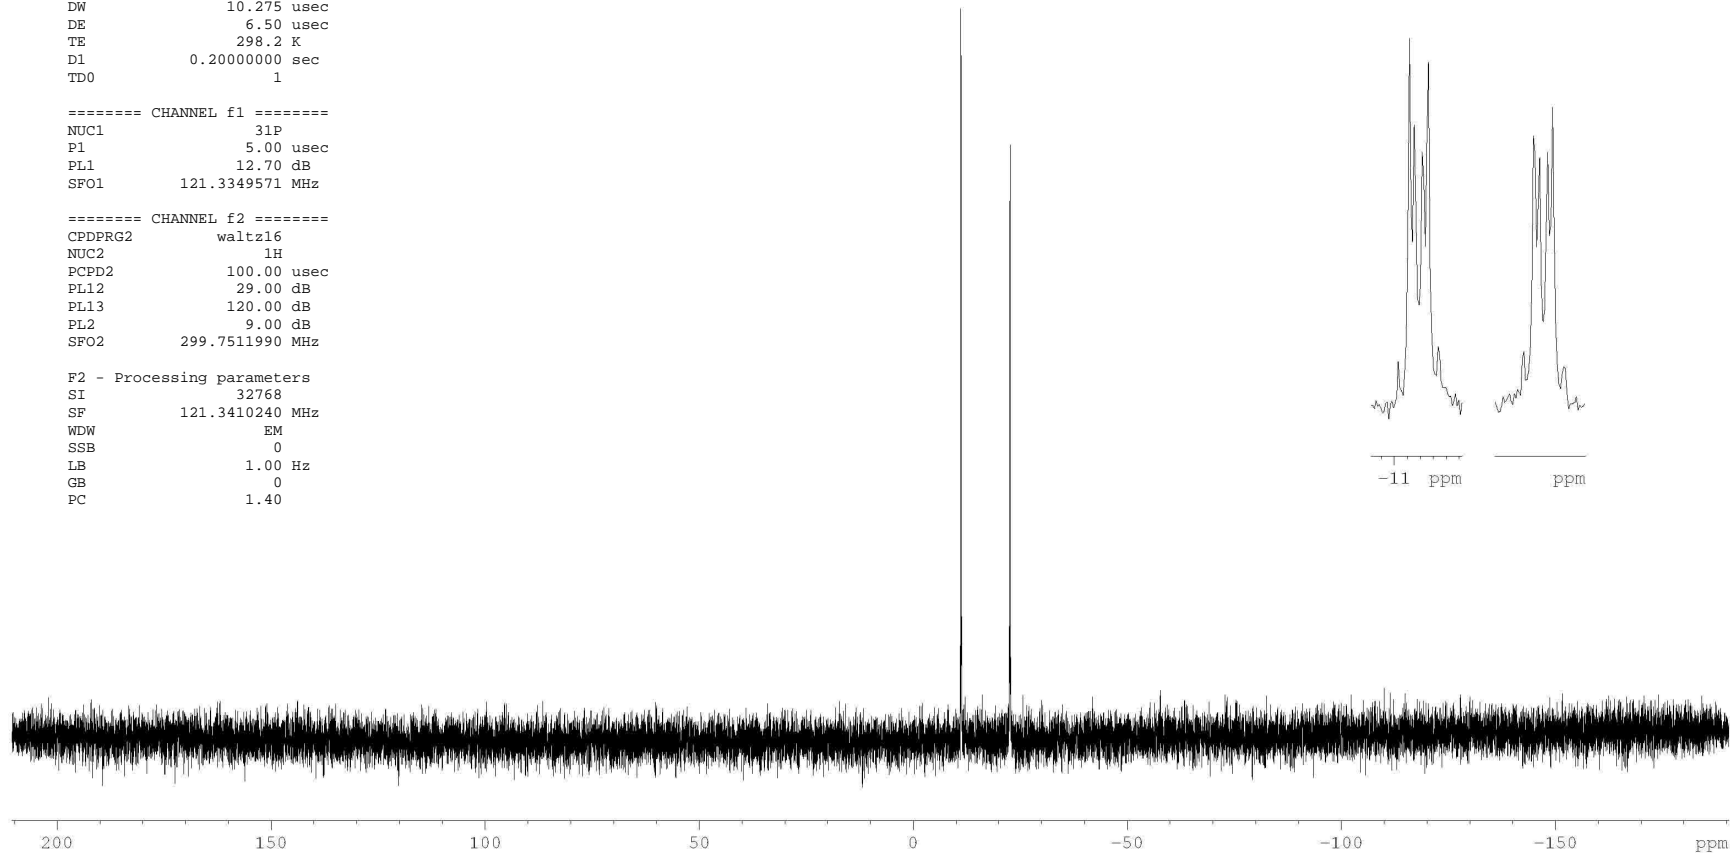

<sup>31</sup>P (proton coupled) NMR spectrum of Ap<sub>4</sub>A sodium salt, **3a** in D<sub>2</sub>O

Current Data Parameters

NAME 070420\_Ap4A  
EXPNO 20  
PROCNO 1

F2 - Acquisition Parameters

Date\_ 20070531  
Time 12.50  
INSTRUM spect  
PROBHD 5 mm BBO BB-1H  
PULPROG zg  
TD 126514  
SOLVENT D2O  
NS 94  
DS 4  
SWH 48661.801 Hz  
FIDRES 0.384636 Hz  
AQ 1.2999814 sec  
RG 23170.5  
DW 10.275 usec  
DE 6.50 usec  
TE 298.2 K  
D1 0.20000000 sec  
TDO 1

==== CHANNEL f1 =====

NUC1 31P  
P1 5.00 usec  
PL1 12.70 dB  
SFO1 121.3349571 MHz

F2 - Processing parameters

SI 32768  
SF 121.3410240 MHz  
WDW EM  
SSB 0  
LB 1.00 Hz  
GB 0  
PC 1.40

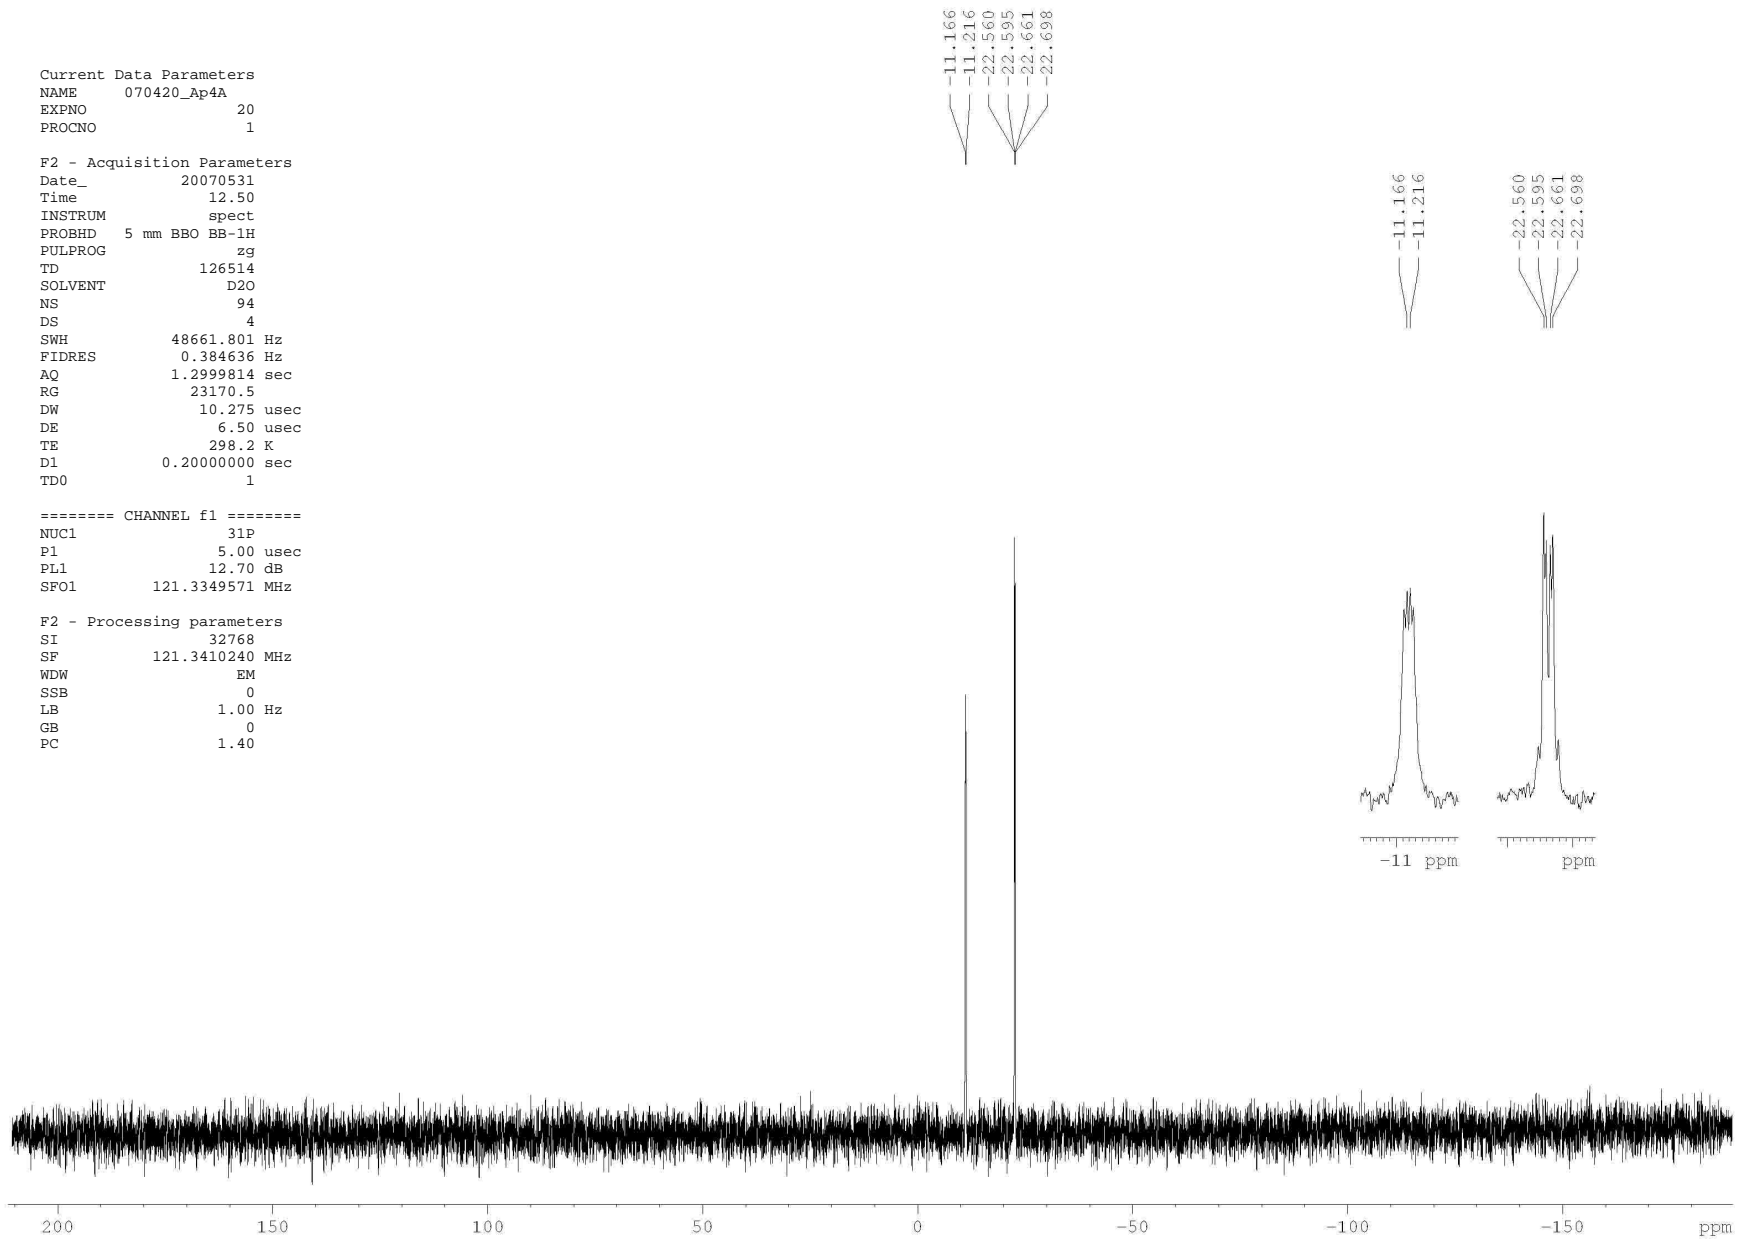

# LCMS of Ap<sub>4</sub>A, 3a

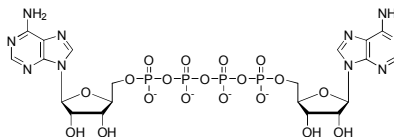

070420\_AP4A\_TPcol\_r1f6

5/4/2007 9:15:19 AM

RT: 0.00 - 16.00 SM: 3B

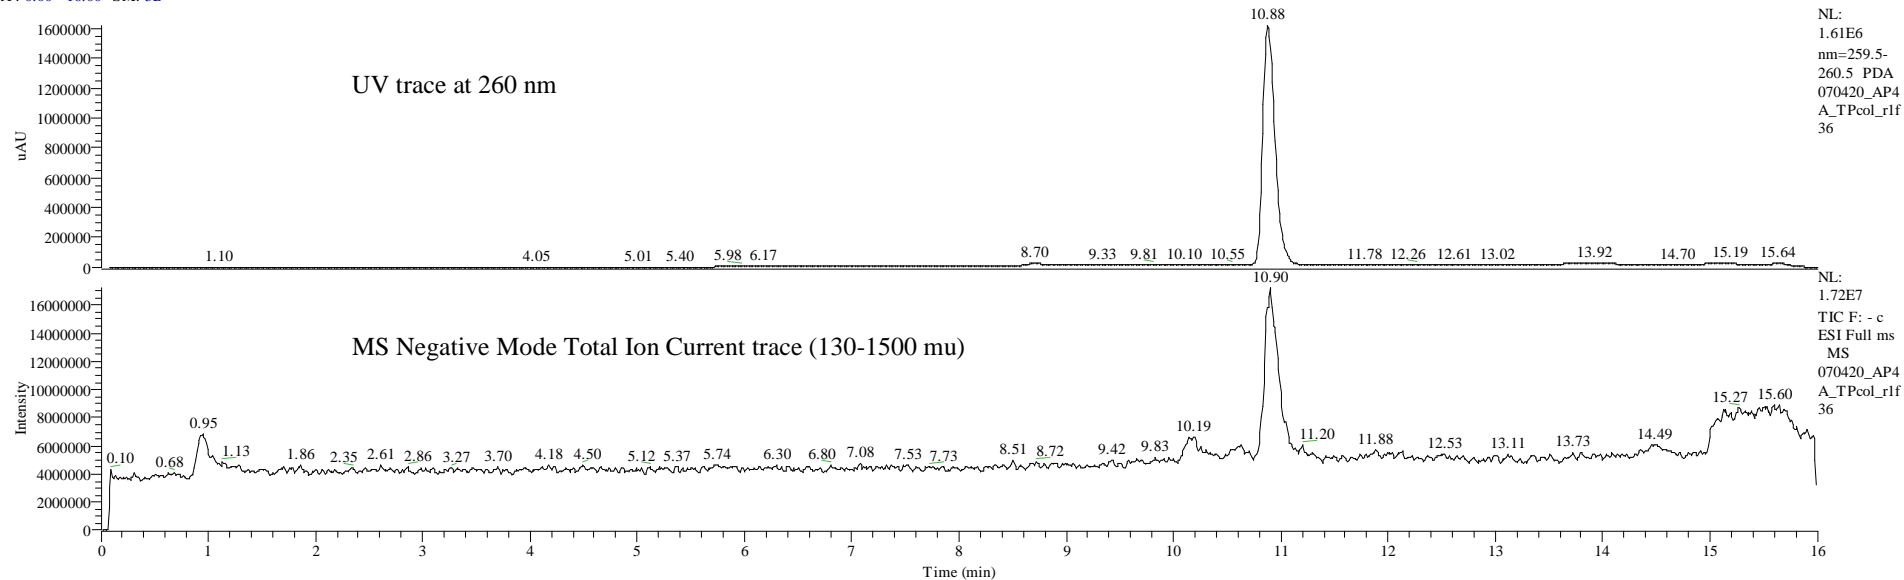

070420\_AP4A\_TPcol\_r1f6 #1010-1028 RT: 10.84-11.00 AV: 19 NL: 3.31E6

F: - c ESI Full ms

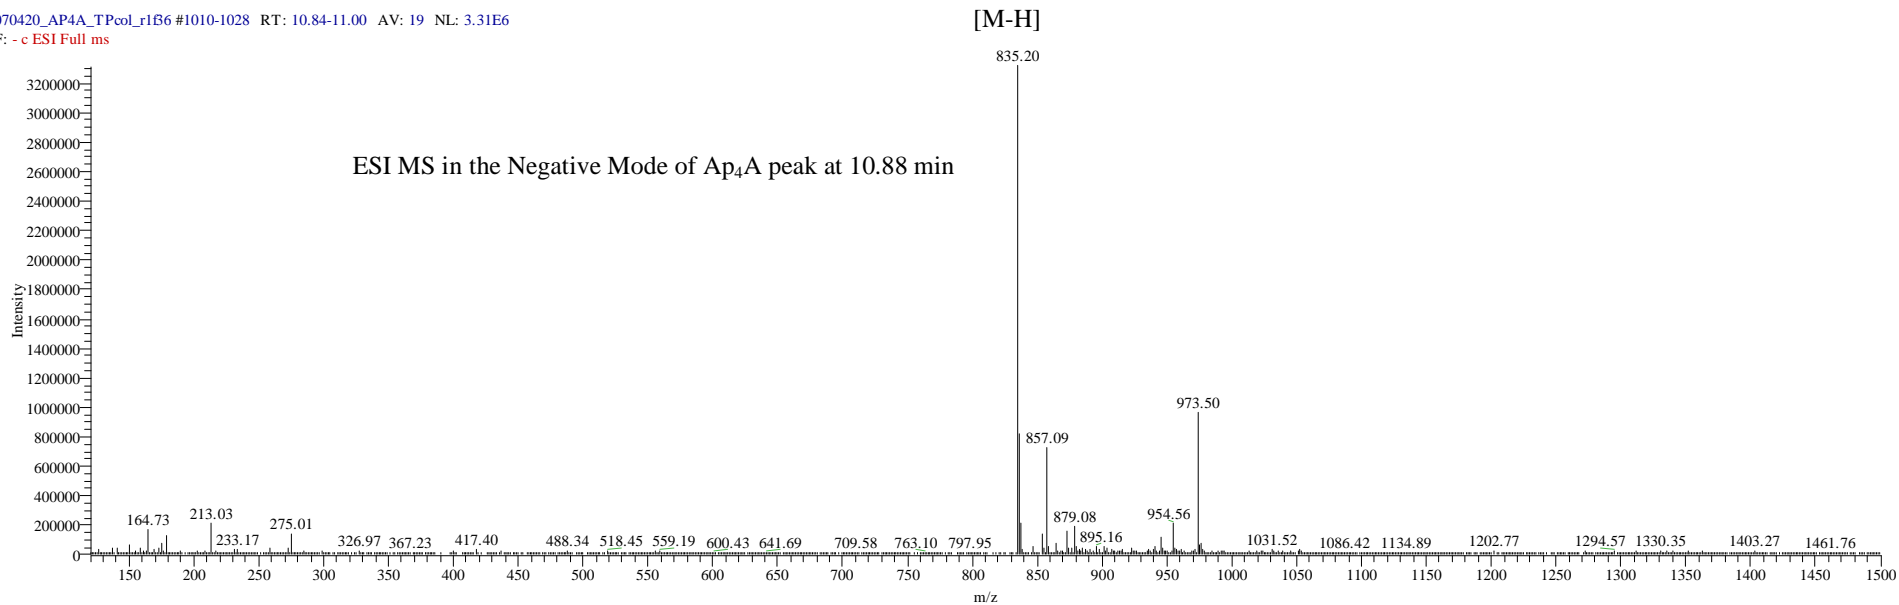

1H NMR spectrum of Up<sub>4</sub>U sodium salt, **3f** in D<sub>2</sub>O

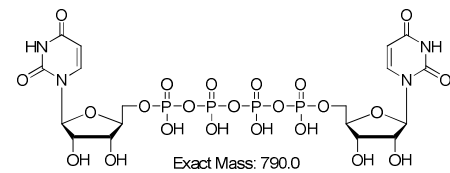

1H NMR of UP4U Na salt, 050223 and 050217 in d2o

```

Current Data Parameters
NAME      050227_UP4U_Na
EXPNO    10
PROCNO    1

F2 - Acquisition Parameters
Date_     20050311
Time      10.05
INSTRUM   spect
PROBHD    5 mm Multinuc
PULPROG   zg30
TD        65536
SOLVENT   D2O
NS        16
DS        2
SWH       6172.839 Hz
FIDRES    0.094190 Hz
AQ        0.3084660 sec
RG        4
DM        81.000 usec
DE        5.00 usec
TE        300.0 K
D1        1.0000000 sec

===== CHANNEL f1 =====
NUC1      1H
P1        14.00 usec
PL1       0.00 dB
SFO1      299.8818219 MHz

F2 - Processing parameters
SI        32768
SF        299.8800000 MHz
WDW       EM
SSB       0
LB        0.30 Hz
GB        0
PC        1.00

4D NMR plot parameters
CX        26.50 cm
F1P       9.063 ppm
F1        2717.81 Hz
F2P       0.633 ppm
F2        249.81 Hz
PPMCM    0.31055 ppm/cm
HZCM     93.12825 Hz/cm
    
```

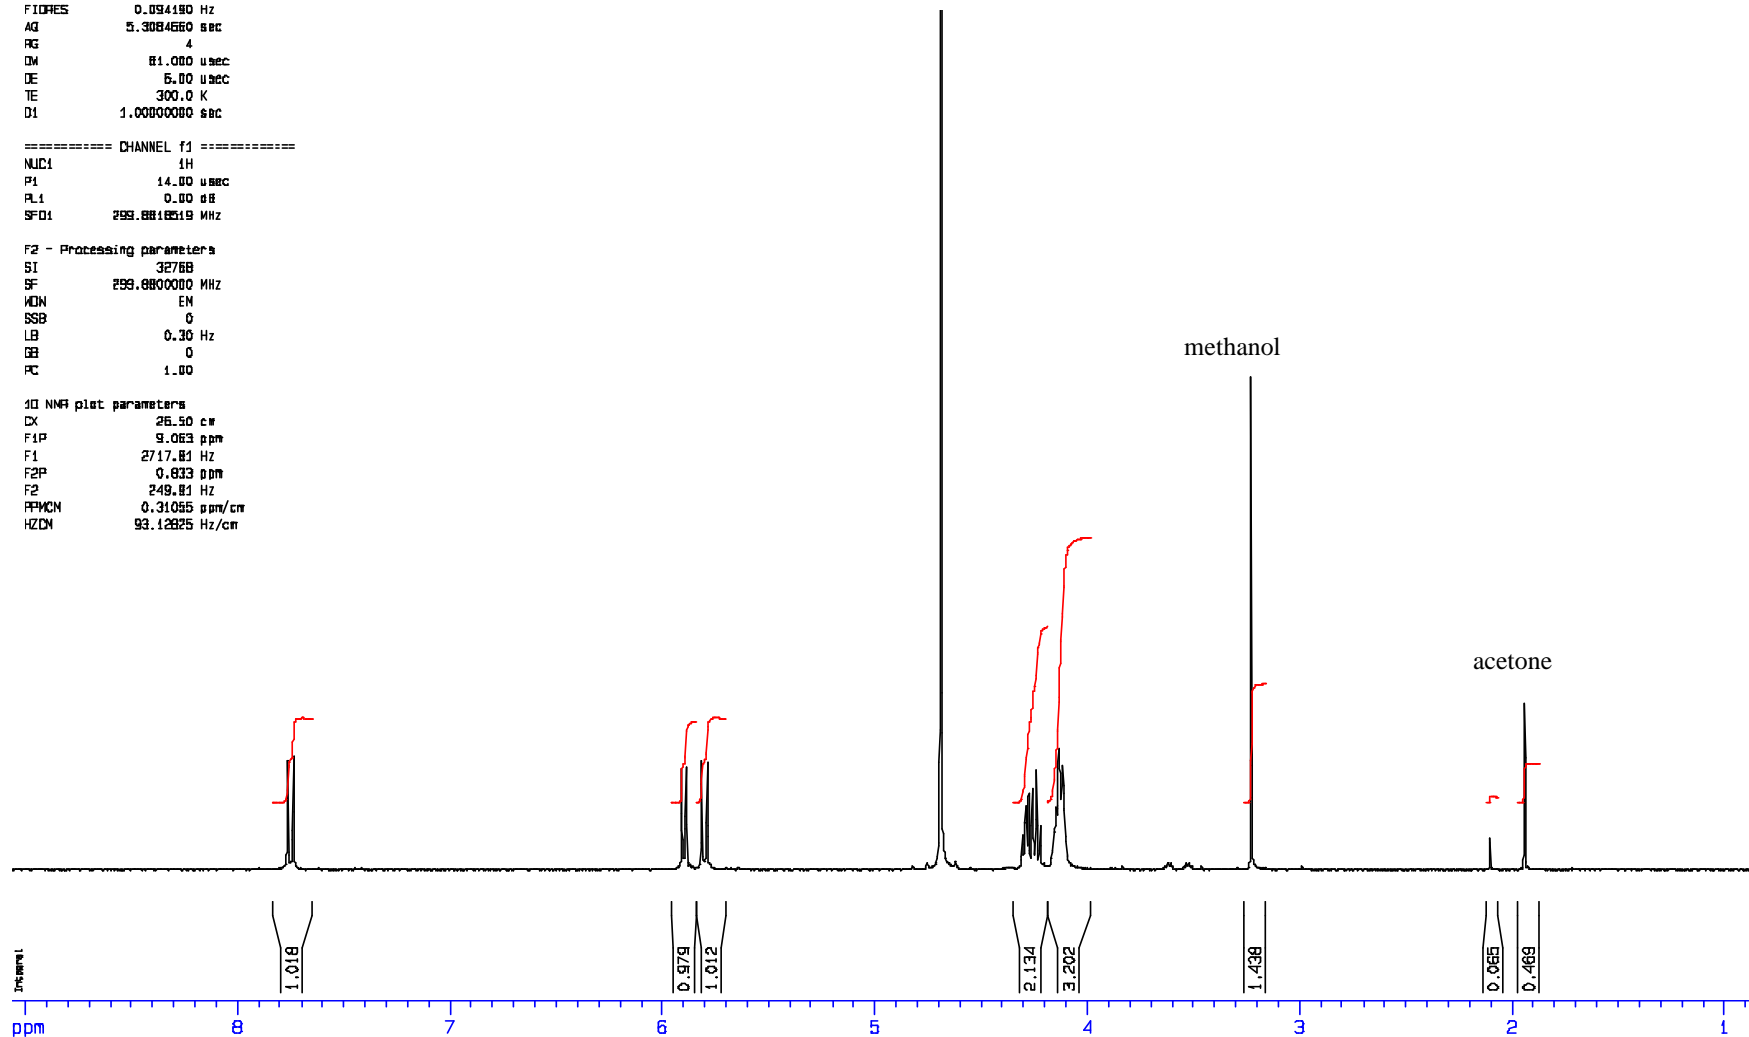

<sup>31</sup>P (proton decoupled) NMR spectrum of Up<sub>4</sub>U sodium salt, **3f** in D<sub>2</sub>O

Current Data Parameters  
 NAME 050227\_LP4U\_No  
 EXPNO 40  
 PROCNO 1

F2 - Acquisition Parameters  
 Date\_ 20050311  
 Time 10.31  
 INSTRUM spect  
 PROBHD 5 mm Multinuc  
 PULPROG zgpg30  
 TD 145980  
 SOLVENT d2o  
 NS 88  
 DS 32  
 SSB 48661.801 Hz  
 FIDRES 0.333246 Hz  
 AQ 1.4898945 sec  
 RG 28643.0  
 DW 10.275 usec  
 DE 5.00 usec  
 TE 300.0 K  
 D1 0.10000000 sec  
 d11 0.03000000 sec  
 d12 0.00000000 sec

----- CHANNEL f1 -----  
 NUC1 <sup>31</sup>P  
 P1 10.00 usec  
 PL1 3.00 dB  
 SFO1 121.3874255 MHz

----- CHANNEL f2 -----  
 CHARGE2 m31z128  
 NUC2 <sup>1</sup>H  
 PPRG2 88.00 usec  
 PL2 0.00 dB  
 PL12 17.00 dB  
 PL13 17.00 dB  
 SFO2 288.8811993 MHz

F2 - Processing parameters  
 SI 32768  
 SF 121.3834930 MHz  
 MDW EM  
 SSB 0  
 LB 1.00 Hz  
 GB 0  
 PC 1.40

1D NMR plot parameters  
 CX 25.00 cm  
 F1P 106.431 ppm  
 F1 18261.40 Hz  
 F2P -250.429 ppm  
 F2 -30400.41 Hz  
 PRNOM 15.41769 ppm/cm  
 HZOM 1871.6075 Hz/cm

<sup>31</sup>P {1H dec.} of UP4U Na salt, 050223 and 050217 in d2o

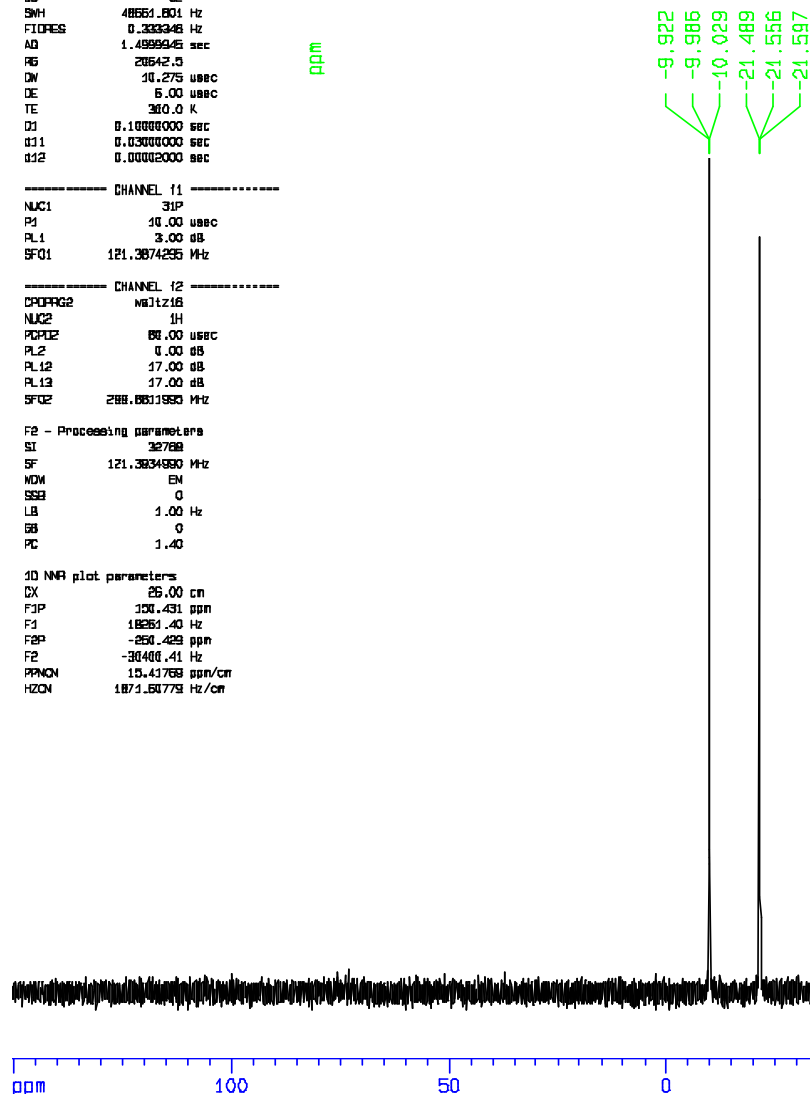

Current Data Parameters  
 NAME 050217\_LP4U\_No  
 EXPNO 40  
 PROCNO 1

F2 - Acquisition Parameters  
 Date\_ 20050311  
 Time 10.28  
 INSTRUM spect  
 PROBHD 5 mm Multinuc  
 PULPROG zgpg30  
 TD 145980  
 SOLVENT d2o  
 NS 88  
 DS 32  
 SSB 48661.801 Hz  
 FIDRES 0.333246 Hz  
 AQ 1.4898945 sec  
 RG 28643.0  
 DW 10.275 usec  
 DE 5.00 usec  
 TE 300.0 K  
 D1 0.10000000 sec  
 d11 0.03000000 sec  
 d12 0.00000000 sec

----- CHANNEL f1 -----  
 NUC1 <sup>31</sup>P  
 P1 10.00 usec  
 PL1 3.00 dB  
 SFO1 121.3874255 MHz

----- CHANNEL f2 -----  
 CHARGE2 m31z128  
 NUC2 <sup>1</sup>H  
 PPRG2 88.00 usec  
 PL2 0.00 dB  
 PL12 17.00 dB  
 PL13 17.00 dB  
 SFO2 288.8811993 MHz

F2 - Processing parameters  
 SI 32768  
 SF 121.3834930 MHz  
 MDW EM  
 SSB 0  
 LB 1.00 Hz  
 GB 0  
 PC 1.40

1D NMR plot parameters  
 CX 25.00 cm  
 F1P 106.431 ppm  
 F1 18261.40 Hz  
 F2P -250.429 ppm  
 F2 -30400.41 Hz  
 PRNOM 15.41769 ppm/cm  
 HZOM 1871.6075 Hz/cm

<sup>31</sup>P {1H dec.} of UP4U Na salt, 050223 and 050217 in d2o

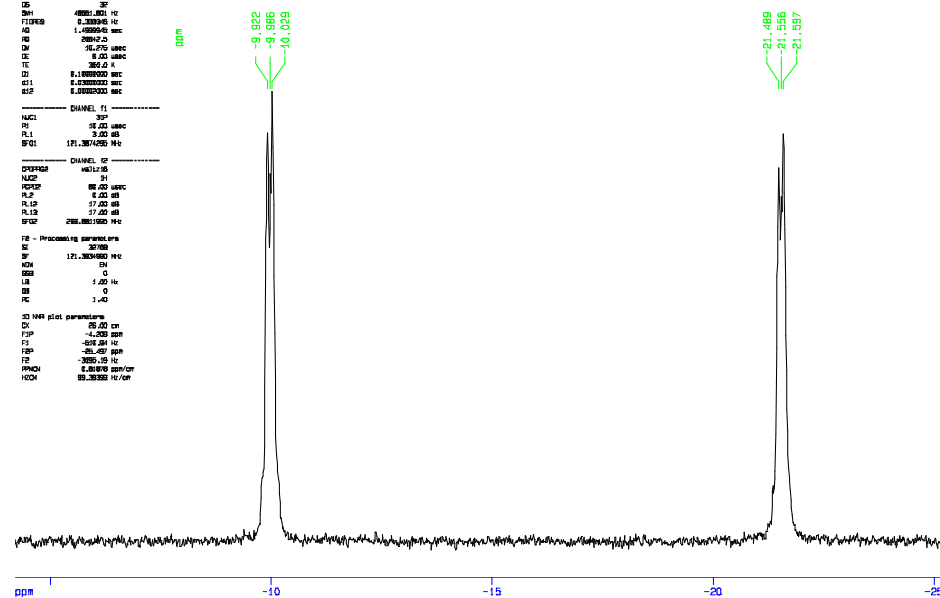

<sup>31</sup>P (proton coupled) NMR spectrum of Up<sub>4</sub>U sodium salt, **3f** in D<sub>2</sub>O

Current Data Parameters  
 NAME 050227\_UP4U\_Na  
 EXPNO 20  
 PROCNO 1

F2 - Acquisition Parameters  
 Date\_ 20090311  
 Time 10.14  
 INSTRUM spect  
 PROBR0 5 mm Nu1Hinc  
 PULPROG zg30  
 TD 326514  
 SOLVENT d2o  
 NS 53  
 DS 4  
 SWH 40669.801 Hz  
 FIDRES 0.384638 Hz  
 AQ 1.2999814 sec  
 RG 2860  
 DW 10.275 usec  
 DE 6.00 usec  
 TE 300.0 K  
 D1 0.10000000 sec

----- CHANNEL f1 -----  
 NUC1 31P  
 P1 10.00 usec  
 PL1 3.00 dB  
 SFO1 124.3874256 MHz

F2 - Processing parameters  
 SI 32768  
 SF 124.3834590 MHz  
 WDW EM  
 SSB 0  
 LB 1.00 Hz  
 BB 0  
 PC 1.40

3D NMR plot parameters  
 CX 25.00 cm  
 FJP 160.431 ppm  
 FJ 18269.40 Hz  
 FZP -200.429 ppm  
 FZ -30400.41 Hz  
 PRMCH 16.41769 ppm/cm  
 HZCN 1871.68779 Hz/cm

<sup>31</sup>P (proton coupled) NMR of UP4U Na salt, 050223 and 050217 in d2o

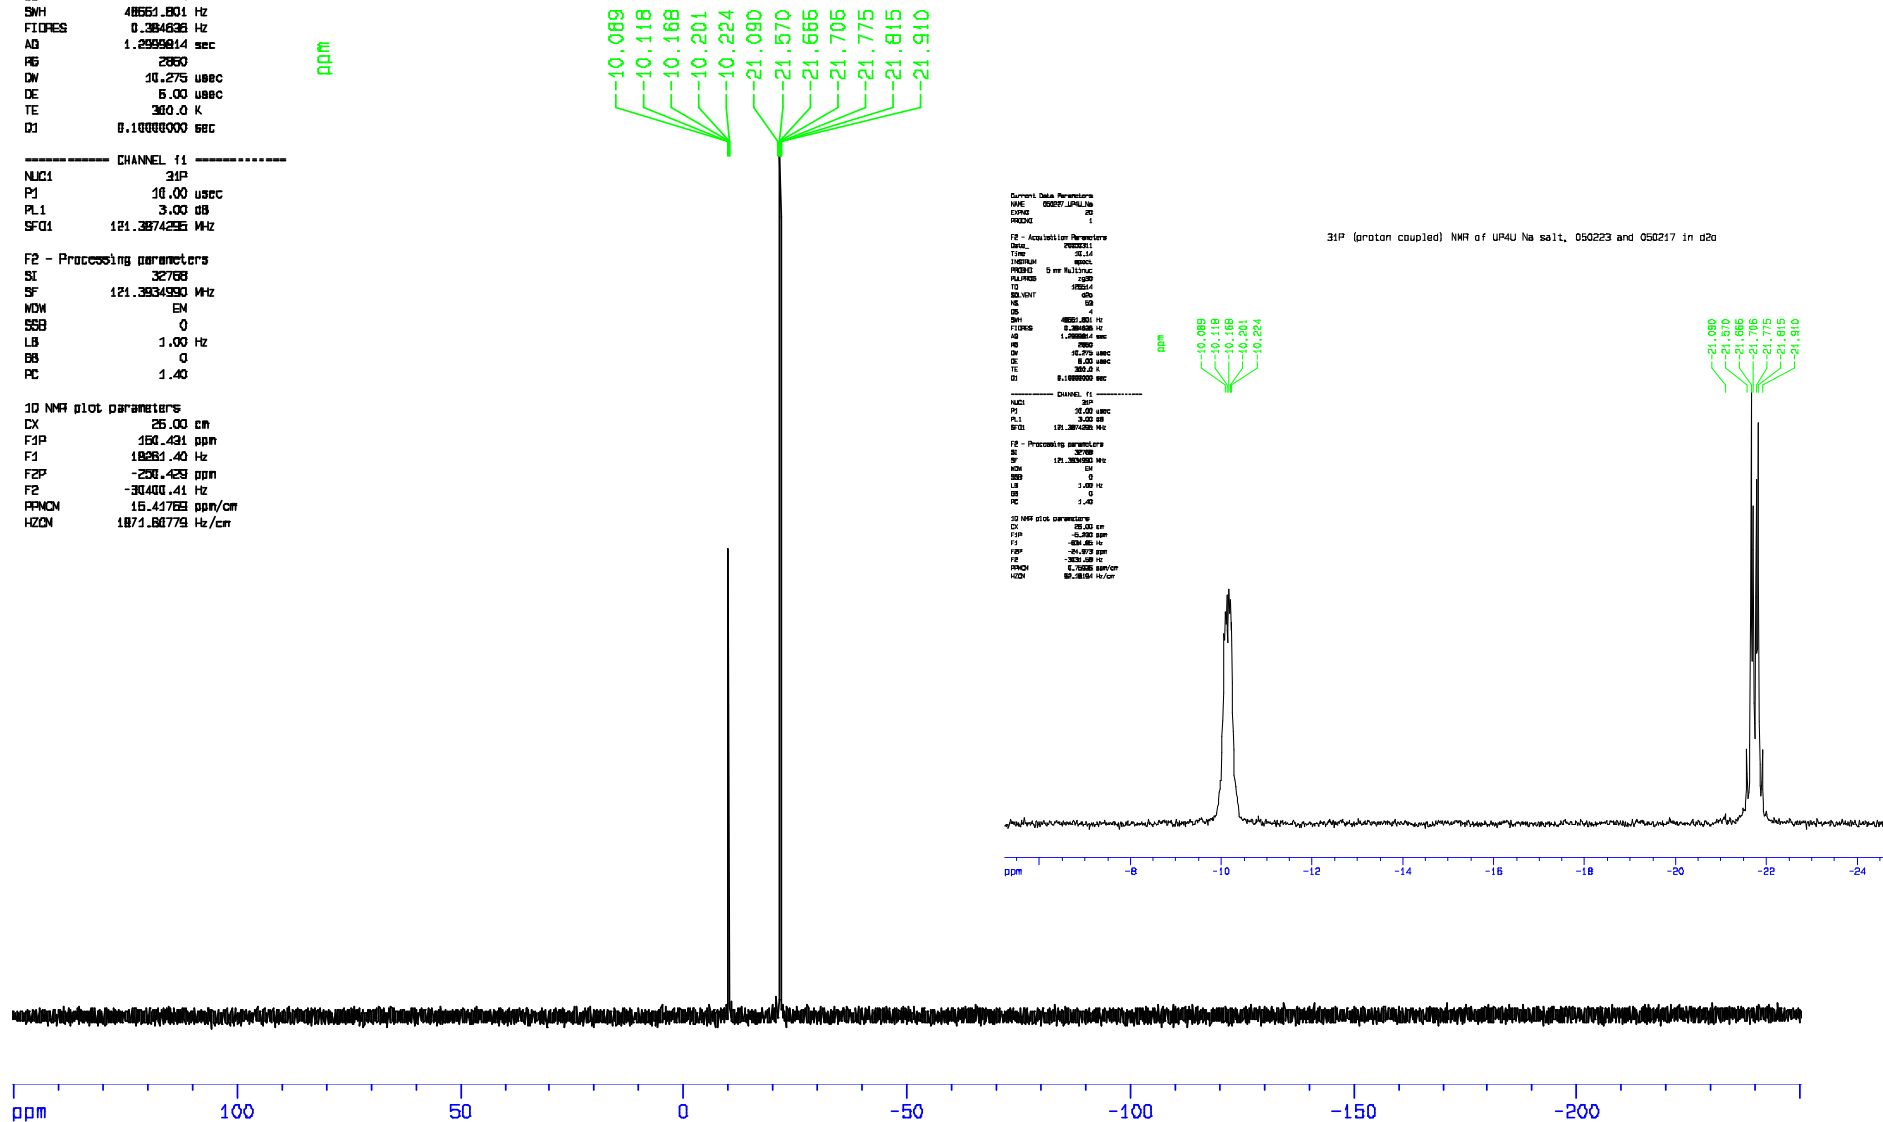

Current Data Parameters  
 NAME 050227\_UP4U\_Na  
 EXPNO 20  
 PROCNO 1

F2 - Acquisition Parameters  
 Date\_ 20090311  
 Time 10.14  
 INSTRUM spect  
 PROBR0 5 mm Nu1Hinc  
 PULPROG zg30  
 TD 326514  
 SOLVENT d2o  
 NS 53  
 DS 4  
 SWH 40669.801 Hz  
 FIDRES 0.384638 Hz  
 AQ 1.2999814 sec  
 RG 2860  
 DW 10.275 usec  
 DE 6.00 usec  
 TE 300.0 K  
 D1 0.10000000 sec

----- CHANNEL f1 -----  
 NUC1 31P  
 P1 10.00 usec  
 PL1 3.00 dB  
 SFO1 124.3874256 MHz

F2 - Processing parameters  
 SI 32768  
 SF 124.3834590 MHz  
 WDW EM  
 SSB 0  
 LB 1.00 Hz  
 BB 0  
 PC 1.40

3D NMR plot parameters  
 CX 25.00 cm  
 FJP 160.431 ppm  
 FJ 18269.40 Hz  
 FZP -200.429 ppm  
 FZ -30400.41 Hz  
 PRMCH 16.41769 ppm/cm  
 HZCN 1871.68779 Hz/cm

<sup>31</sup>P (proton coupled) NMR of UP4U Na salt, 050223 and 050217 in d2o

# LCMS of Up<sub>4</sub>U, 3f

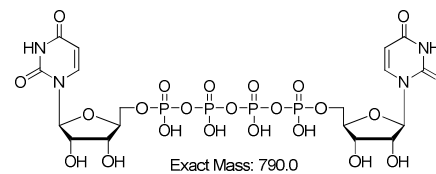

Up4U\_NaSalt\_29Apr08\_080429155436

4/29/2008 3:54:36 PM

RT: 0.00 - 15.00 SM: 3B

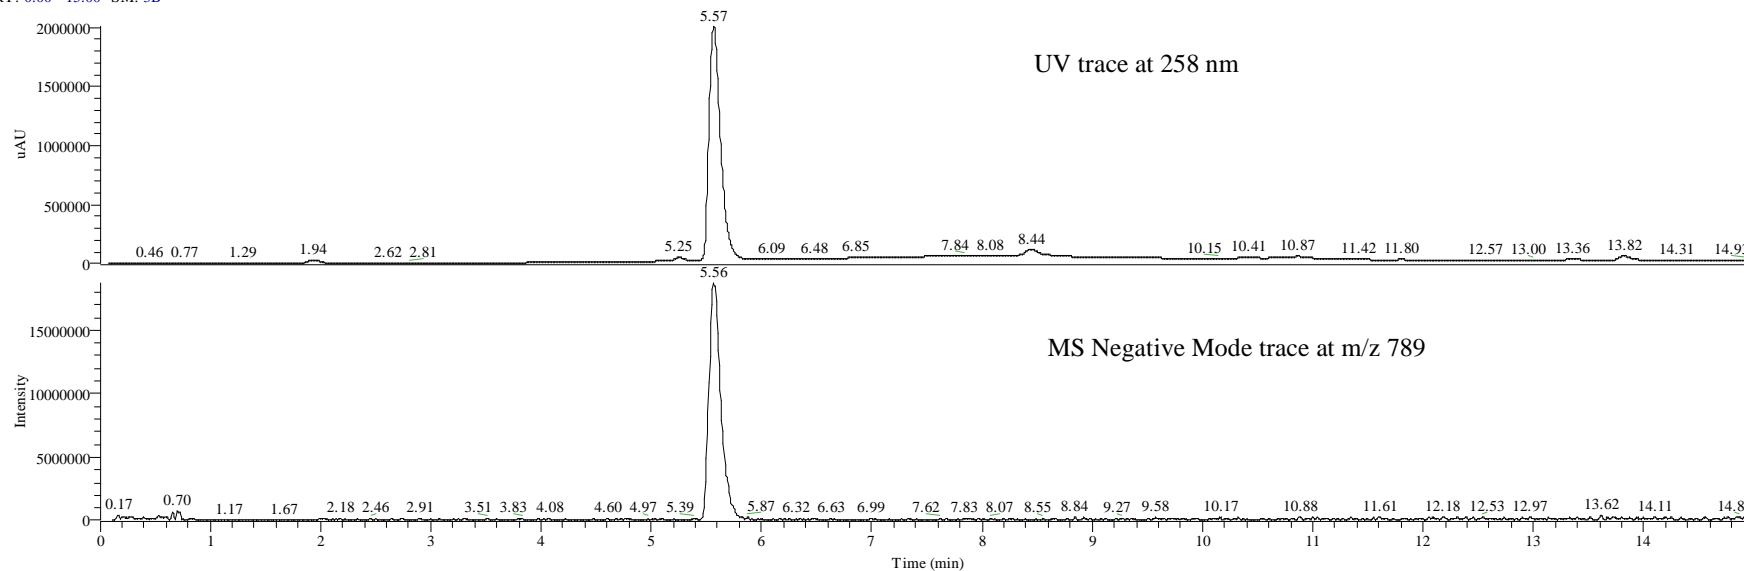

NL: 2.00E6  
nm=256.2-258.8 PDA  
Up4U\_NaSalt\_29Apr08\_080429155436

NL: 1.86E7  
m/z= 787.62-790.59 F:  
- c ESI Full ms  
[250.00-1600.00] MS  
Up4U\_NaSalt\_29Apr08\_080429155436

Up4U\_NaSalt\_29Apr08\_080429155436 #674-691 RT: 5.51-5.63 AV: 18 SB: 39 5.36-5.48, 5.67-5.84 NL: 1.12E7  
F: - c ESI Full ms [250.00-1600.00]

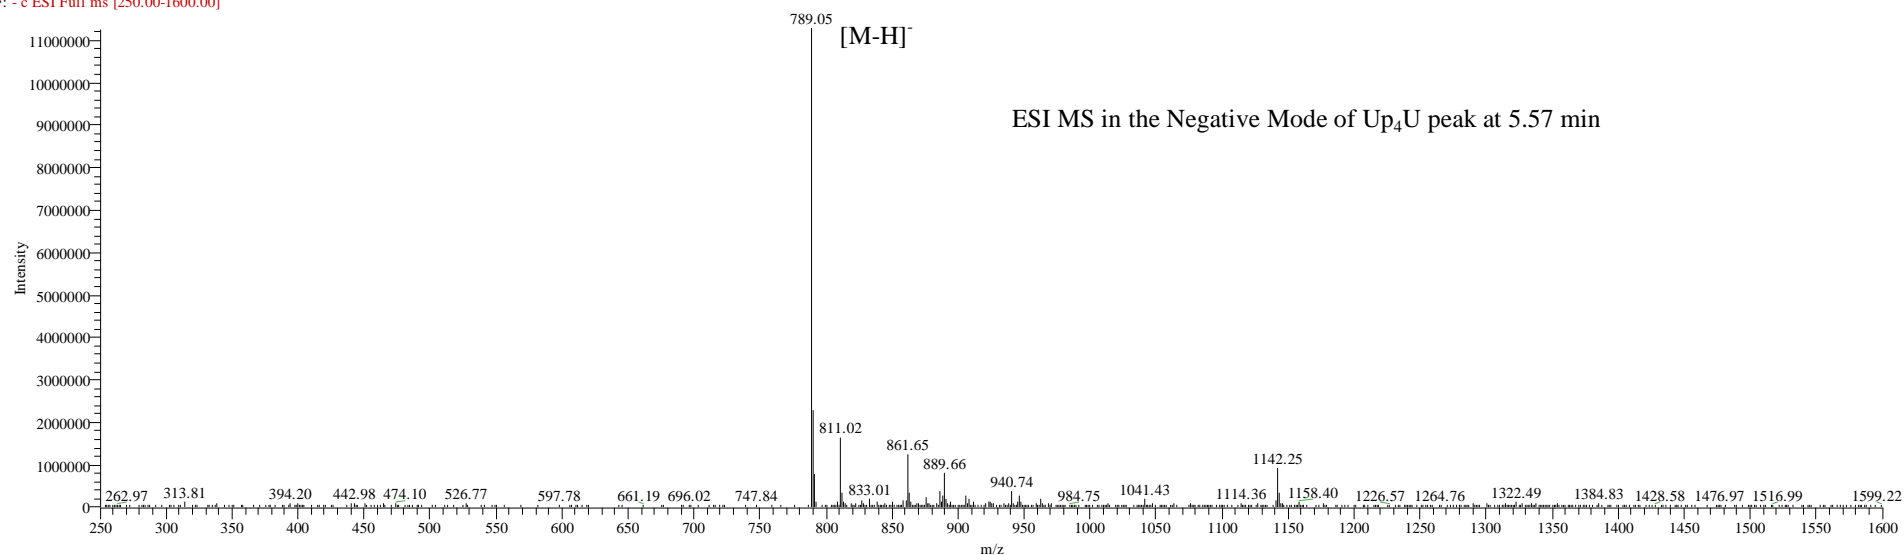

Simulated fitting of an AA'XX' spin system to the experimental  $^{31}\text{P}$  NMR spectra of Ap<sub>4</sub>A and Up<sub>4</sub>U (**3a** and **3f**, resp.):

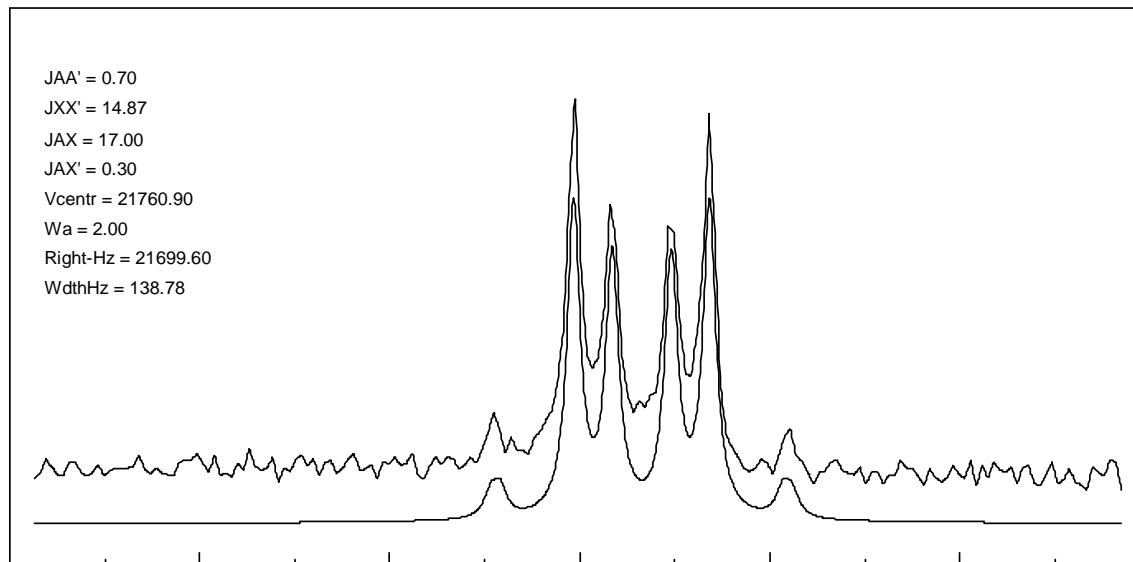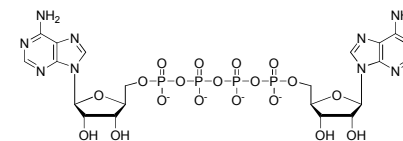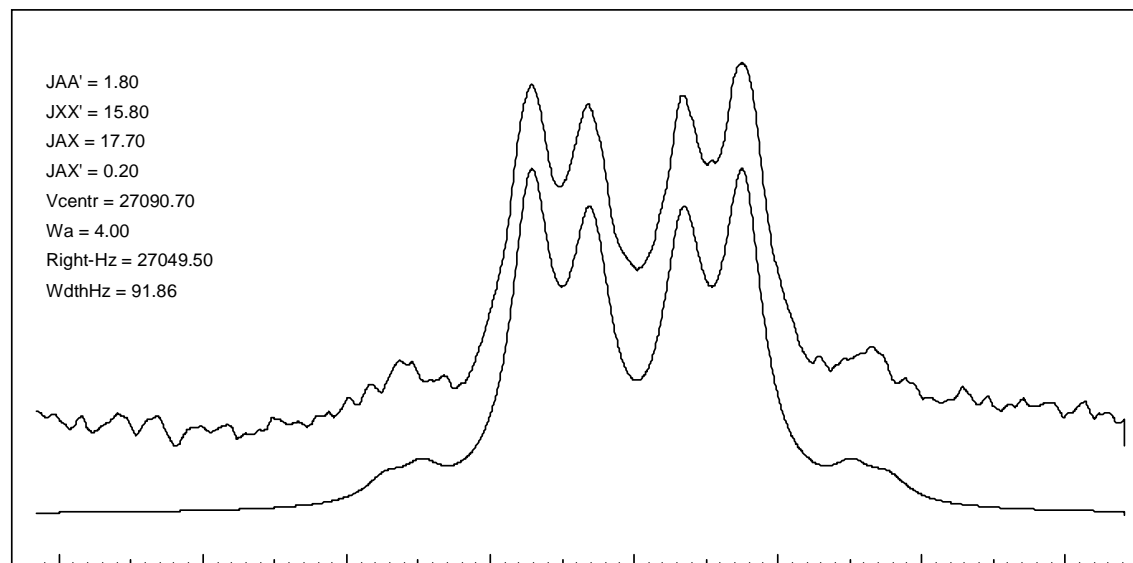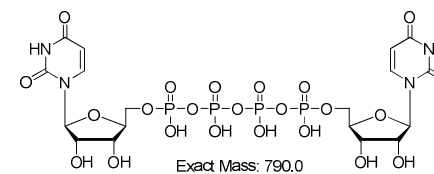



$^1\text{H}$  NMR of APPHCIPPA sodium salt, **3c** in  $\text{D}_2\text{O}$ :

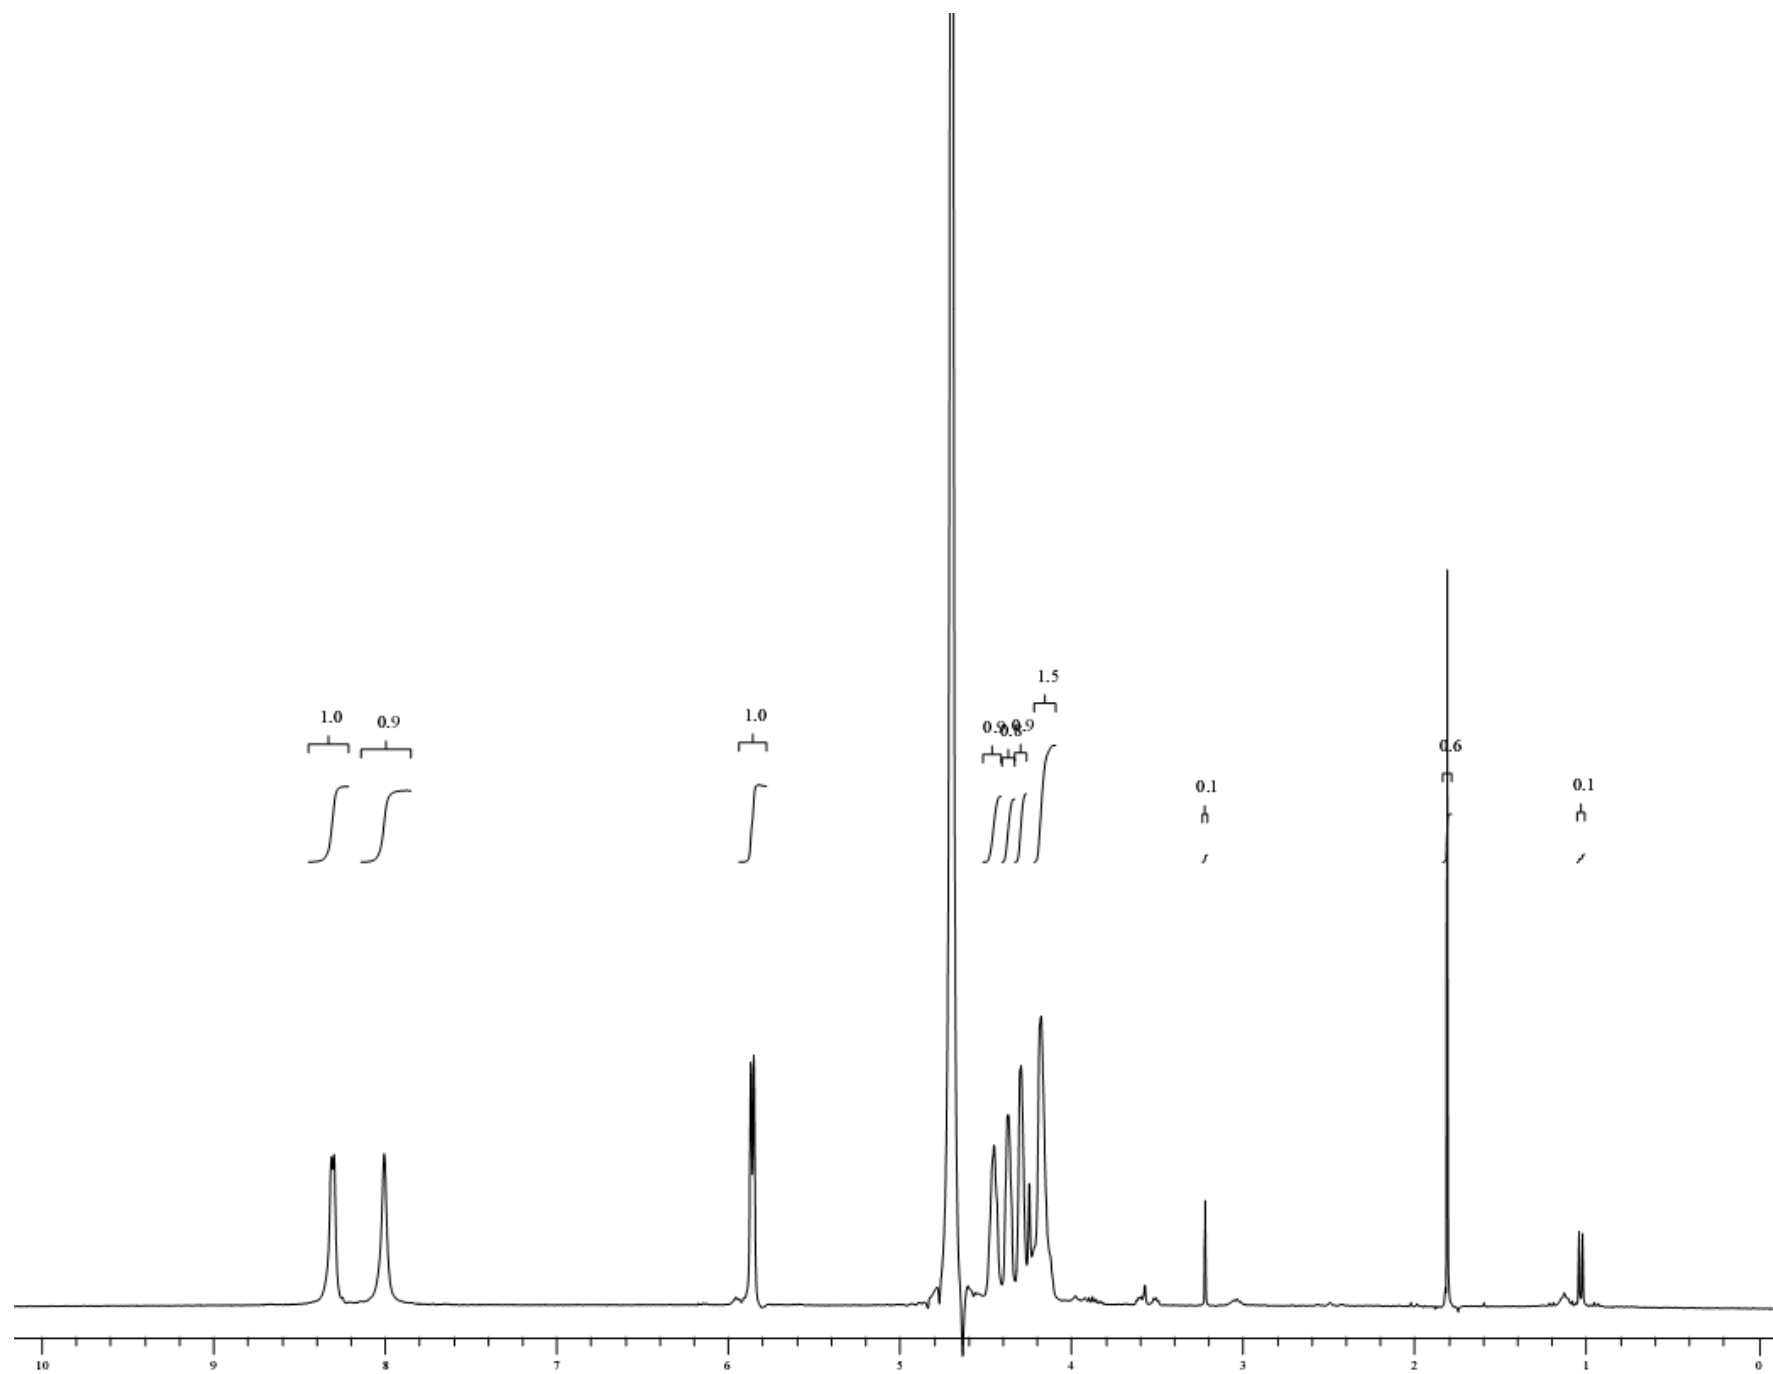

$^{31}\text{P}$  NMR (proton decoupled) of APPHCIPPA sodium salt, **3c** in  $\text{D}_2\text{O}$ :

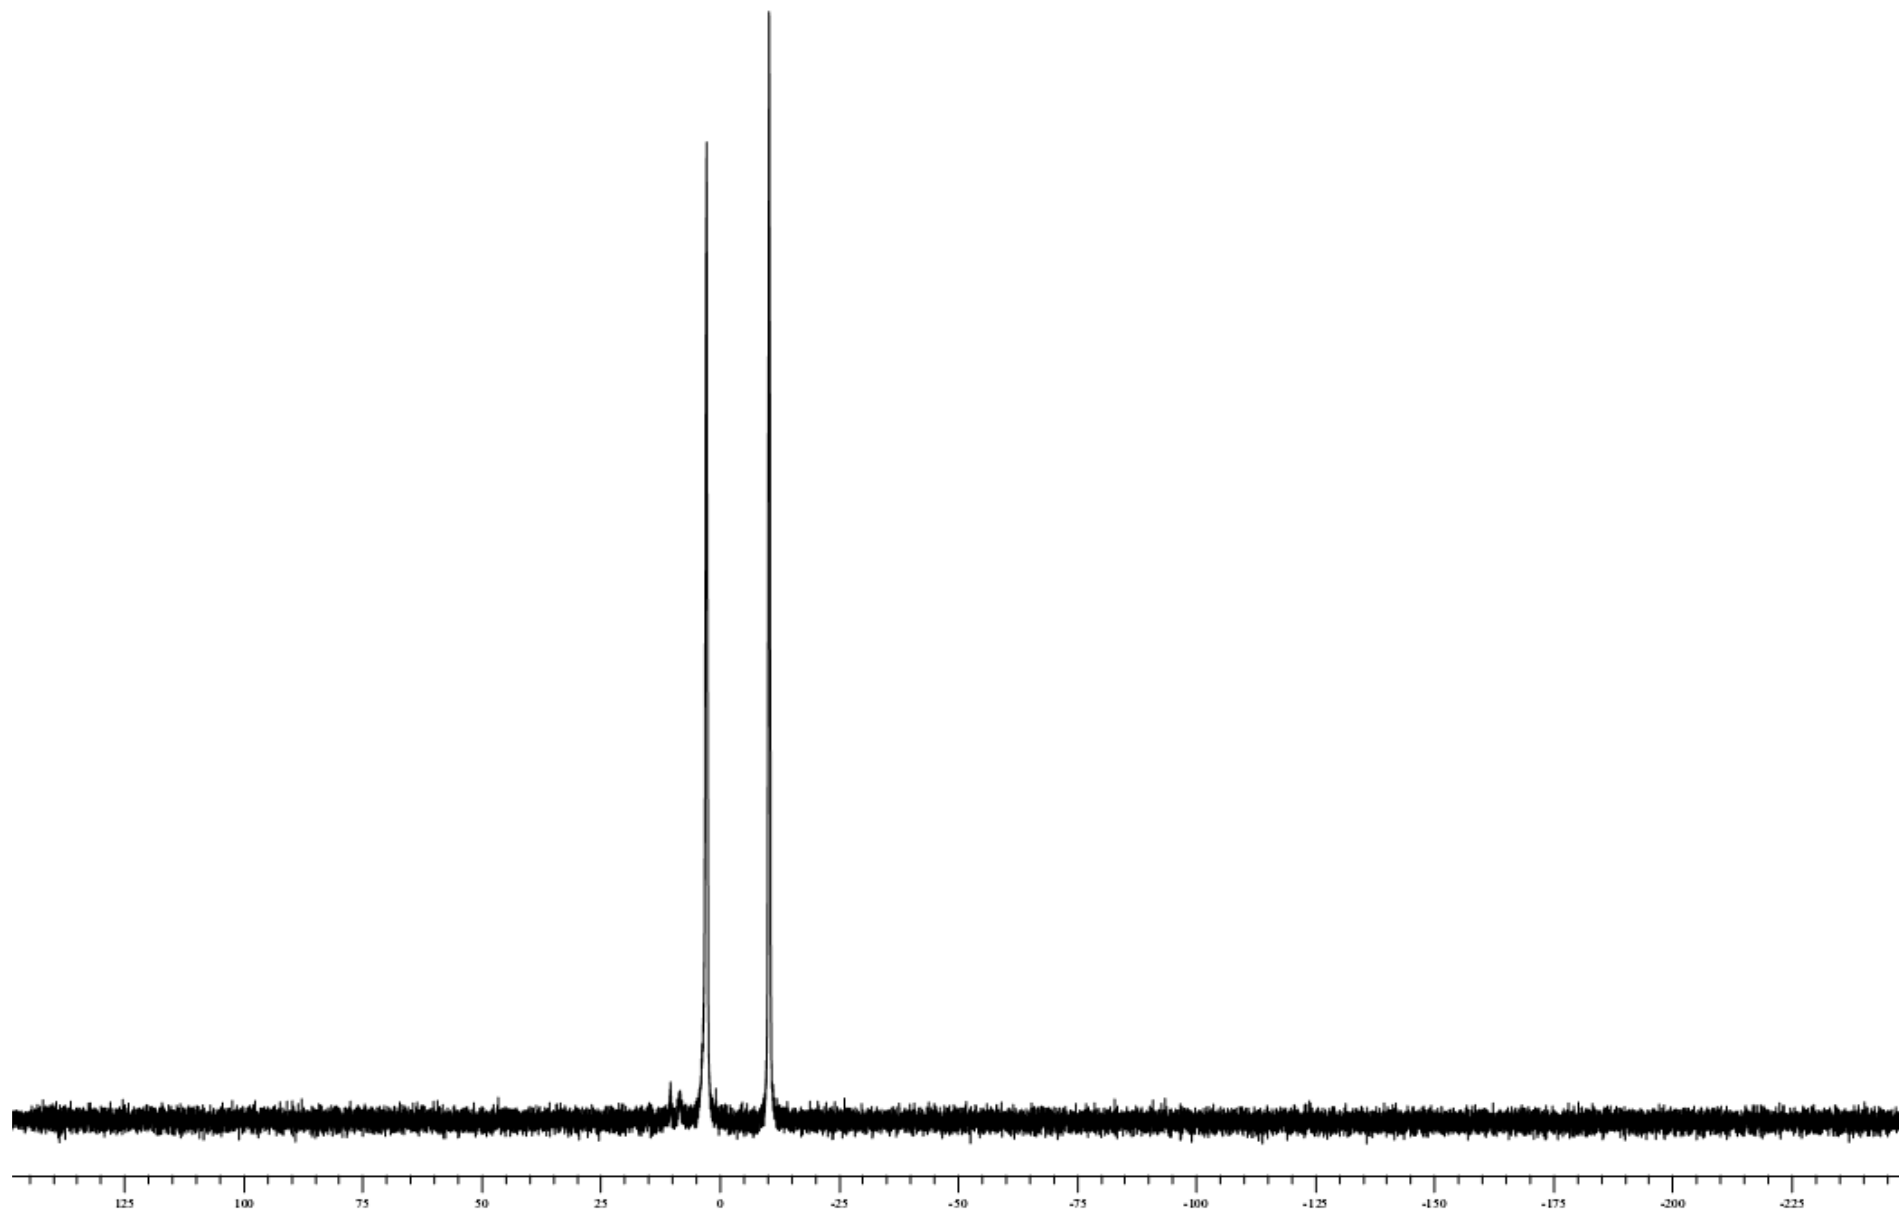

$^{31}\text{P}$  NMR (proton coupled) of APPHCIPPA sodium salt, **3c** in  $\text{D}_2\text{O}$ :

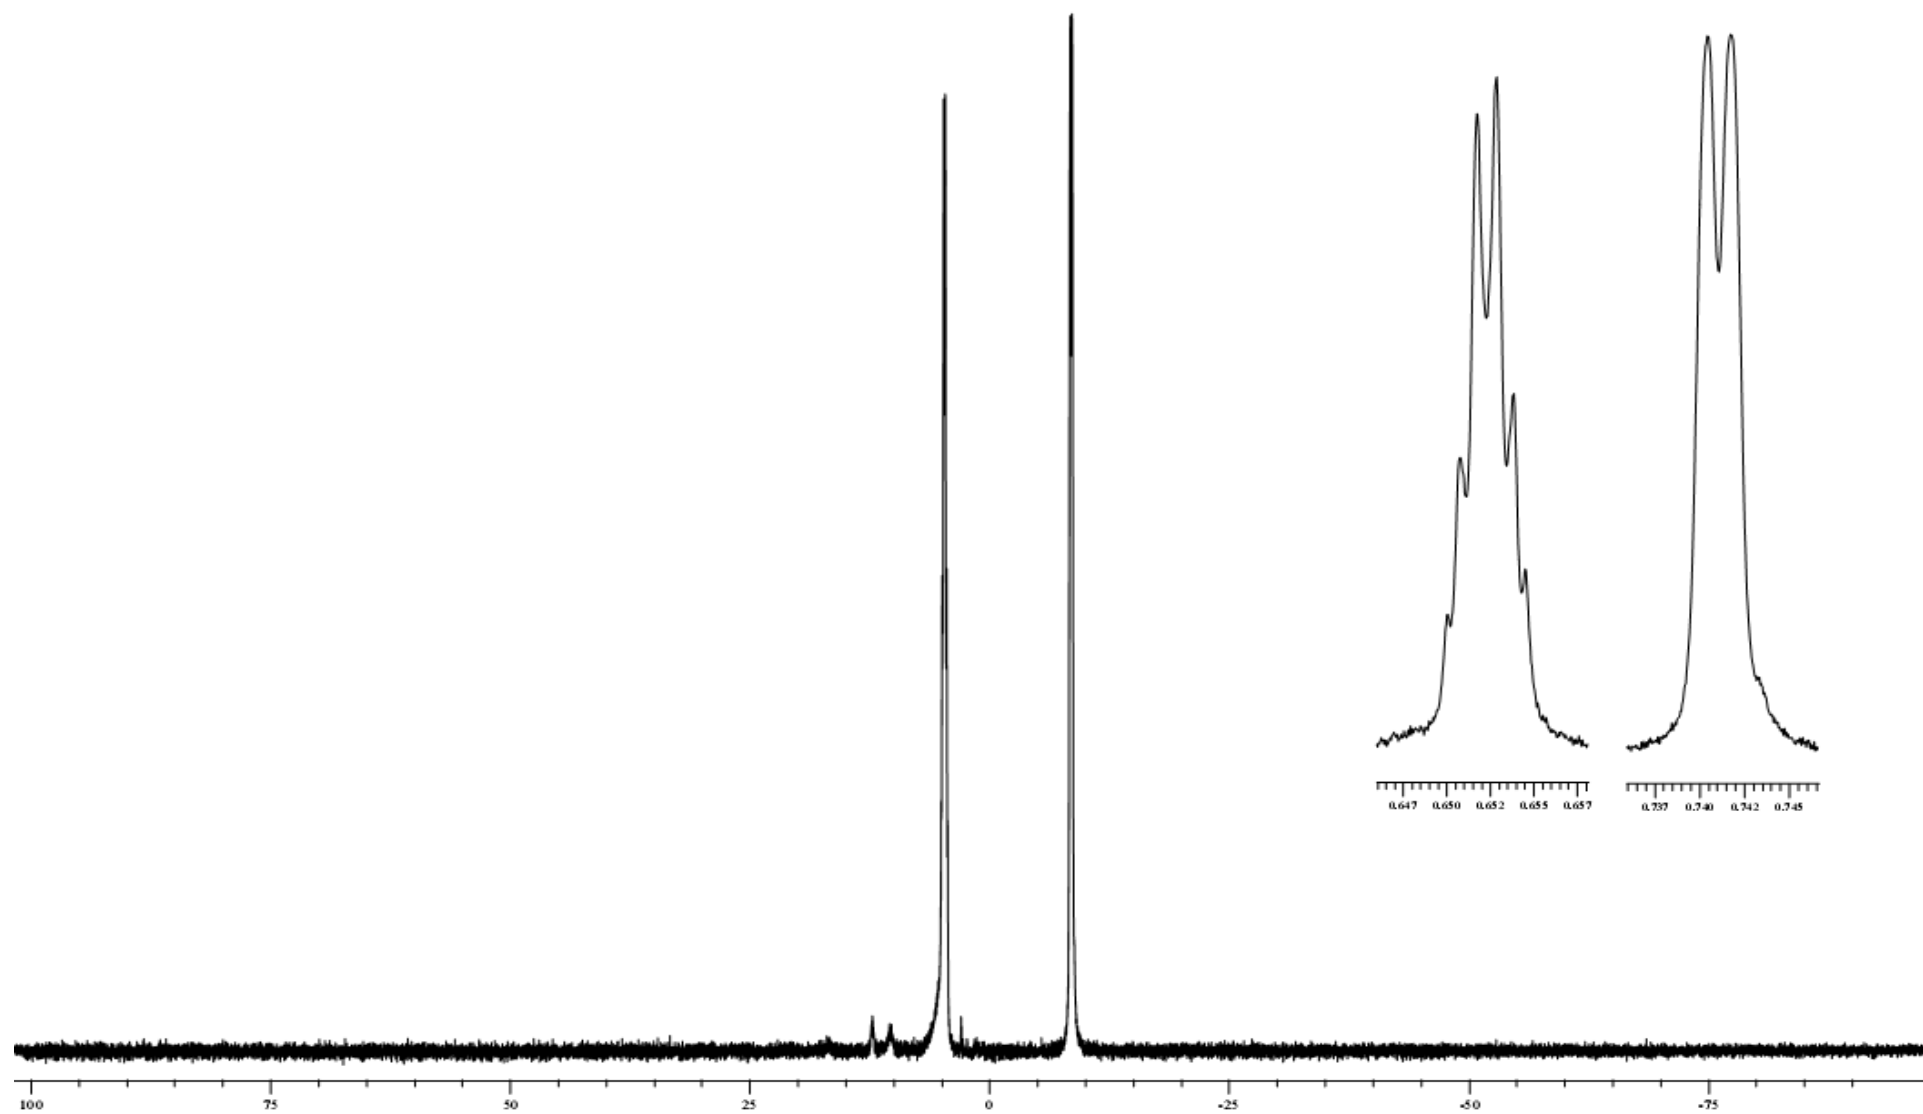

# LCMS analysis of APPCHCIPPA sodium salt, **3c**:

a) UV (top), MS Pos. mode TIC (middle), and MS Neg. mode TIC (bottom) chromatograms:

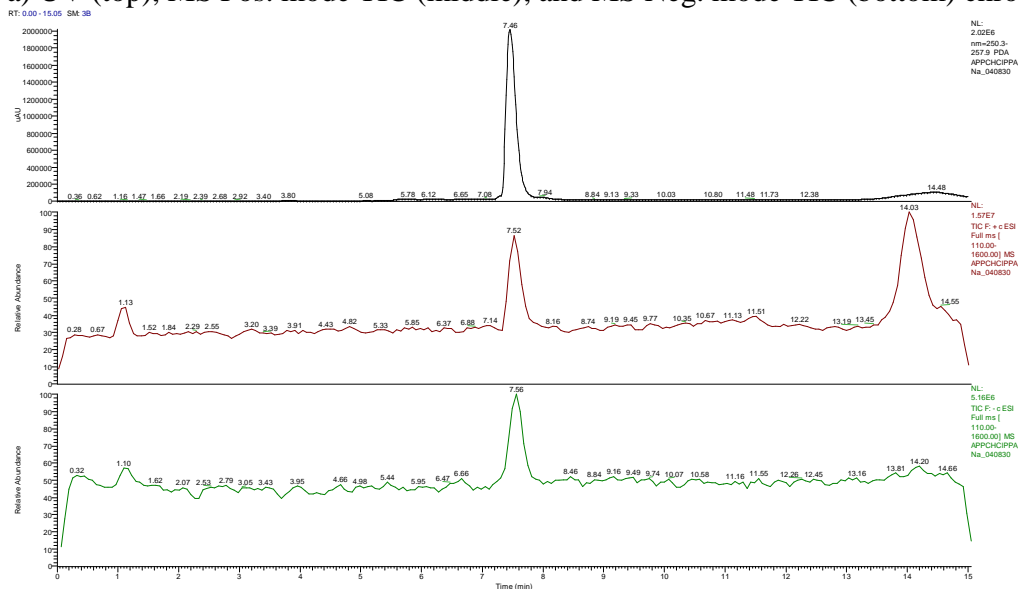

b) Positive mode MS of APPCHCIPPA peak at 7.46 min

APPCHCIPPA\_Na\_040830 #231-235 RT: 7.46-7.58 AV: 3 SB: 7.718-7.37, 7.71-7.94 NL: 1.88E6  
T: + c ESI Full ms [ 110.00-1600.00]

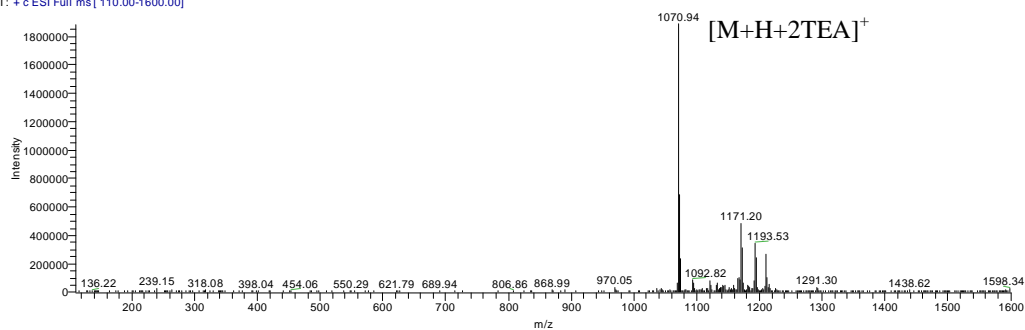

c) Negative mode MS of APPCHCIPPA peak at 7.46 min

APPCHCIPPA\_Na\_040830 #231-236 RT: 7.50-7.62 AV: 3 SB: 7.720-7.39, 7.71-7.94 NL: 1.04E6  
T: - c ESI Full ms [ 110.00-1600.00]

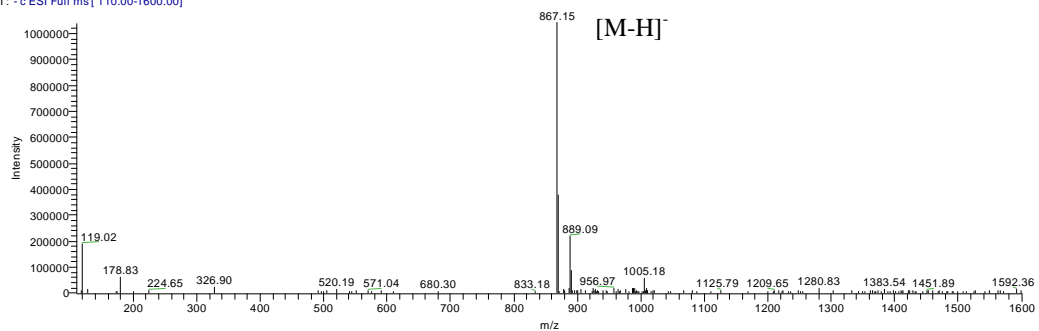

# <sup>1</sup>H NMR of APPCHFPPA, **3e** as the tetrabutylammonium salt in D<sub>2</sub>O:

Current Data Parameters  
NAME 040910TBA1\_APPCHFPPA\_TBA  
EXPNO 20  
PROCNO 1

F2 - Acquisition Parameters  
Date\_ 20041018  
Time 14.17  
INSTRUM spect  
PROBHD 5 mm Multinuc  
PULPROG zg30  
TD 74072  
SOLVENT D2O  
NS 8  
DS 2  
SWH 6172.839 Hz  
FIDRES 0.083336 Hz  
AQ 5.9998822 sec  
RG 40.3  
DM 81.000 usec  
DE 5.00 usec  
TE 300.0 K  
D1 1.0000000 sec

<sup>1</sup>H NMR of APPCHFPPA Bu<sub>3</sub>N salt batch IY040910TBA1 in D<sub>2</sub>O

----- CHANNEL f1 -----  
NUC1 1H  
P1 14.00 usec  
PL1 0.00 dB  
SFO1 299.9418523 Mhz

F2 - Processing parameters  
SI 32768  
SF 299.9400000 Mhz  
WDW EM  
SSB 0  
LB 0.30 Hz  
GB 0  
PC 1.00

1D NMR plot parameters  
CX 25.50 cm  
F1P 15.466 ppm  
F1 4938.67 Hz  
F2P -4.115 ppm  
F2 -1234.17 Hz  
PPMCM 0.77661 ppm/cm  
HZCM 232.93735 Hz/cm

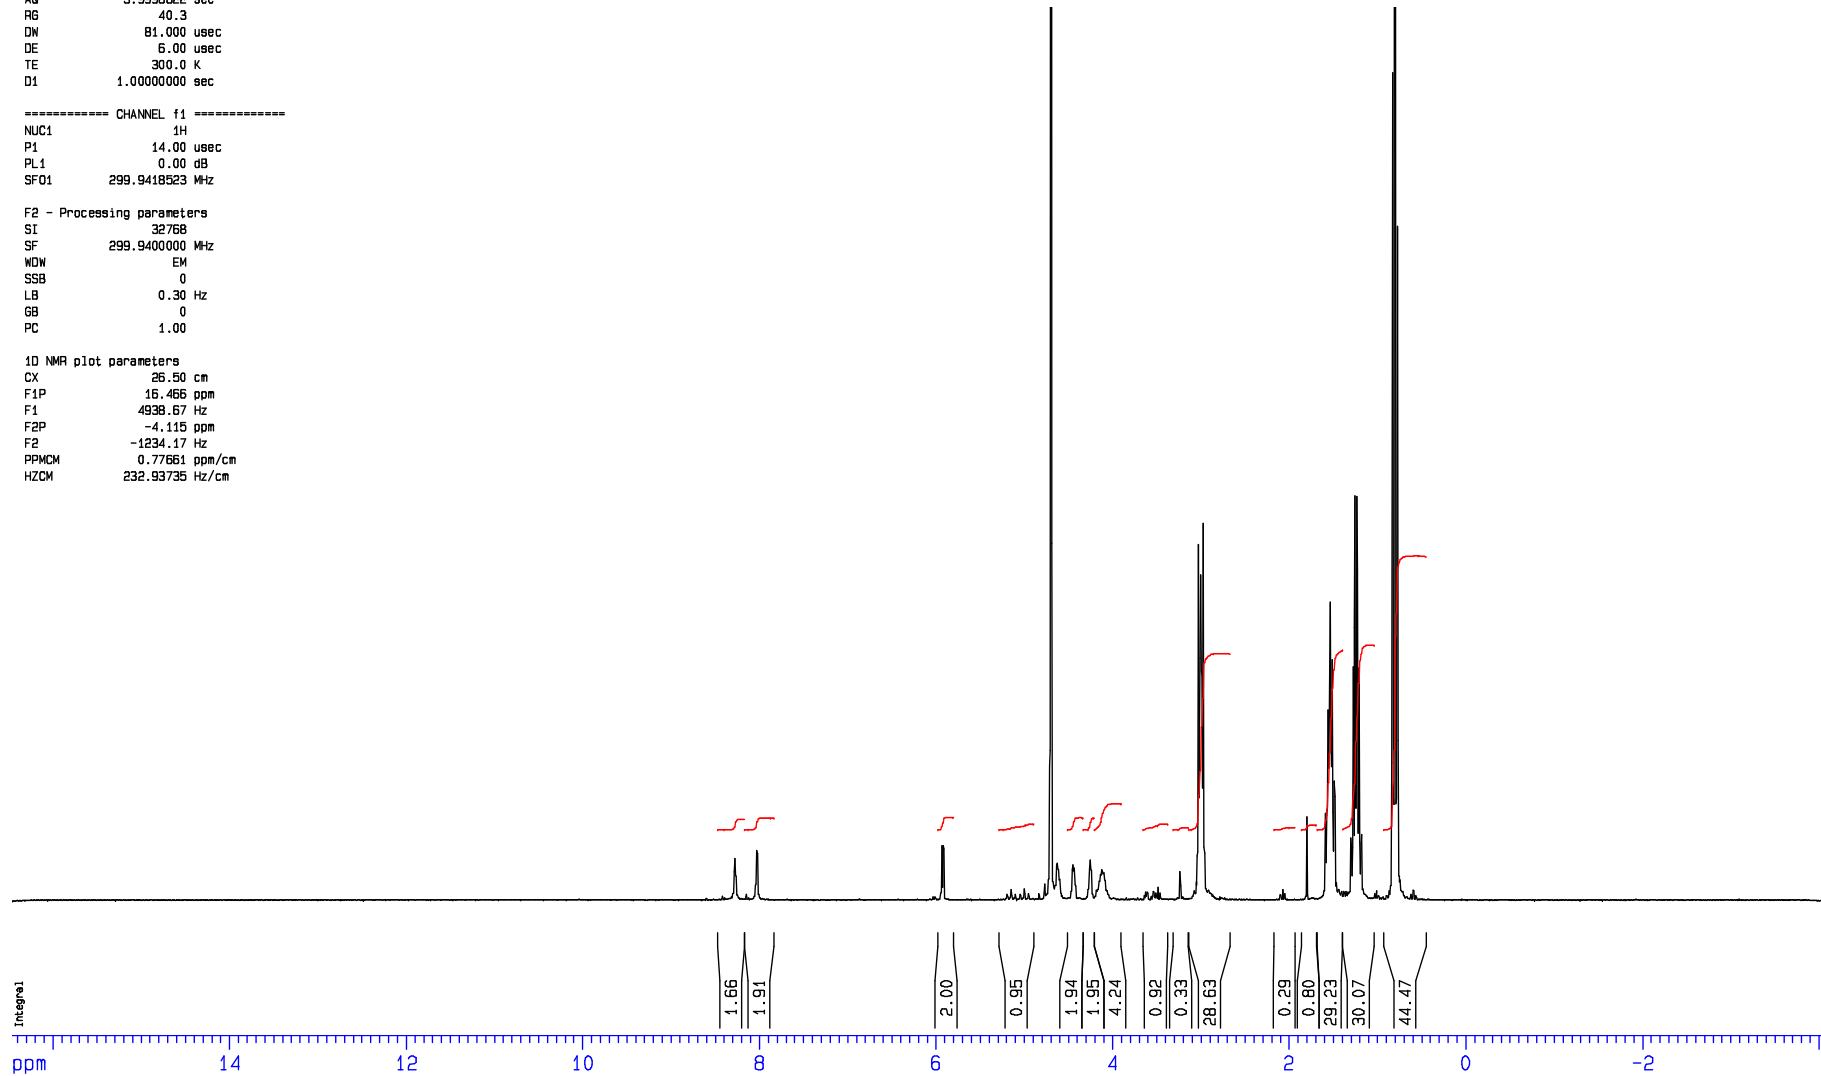

<sup>31</sup>P NMR (proton decoupled) of APPCHFPPA, **3e** as the tetrabutylammonium salt in D<sub>2</sub>O:

31P NMR (proton decoupled) of APPCHCFPPA Bu<sub>3</sub>N salt batch IY040910TBA1 in D<sub>2</sub>O

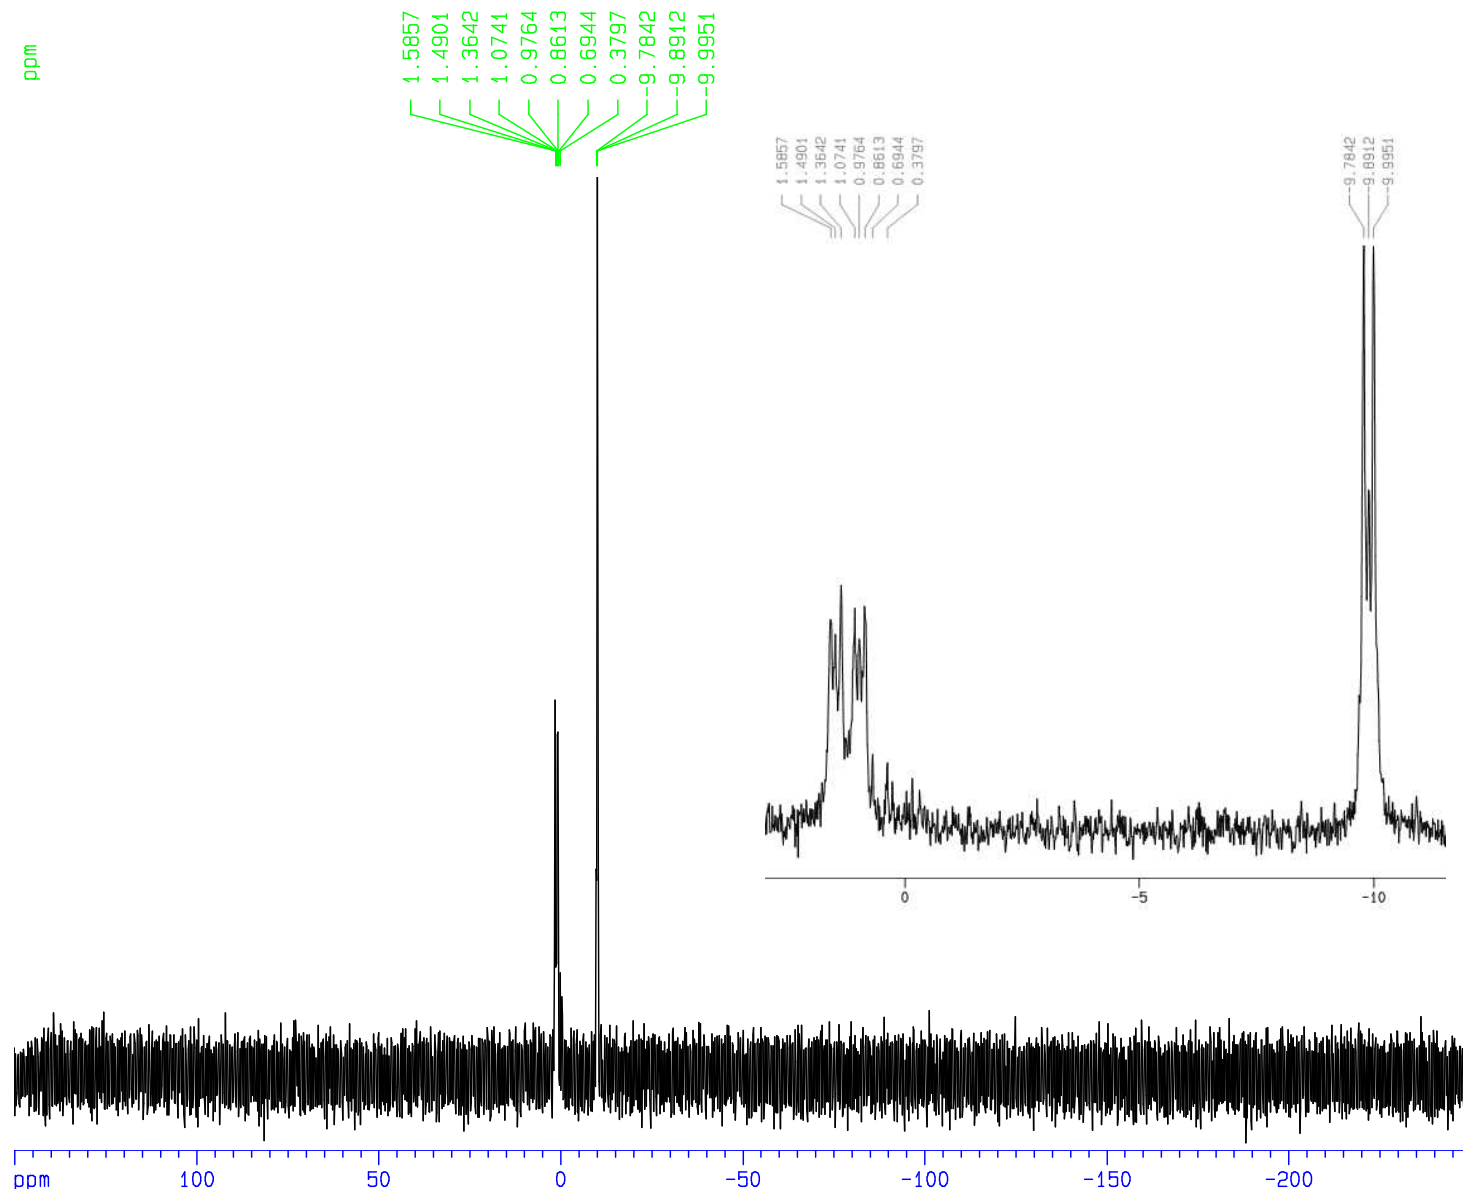

Current Data Parameters  
 NAME 040910TBA1\_APPCHCFPPA\_TBA  
 EXPNO 40  
 PROCNO 1

F2 - Acquisition Parameters  
 Date\_ 20041018  
 Time 14.58  
 INSTRUM spect  
 PROBHD 5 mm Multinuc  
 PULPROG zgpg30  
 TD 126514  
 SOLVENT d2o  
 NS 24  
 DS 4  
 SWH 48661.801 Hz  
 FIDRES 0.384636 Hz  
 AQ 1.2999814 sec  
 RG 16384  
 DW 10.275 usec  
 DE 6.00 usec  
 TE 300.0 K  
 D1 0.1000000 sec  
 d11 0.0300000 sec  
 d12 0.0002000 sec

===== CHANNEL f1 =====  
 NUC1 31P  
 P1 10.00 usec  
 PL1 3.00 dB  
 SFO1 121.4117167 MHz

===== CHANNEL f2 =====  
 CPDPRG2 waltz16  
 NUC2 1H  
 PCPD2 80.00 usec  
 PL2 0.00 dB  
 PL12 16.00 dB  
 PL13 17.00 dB  
 SFO2 299.9411998 MHz

F2 - Processing parameters  
 SI 32768  
 SF 121.4177880 MHz  
 HDW EM  
 SSB 0  
 LB 1.00 Hz  
 GB 0  
 PC 1.40

1D NMR plot parameters  
 CX 20.00 cm  
 F1P 150.387 ppm  
 F1 18259.60 Hz  
 F2P -250.393 ppm  
 F2 -30402.20 Hz  
 PPMCM 20.03899 ppm/cm  
 HZCM 2433.09009 Hz/cm

<sup>31</sup>P NMR (proton coupled) of APPCHFPPA, **3e** as the tetrabutylammonium salt in D<sub>2</sub>O:

31P NMR (proton coupled) of APPCHCFPPA Bu<sub>3</sub>N salt batch IY040910TBA1 in D2O

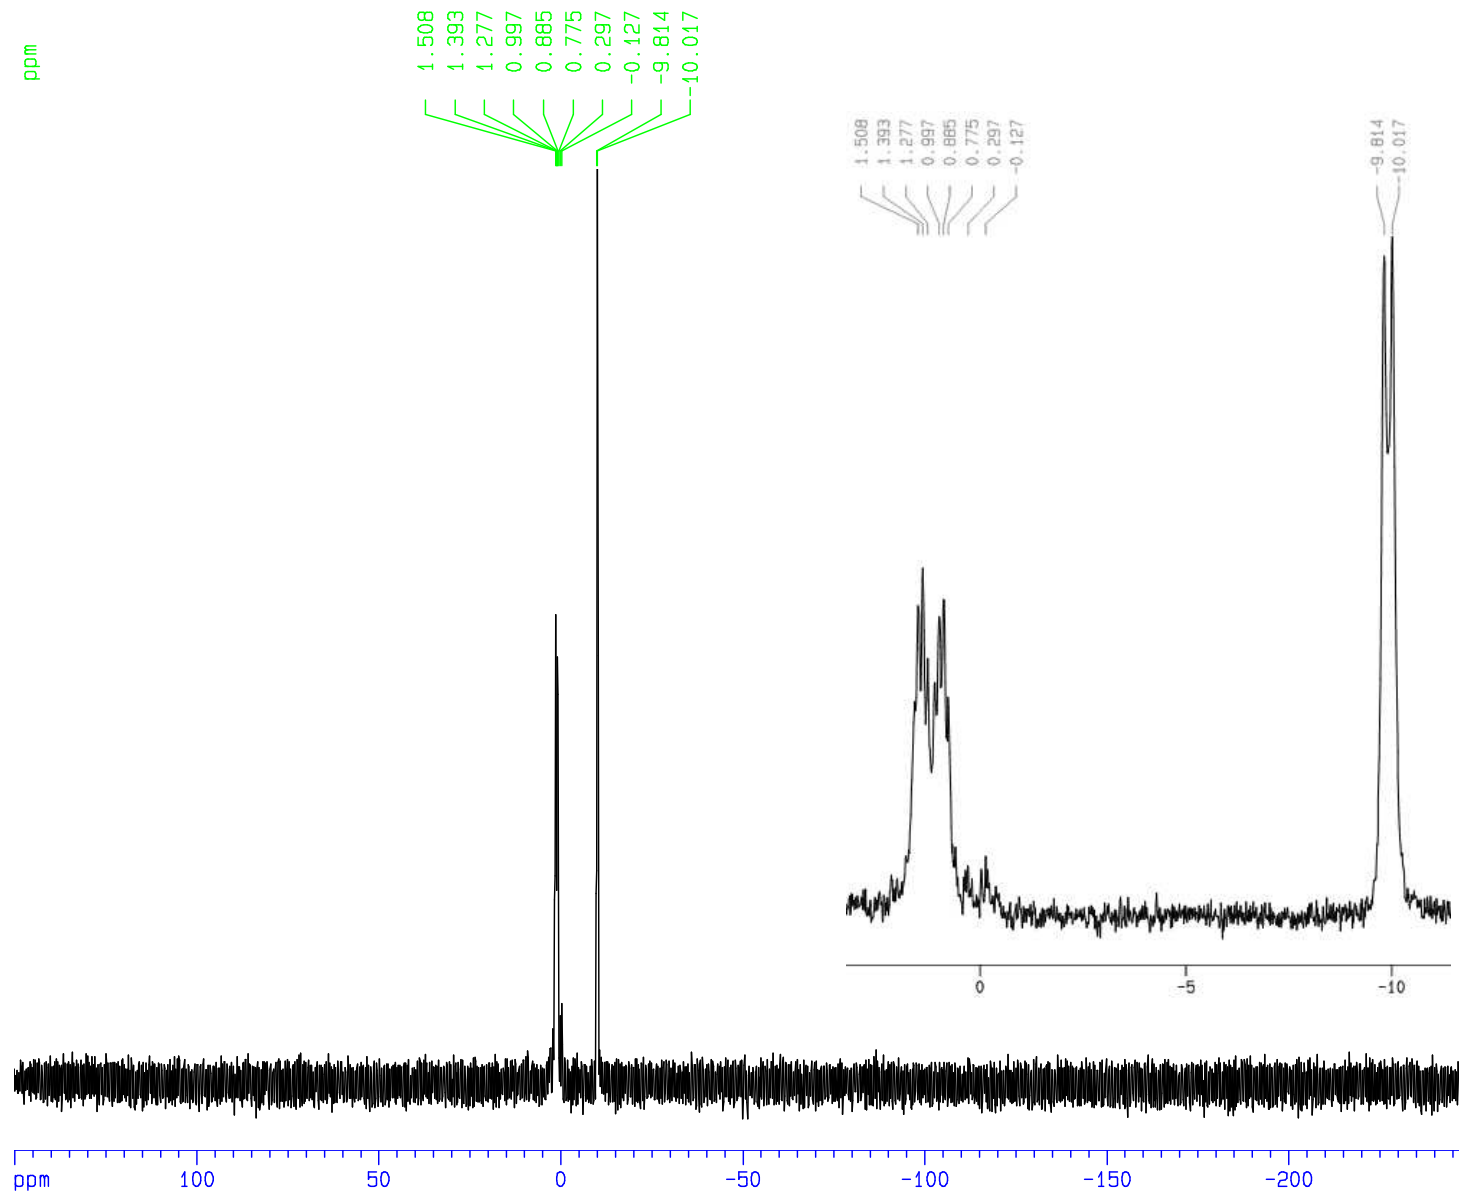

Current Data Parameters  
NAME 040910TBA1\_APPCHFPPA\_TBA  
EXPNO 30  
PROCNO 1

F2 - Acquisition Parameters  
Date\_ 20041018  
Time 14.44  
INSTRUM spect  
PROBHD 5 mm Multinuc  
PULPROG zg30  
TD 126514  
SOLVENT d2o  
NS 157  
DS 4  
SWH 48661.801 Hz  
FIDRES 0.384636 Hz  
AQ 1.2999814 sec  
RG 2580.3  
DW 10.275 usec  
DE 6.00 usec  
TE 300.0 K  
D1 0.1000000 sec

===== CHANNEL f1 =====  
NUC1 31P  
P1 10.00 usec  
PL1 3.00 dB  
SFO1 121.4117167 MHz

F2 - Processing parameters  
SI 32768  
SF 121.4177880 MHz  
WDW EM  
SSB 0  
LB 1.00 Hz  
GB 0  
PC 1.40

1D NMR plot parameters  
CX 20.00 cm  
F1P 150.387 ppm  
F1 18259.60 Hz  
F2P -250.393 ppm  
F2 -30402.20 Hz  
PPMCM 20.03899 ppm/cm  
HZCM 2433.09009 Hz/cm

# LCMS of APPCHFPPA sodium salt, **3e**:

040910Na\_APPCHCFPPA\_Na

9/29/2004 5:12:48 PM

RT: 0.00 - 15.02 SM: 3B

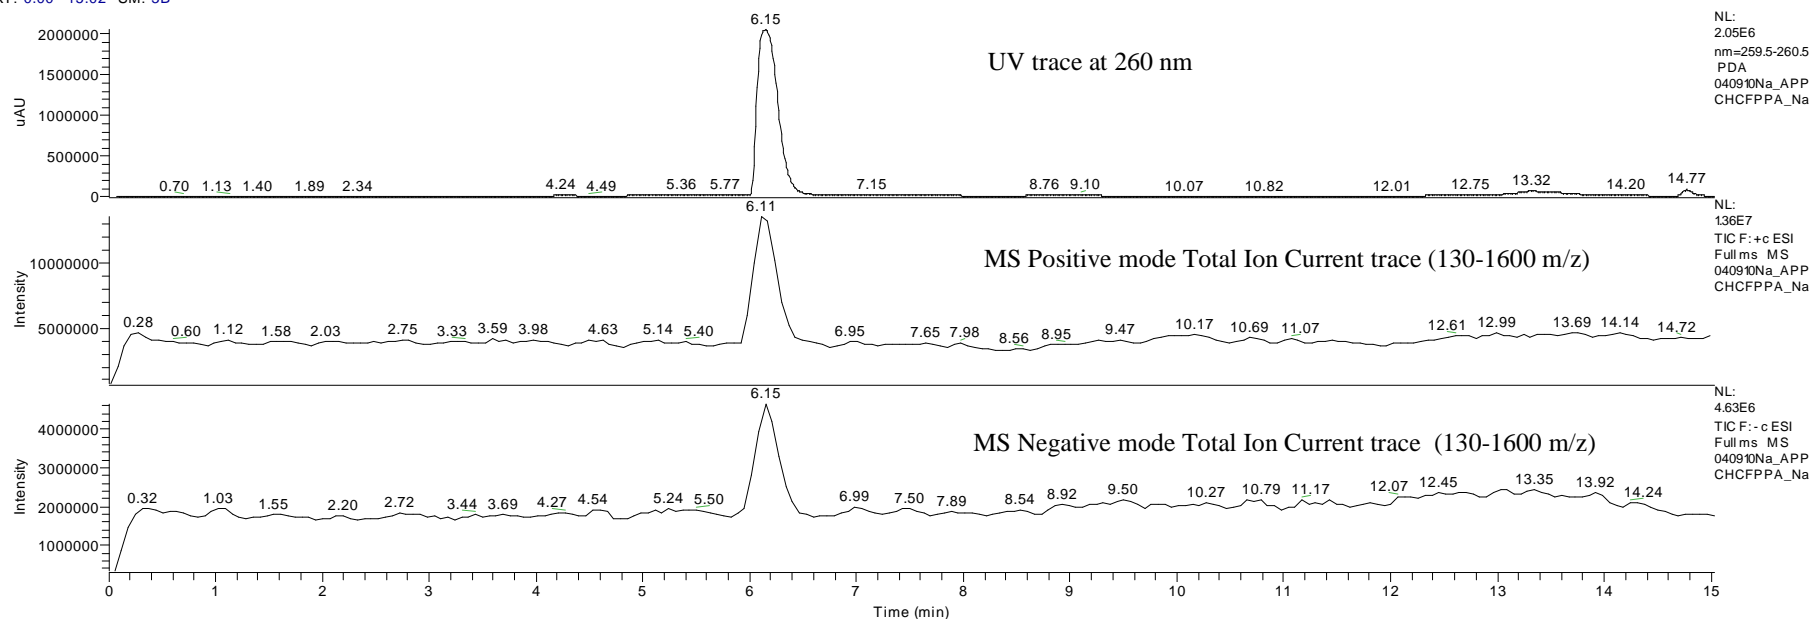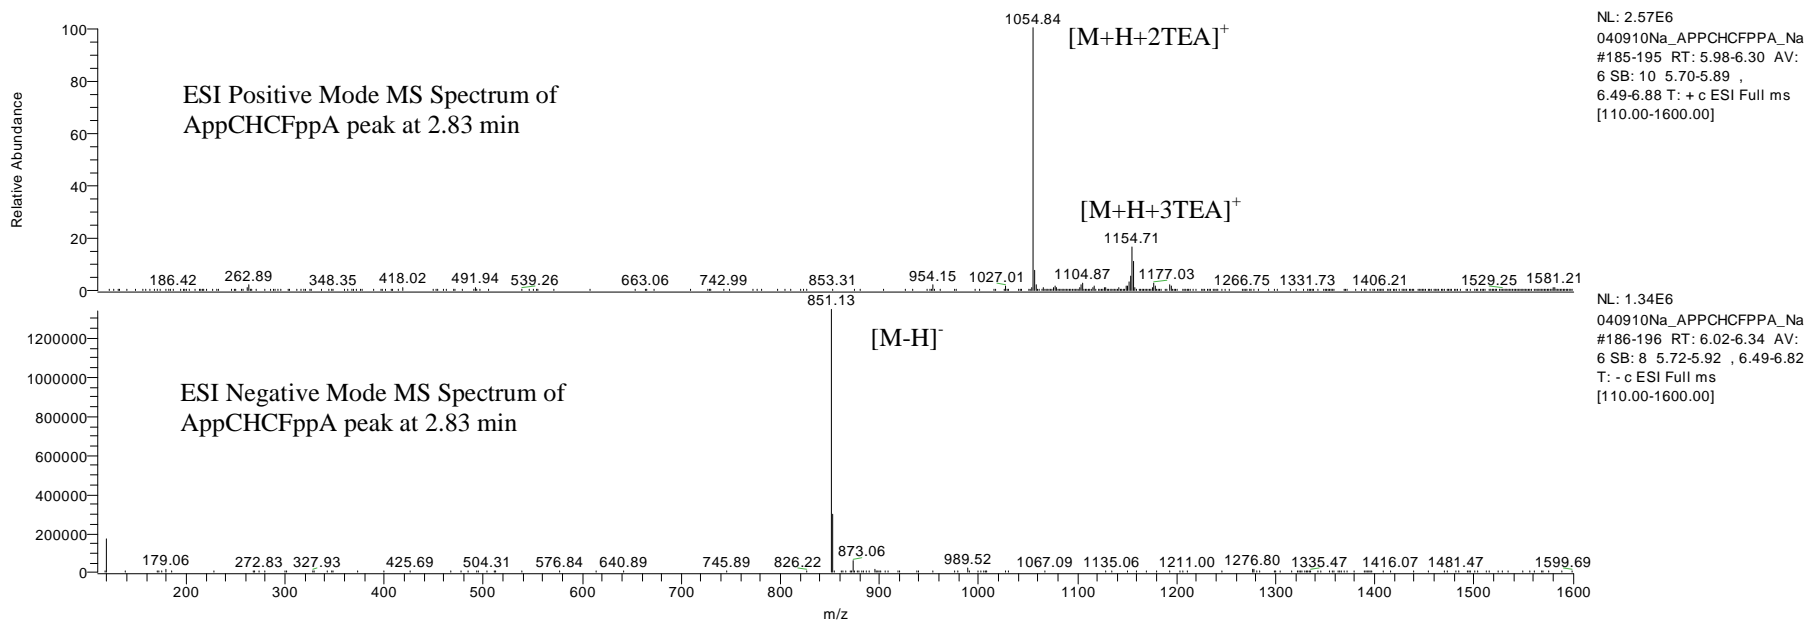



<sup>1</sup>H NMR of AP(S)PPP(S)A sodium salt, **3b** in D<sub>2</sub>O:

7.5 mg in 0.7 ml d2o

Current Data Parameters  
NAME ApSpppSA\_Na\_MYIV164  
EXPNO 10  
PROCNO 1

F2 - Acquisition Parameters  
Date\_ 20100421  
Time 17.43  
INSTRUM spect  
PROBHD 5 mm BBO BB-1H  
PULPROG zg30  
TD 51850  
SOLVENT D2O  
NS 45  
DS 2  
SWH 5081.301 Hz  
FIDRES 0.098000 Hz  
AQ 5.1020899 sec  
RG 1625.5  
DW 98.400 usec  
DE 6.50 usec  
TE 295.2 K  
D1 0.10000000 sec  
TD0 1

===== CHANNEL f1 =====  
NUC1 1H  
P1 10.00 usec  
PL1 9.20 dB  
SF01 299.5719490 MHz

F2 - Processing parameters  
SI 32768  
SF 299.5699822 MHz  
WDW EM  
SSB 0  
LB 0.30 Hz  
GB 0  
PC 1.00

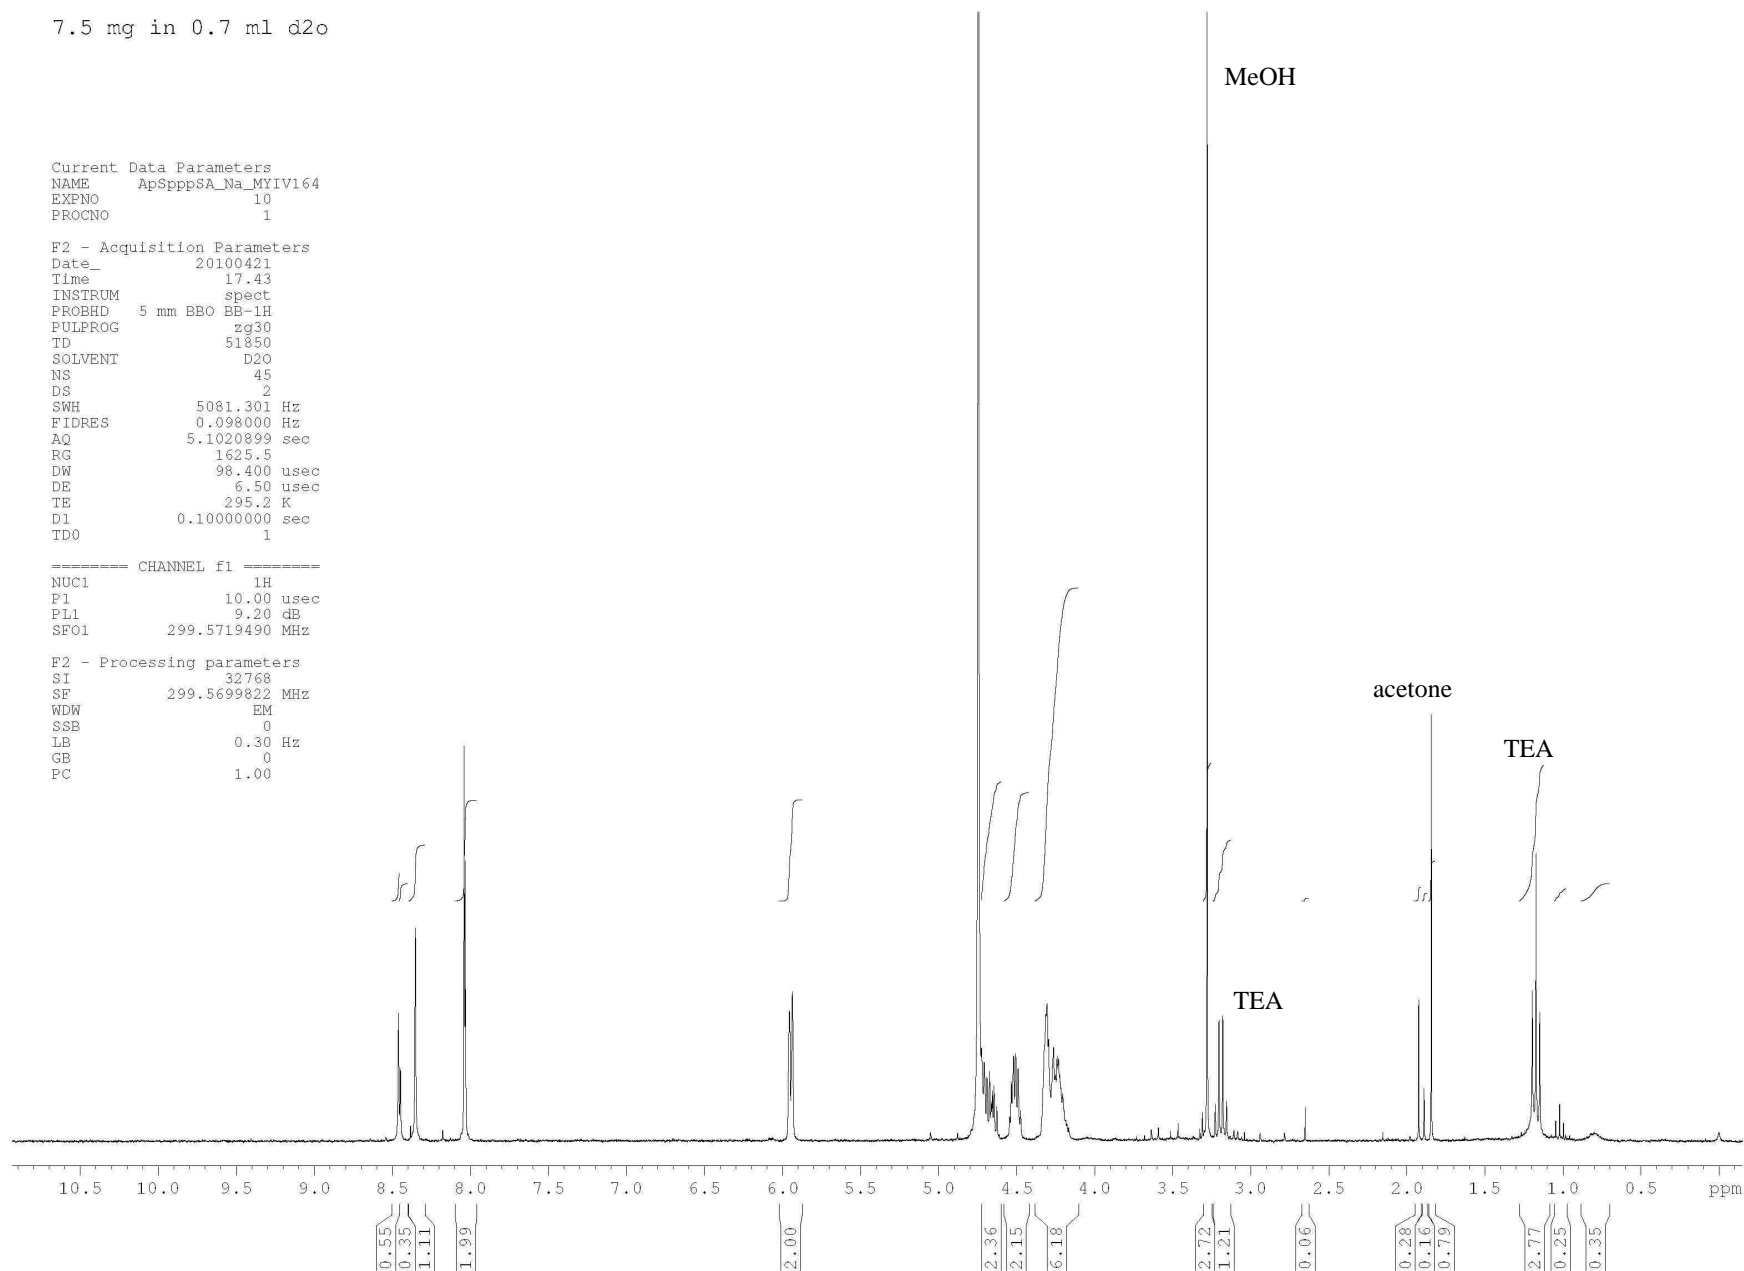

<sup>31</sup>P (proton decoupled) NMR of AP(S)PPP(S)A sodium salt, **3b** in D<sub>2</sub>O:

Current Data Parameters  
NAME ApSpppSA\_Na\_MXIV164  
EXPNO 20  
PROCNO 1

F2 - Acquisition Parameters  
Date\_ 20100421  
Time 17.47  
INSTRUM spect  
PROBHD 5 mm BBO BB-1H  
PULPROG zgpg30  
TD 136248  
SOLVENT D2O  
NS 185  
DS 4  
SWH 48661.801 Hz  
FIDRES 0.357156 Hz  
AQ 1.3999982 sec  
RG 23170.5  
DW 10.275 usec  
DE 6.50 usec  
TE 295.3 K  
D1 0.10000000 sec  
d11 0.03000000 sec  
DELTA 0.00000000 sec  
TD0 1

==== CHANNEL f1 =====  
NUC1 31P  
P1 7.00 usec  
PL1 12.70 dB  
SFO1 121.2684058 MHz

==== CHANNEL f2 =====  
CPDPRG2 waltz16  
NUC2 1H  
PCPD2 100.00 usec  
PL12 29.00 dB  
PL13 120.00 dB  
PL2 9.00 dB  
SFO2 299.5711070 MHz

F2 - Processing parameters  
SI 32768  
SF 121.2684187 MHz  
WDW EM  
SSB 0  
LB 2.00 Hz  
GB 0  
PC 1.40

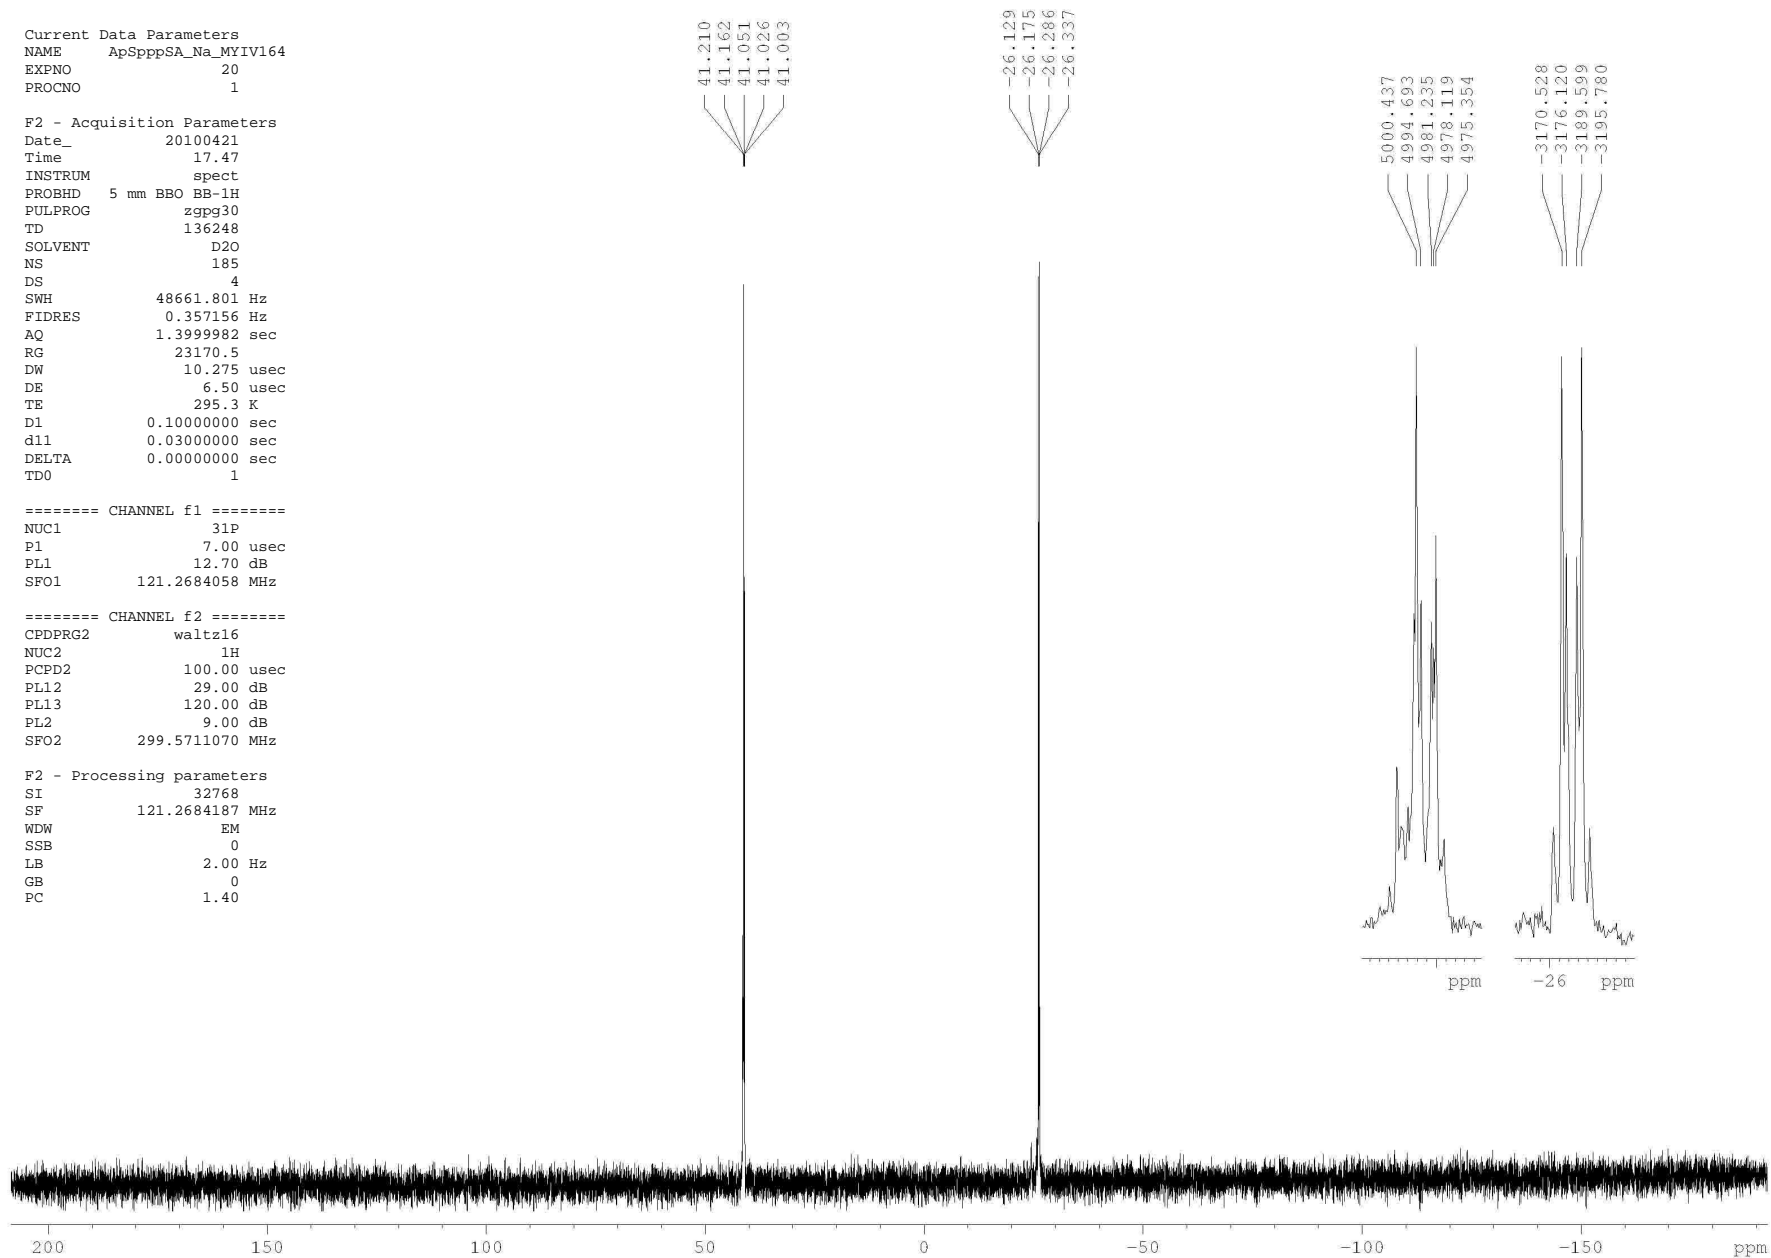

Separation of the three diastereomers of AP(S)PPP(S)A, **3b** by reverse phase ion-pairing chromatography:

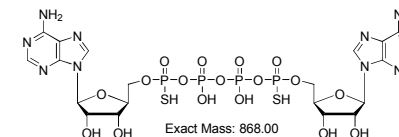

\\90.0.0.63(c\$)...ApSpppSA\_MYIV164\_Na

4/22/2010 6:37:19 PM

RT: 0.00 - 54.98 SM: 3B

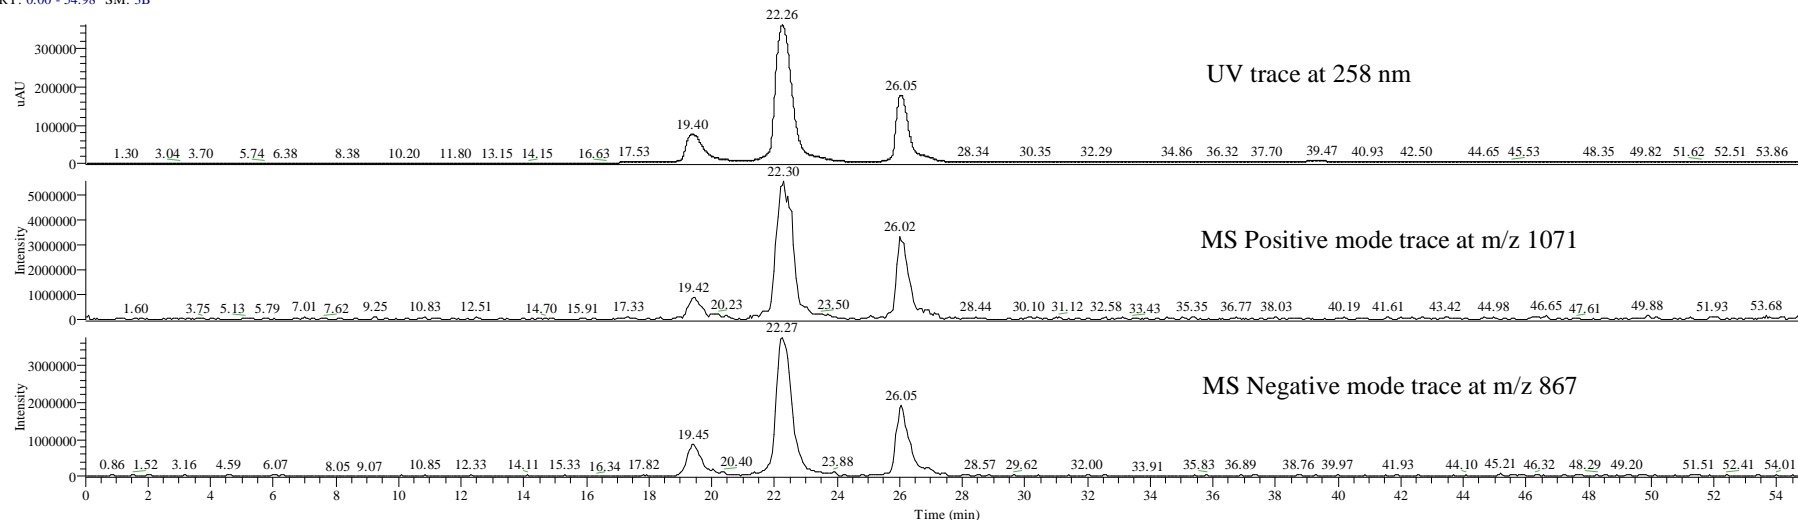

NL: 3.6E5  
nm=255.9-2611  
PDA  
ApSpppSA\_MYIV  
164\_Na

NL: 5.53E6  
m/z=  
1068.74-1074.09 F:  
+c ESI Full ms  
MS  
ApSpppSA\_MYIV  
164\_Na

NL: 3.73E6  
m/z=  
864.88-869.59 F:  
-c ESI Full ms  
MS  
ApSpppSA\_MYIV  
164\_Na

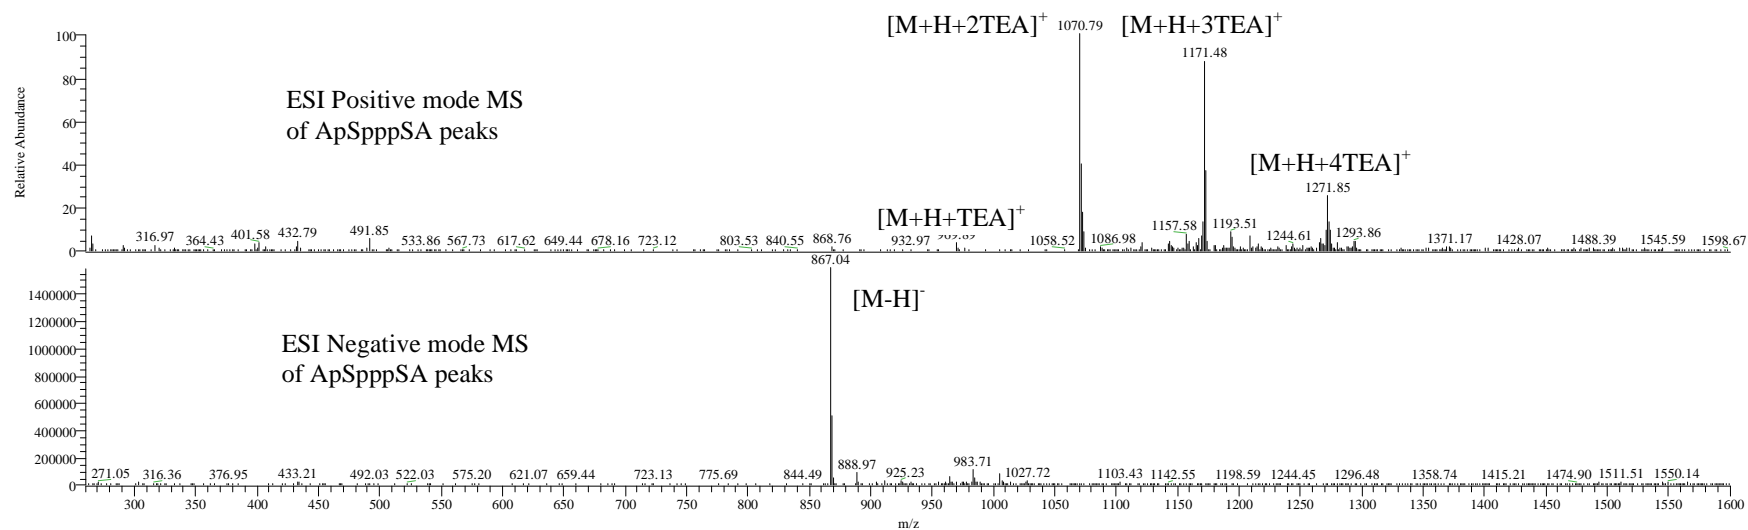

NL: 2.26E6  
ApSpppSA\_MYIV164\_Na#  
862-893 RT: 21.95-22.70  
AV: 16 SB: 22  
21.24-21.67, 23.96-24.56  
F: +c ESI Full ms

NL: 1.58E6  
ApSpppSA\_MYIV164\_Na#  
862-895 RT: 21.93-22.72  
AV: 17 SB: 17  
21.12-21.45, 23.40-23.91  
F: -c ESI Full ms

<sup>1</sup>H NMR spectrum of AP(S)PCHCIPP(S)A sodium salt, **3d** in D<sub>2</sub>O:

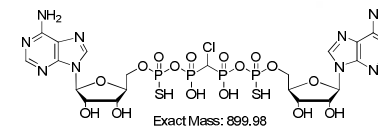

<sup>1</sup>H NMR of APsPCHCIPPsA sodium salt in D<sub>2</sub>O, batches iy3-3 and iy3-7

Current Data Parameters  
NAME iy3-3-iy3-7-b1  
EXPNO 10  
PROCNO 1

F2 - Acquisition Parameters  
Date\_ 20030214  
Time 11.44  
INSTRUM spect  
PROBHD 5 mm Multinuc  
PULPROG zg30  
TD 31474  
SOLVENT D2O  
NS 16  
DS 2  
SWH 4496.401 Hz  
FIDRES 0.142861 Hz  
AQ 3.4999599 sec  
RG 362  
DW 111.200 usec  
DE 6.00 usec  
TE 300.0 K  
D1 0.10000000 sec

----- CHANNEL f1 -----  
NUC1 <sup>1</sup>H  
P1 14.00 usec  
PL1 0.00 dB  
SF01 300.0518529 MHz

F2 - Processing parameters  
S1 32768  
SF 300.0500025 MHz  
WDW EM  
SSB 0  
LB 0.30 Hz  
GB 0  
PC 1.00

3D NMR plot parameters  
CX 26.50 cm  
F1P 10.086 ppm  
F1 3026.36 Hz  
F2P -0.184 ppm  
F2 -55.35 Hz  
PPMCM 0.38757 ppm/cm  
HZCM 116.29063 Hz/cm

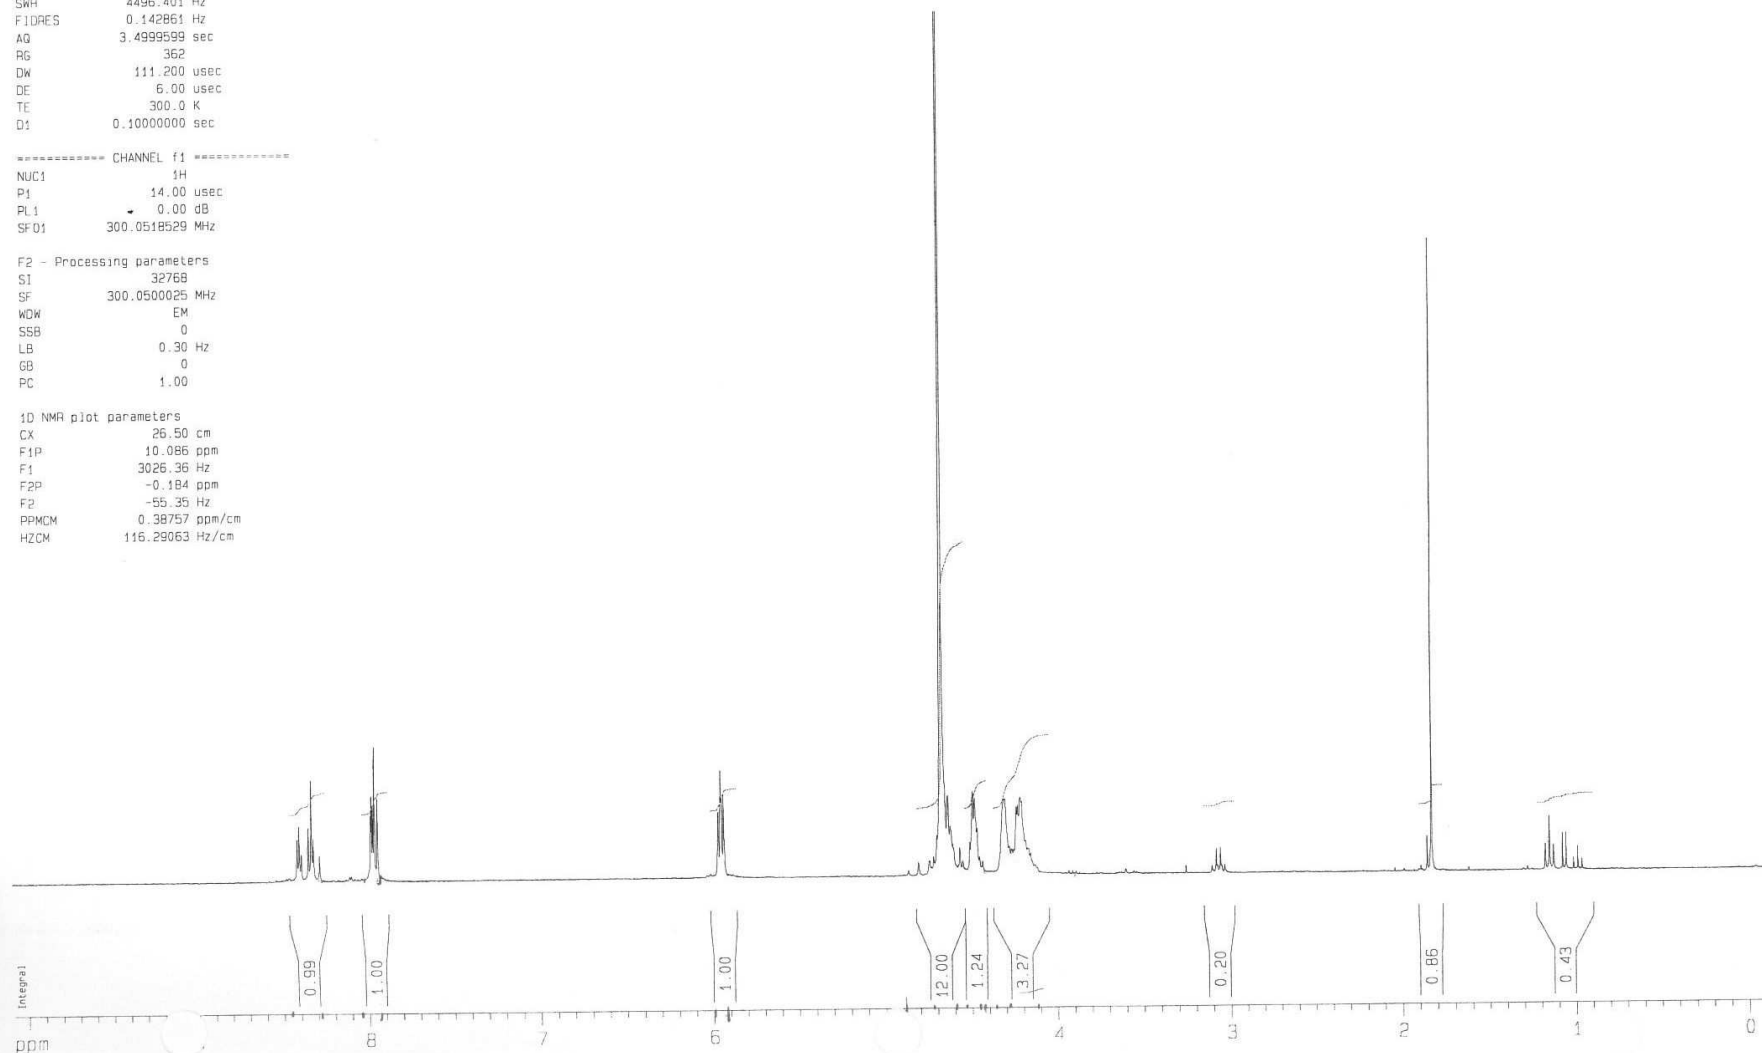

<sup>31</sup>P (proton decoupled) NMR spectrum of AP(S)PCHCIPP(S)A sodium salt, **3d** in D<sub>2</sub>O:

Current Data Parameters  
NAME iy3-3-iy3-7-b1  
EXPNO 30  
PROCNO 1

F2 - Acquisition Parameters  
Date\_ 20030214  
Time 12.10  
INSTRUM spect  
PROBHD 5 mm Multinuc  
PULPROG zgpg30  
TD 65536  
SOLVENT d2o  
NS 490  
DS 4  
SWH 24330.900 Hz  
FIDRES 0.371260 Hz  
AQ 1.3468148 sec  
RG 20642.5  
DW 20.550 usec  
DE 5.00 usec  
TE 300.0 K  
D1 0.20000000 sec  
d11 0.03000000 sec  
d12 0.00002000 sec

Phosphorous NMR (proton dec.) of APsPCHCIPPsa sodium salt in D2O, batches iy3-3 and iy3-7

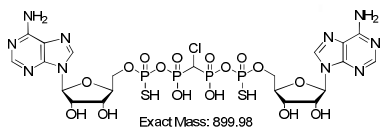

===== CHANNEL f1 =====  
NUC1 31P  
P1 3.50 usec  
PL1 3.00 dB  
SFO1 121.4623199 MHz

===== CHANNEL f2 =====  
CPDPRG2 waltz16  
NUC2 1H  
PCPD2 80.00 usec  
PL2 0.00 dB  
PL12 15.14 dB  
PL13 17.00 dB  
SFO2 300.0512002 MHz

F2 - Processing parameters  
SI 32768  
SF 121.4623160 MHz  
WDW EM  
SSB 0  
LB 1.00 Hz  
GB 0  
PC 1.40

1D NMR plot parameters  
CX 26.50 cm  
F1P 100.190 ppm  
F1 12169.36 Hz  
F2P -100.126 ppm  
F2 -12161.54 Hz  
PPMCM 7.55911 ppm/cm  
HZCM 918.14722 Hz/cm

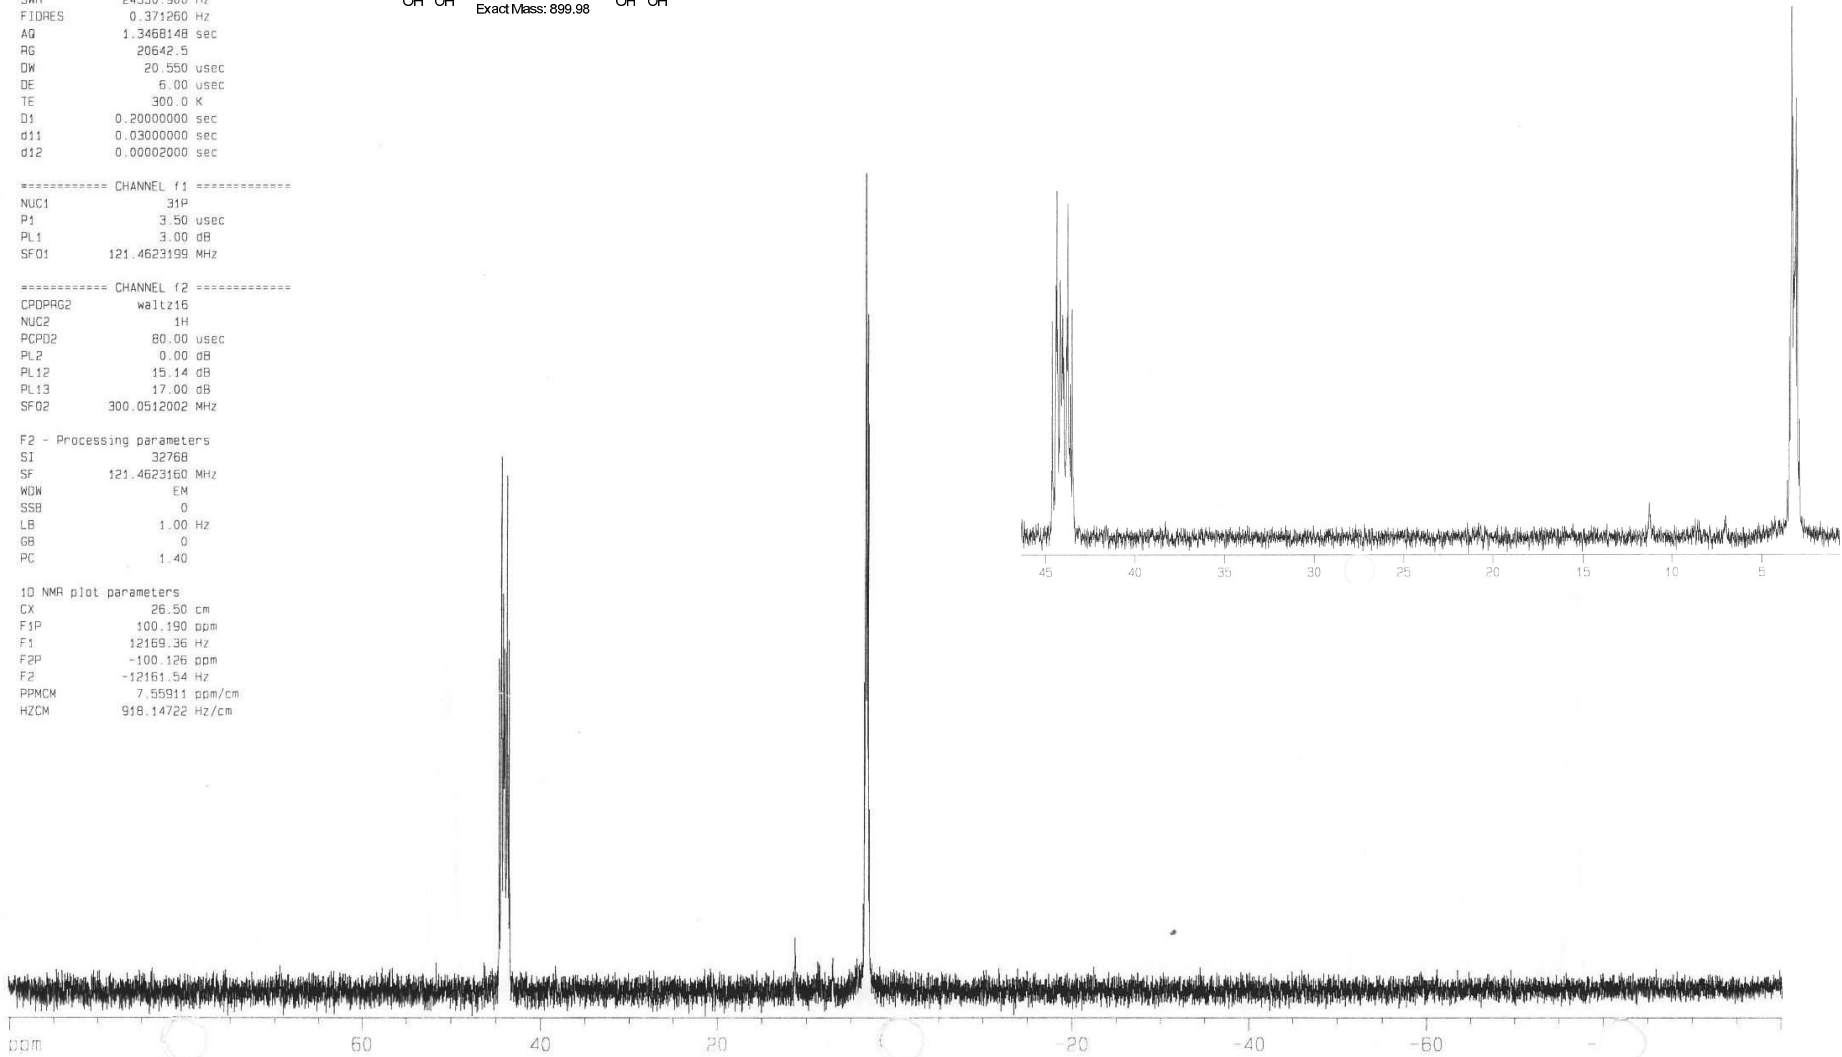

<sup>31</sup>P (proton coupled) NMR spectrum of AP(S)PCHCIPP(S)A sodium salt, **3d** in D<sub>2</sub>O:

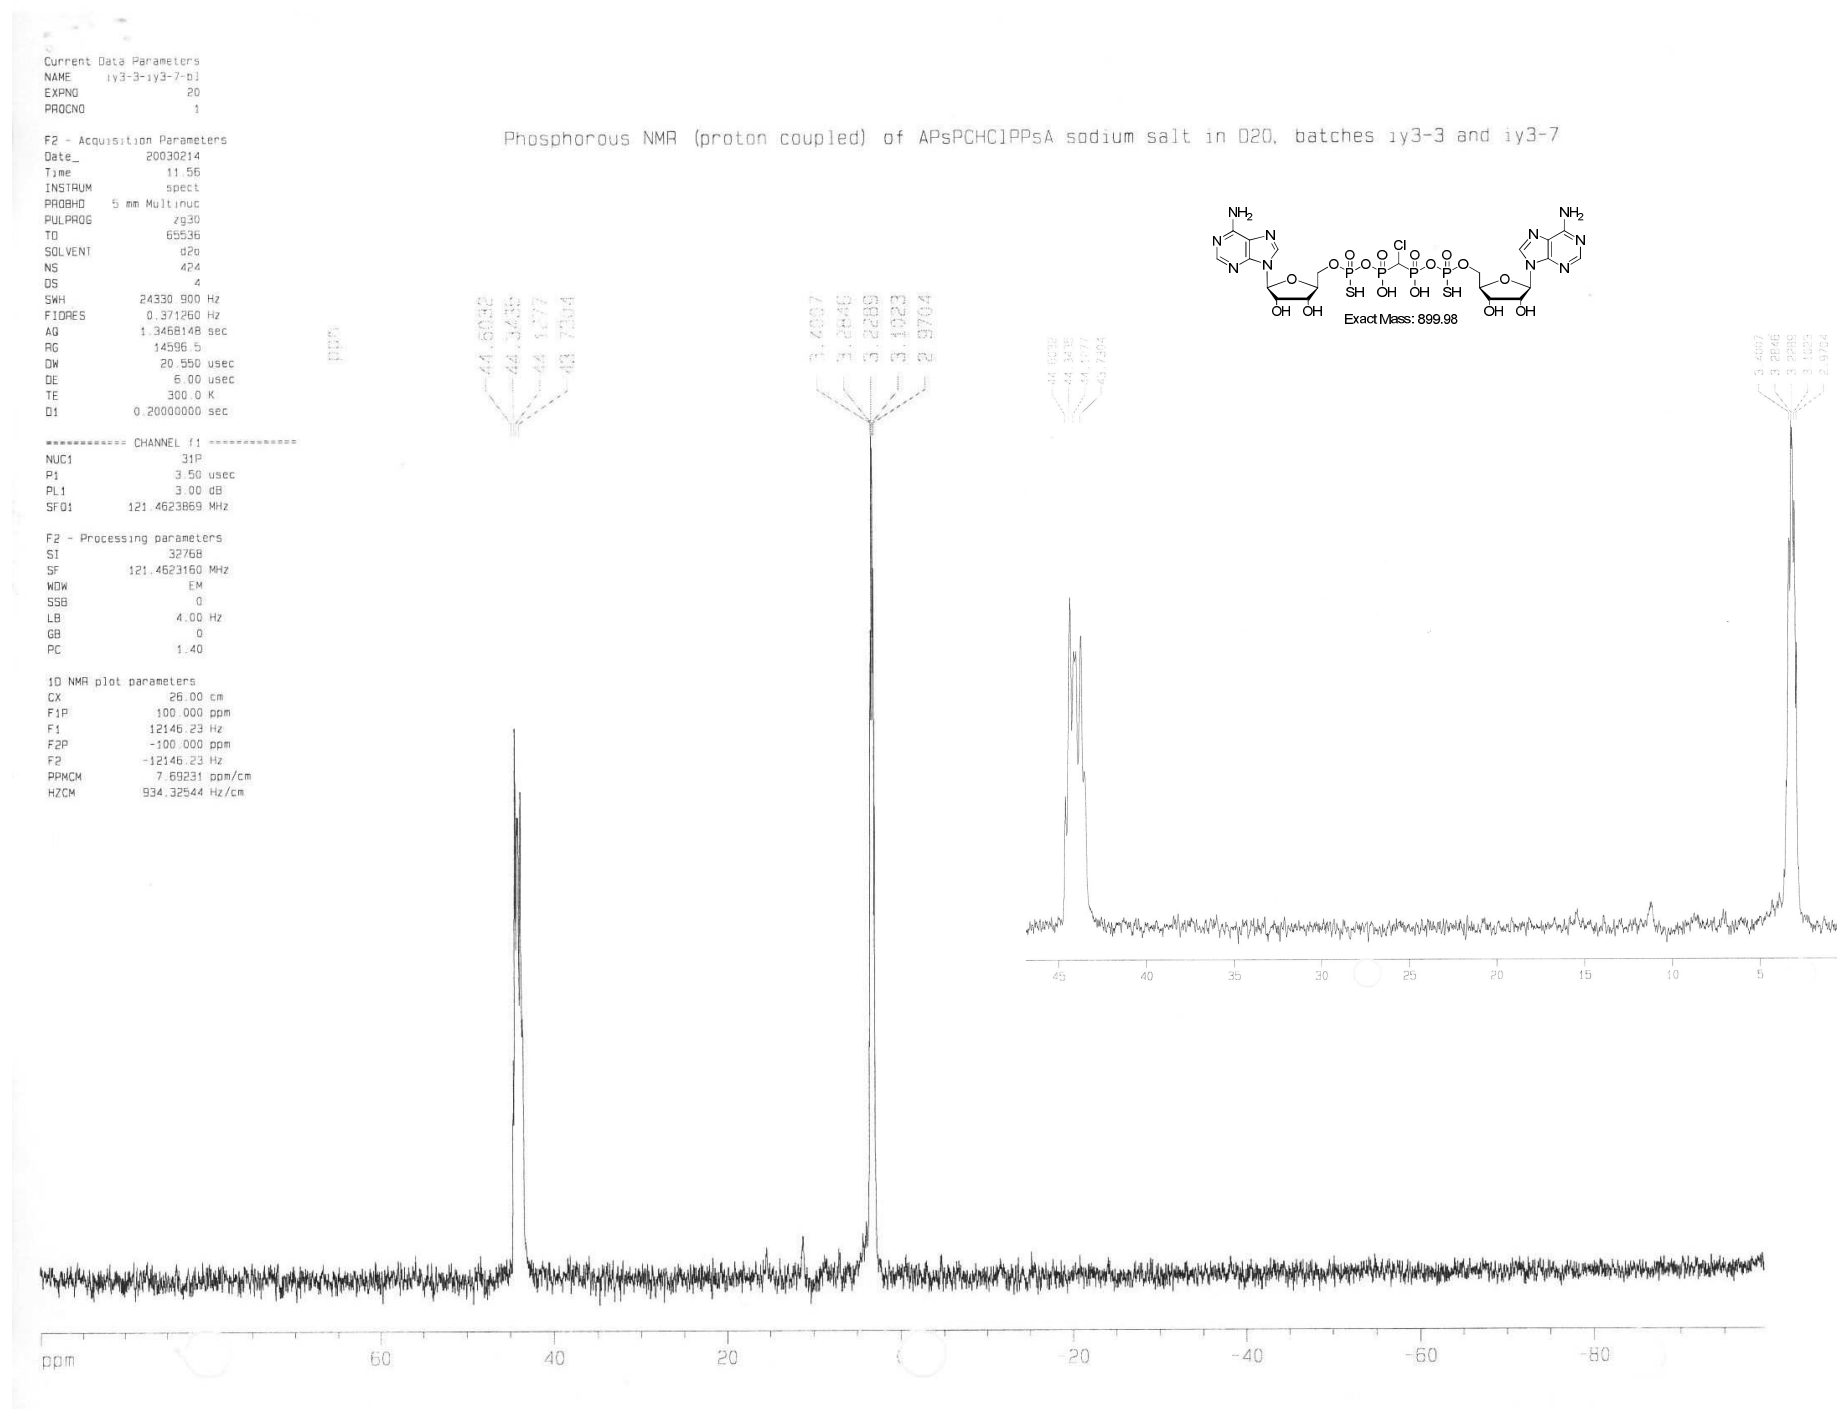

Separation of the four diastereomers of AP(S)PPCHCIP(S)A, **3d** by reverse phase ion-pairing chromatography:

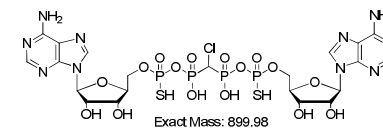

iy3\_7-fl5-25-p4-APsPCHCIPsA\_resin\_co...  
1 ul of 1mM sol in 20mM TEAA

3/6/2007 11:50:49 AM

RT: 0.00 - 16.00 SM: 3B

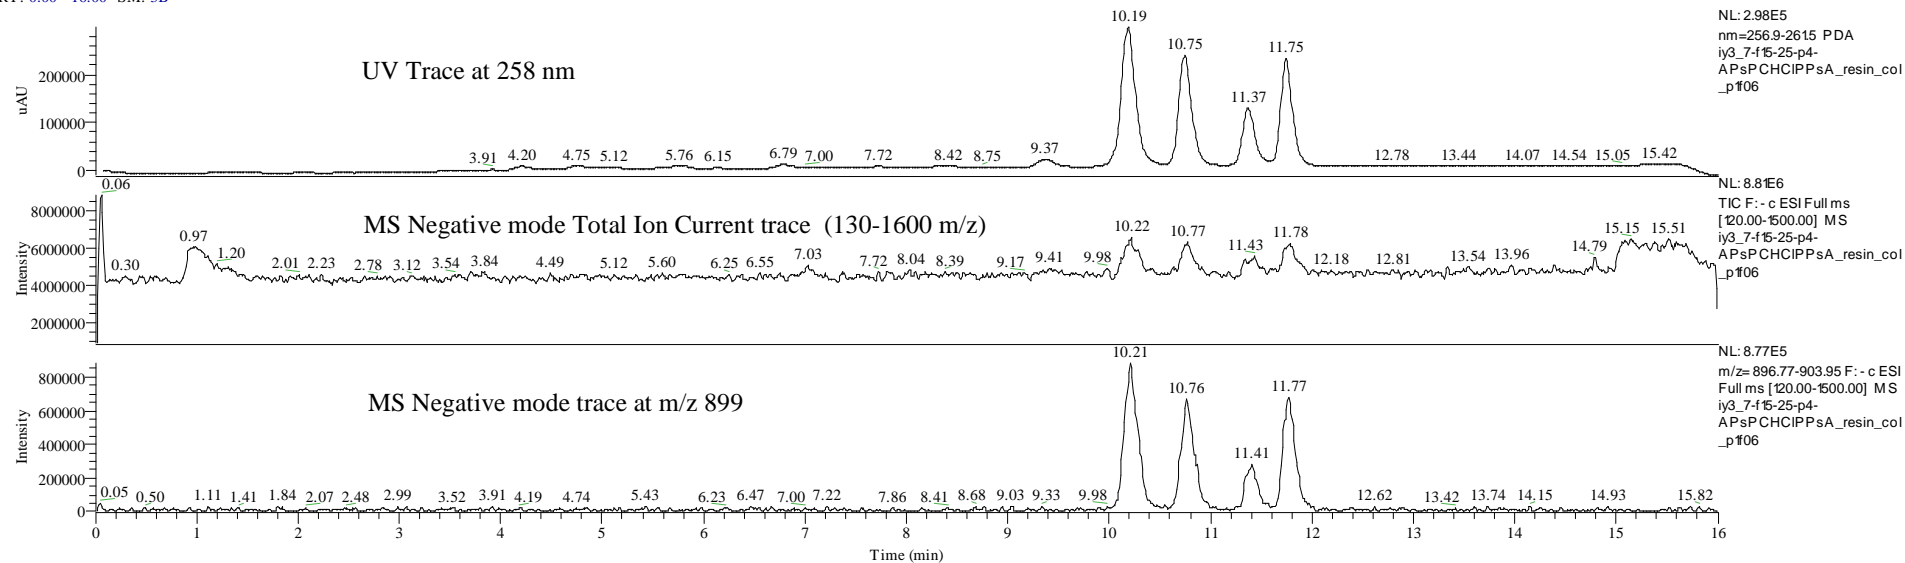

iy3\_7-fl5-25-p4-APsPCHCIPsA\_resin\_col\_p1f06 #959-979 RT: 10.11-10.33 AV: 21 SB: 23 9.88-9.97, 10.42-10.55 NL: 2.79E5  
F: - c ESI Full ms [120.00-1500.00]

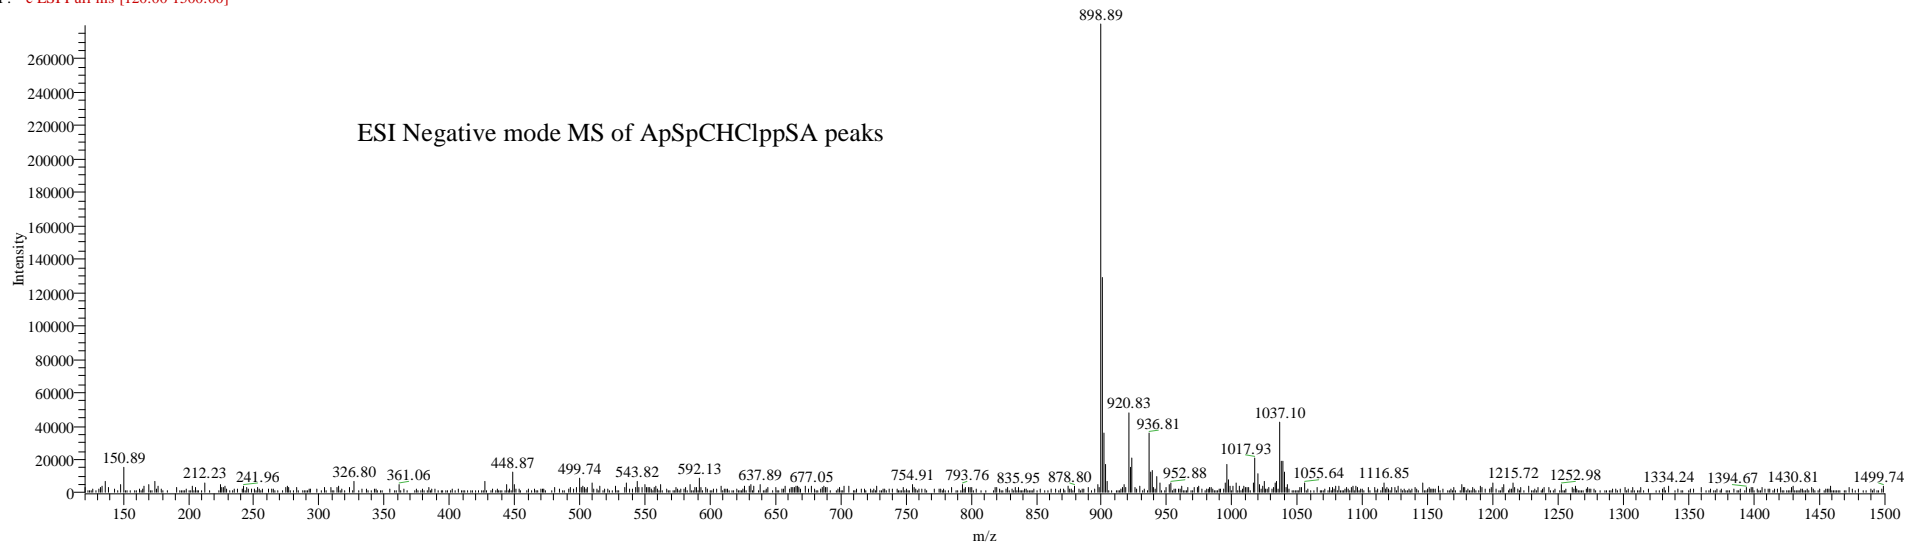

Supplement: NIHMS921560-supplement-Suplementary_Materials.pdf [file NIHMS921560-supplement-Suplementary_Materials.pdf]
